# Supplementary material
Source: publisher figshare collection journal article supplement (https://acs.figshare.com/ndownloader/files/3738871)
Supplement: Supplementary file 1 [file 3738871]

## ***Supplementary Data***

### **Meroterpenoids from a Tropical *Dysidea* sp. Sponge**

Chang-Kwon Kim,<sup>†</sup> Jung-Kyun Woo,<sup>†</sup> Seong-Hwan Kim,<sup>†</sup> Eunji Cho,<sup>‡</sup> Yeon-Ju Lee,<sup>§</sup>  
Hyi-Seung Lee,<sup>§</sup> Chung J. Sim,<sup>⊥</sup> Dong-Chan Oh,<sup>†</sup> Ki-Bong Oh,<sup>‡, \*</sup> and Jongheon Shin<sup>†, \*</sup>

<sup>†</sup>*Natural Products Research Institute, College of Pharmacy, Seoul National University,  
San 56-1, Sillim, Gwanak, Seoul 151-742, Korea*

<sup>‡</sup>*Department of Agricultural Biotechnology, College of Agriculture & Life Science,  
Seoul National University, San 56-1, Sillim, Gwanak, Seoul 151-921, Korea*

<sup>§</sup>*Marine Natural Products Laboratory, Korea Institute of Ocean Science & Technology,  
P.O. Box 29, Seoul 425-600, Korea*

<sup>⊥</sup>*Department of Biological Science, College of Life Science and Nano Technology,  
Hannam University, 461-6 Jeonmin, Yuseong, Daejeon 305-811, Korea*

## Contents

|                                                                                                                |     |
|----------------------------------------------------------------------------------------------------------------|-----|
| <b>Figure S1.</b> The $^1\text{H}$ NMR (500 MHz, $\text{CD}_3\text{OD}$ ) spectrum of compound <b>1</b>        | S4  |
| <b>Figure S2.</b> The $^{13}\text{C}$ NMR (125 MHz, $\text{CD}_3\text{OD}$ ) spectrum of compound <b>1</b>     | S5  |
| <b>Figure S3.</b> The COSY NMR (500 MHz, $\text{CD}_3\text{OD}$ ) spectrum of compound <b>1</b>                | S6  |
| <b>Figure S4.</b> The HSQC NMR (500 MHz, $\text{CD}_3\text{OD}$ ) spectrum of compound <b>1</b>                | S7  |
| <b>Figure S5.</b> The HMBC NMR (500 MHz, $\text{CD}_3\text{OD}$ ) spectrum of compound <b>1</b>                | S8  |
| <b>Figure S6.</b> The NOESY NMR (500 MHz, $\text{CD}_3\text{OD}$ ) spectrum of compound <b>1</b>               | S9  |
| <b>Figure S7.</b> The $^1\text{H}$ NMR (500 MHz, $\text{CD}_3\text{OD}$ ) spectrum of compound <b>2</b>        | S10 |
| <b>Figure S8.</b> The $^{13}\text{C}$ NMR (125 MHz, $\text{CD}_3\text{OD}$ ) spectrum of compound <b>2</b>     | S11 |
| <b>Figure S9.</b> The COSY NMR (500 MHz, $\text{CD}_3\text{OD}$ ) spectrum of compound <b>2</b>                | S12 |
| <b>Figure S10.</b> The HSQC NMR (500 MHz, $\text{CD}_3\text{OD}$ ) spectrum of compound <b>2</b>               | S13 |
| <b>Figure S11.</b> The HMBC NMR (500 MHz, $\text{CD}_3\text{OD}$ ) spectrum of compound <b>2</b>               | S14 |
| <b>Figure S12.</b> The NOESY NMR (500 MHz, $\text{CD}_3\text{OD}$ ) spectrum of compound <b>2</b>              | S15 |
| <b>Figure S13.</b> The $^1\text{H}$ NMR (400 MHz, $\text{DMSO}-d_6$ ) spectrum of compound <b>3</b>            | S16 |
| <b>Figure S14.</b> The $^{13}\text{C}$ NMR (100 MHz, $\text{DMSO}-d_6$ ) spectrum of compound <b>3</b>         | S17 |
| <b>Figure S15.</b> The COSY NMR (400 MHz, $\text{DMSO}-d_6$ ) spectrum of compound <b>3</b>                    | S18 |
| <b>Figure S16.</b> The HSQC NMR (400 MHz, $\text{DMSO}-d_6$ ) spectrum of compound <b>3</b>                    | S19 |
| <b>Figure S17.</b> The HMBC NMR (400 MHz, $\text{DMSO}-d_6$ ) spectrum of compound <b>3</b>                    | S20 |
| <b>Figure S18.</b> The NOESY NMR (400 MHz, $\text{DMSO}-d_6$ ) spectrum of compound <b>3</b>                   | S21 |
| <b>Figure S19.</b> The $^1\text{H}$ NMR (500 MHz, $\text{CD}_3\text{OD}$ ) spectrum of compound <b>4</b>       | S22 |
| <b>Figure S20.</b> The $^{13}\text{C}$ NMR (125 MHz, $\text{CD}_3\text{OD}$ ) spectrum of compound <b>4</b>    | S23 |
| <b>Figure S21.</b> The COSY NMR (500 MHz, $\text{CD}_3\text{OD}$ ) spectrum of compound <b>4</b>               | S24 |
| <b>Figure S22.</b> The HSQC NMR (500 MHz, $\text{CD}_3\text{OD}$ ) spectrum of compound <b>4</b>               | S25 |
| <b>Figure S23.</b> The HMBC NMR (500 MHz, $\text{CD}_3\text{OD}$ ) spectrum of compound <b>4</b>               | S26 |
| <b>Figure S24.</b> The D-HMBC NMR (500 MHz, $\text{CD}_3\text{OD}$ , $J = 4$ Hz) spectrum of compound <b>4</b> | S27 |
| <b>Figure S25.</b> The NOESY NMR (500 MHz, $\text{CD}_3\text{OD}$ ) spectrum of compound <b>4</b>              | S28 |
| <b>Figure S26.</b> The $^1\text{H}$ NMR (600 MHz, $\text{CD}_3\text{OD}$ ) spectrum of compound <b>5</b>       | S29 |
| <b>Figure S27.</b> The $^{13}\text{C}$ NMR (150 MHz, $\text{CD}_3\text{OD}$ ) spectrum of compound <b>5</b>    | S30 |
| <b>Figure S28.</b> The COSY NMR (600 MHz, $\text{CD}_3\text{OD}$ ) spectrum of compound <b>5</b>               | S31 |
| <b>Figure S29.</b> The HSQC NMR (600 MHz, $\text{CD}_3\text{OD}$ ) spectrum of compound <b>5</b>               | S32 |

|                                                                                                                                                       |     |
|-------------------------------------------------------------------------------------------------------------------------------------------------------|-----|
| <b>Figure S30.</b> The HMBC NMR (600 MHz, CD <sub>3</sub> OD) spectrum of compound <b>5</b>                                                           | S33 |
| <b>Figure S31.</b> The NOESY NMR (600 MHz, CD <sub>3</sub> OD) spectrum of compound <b>5</b>                                                          | S34 |
| <b>Figure S32.</b> The <sup>1</sup> H NMR (500 MHz, CD <sub>3</sub> OD) spectrum of compound <b>6</b>                                                 | S35 |
| <b>Figure S33.</b> The <sup>13</sup> C NMR (125 MHz, CD <sub>3</sub> OD) spectrum of compound <b>6</b>                                                | S36 |
| <b>Figure S34.</b> The COSY NMR (500 MHz, CD <sub>3</sub> OD) spectrum of compound <b>6</b>                                                           | S37 |
| <b>Figure S35.</b> The HSQC NMR (500 MHz, CD <sub>3</sub> OD) spectrum of compound <b>6</b>                                                           | S38 |
| <b>Figure S36.</b> The HMBC NMR (500 MHz, CD <sub>3</sub> OD) spectrum of compound <b>6</b>                                                           | S39 |
| <b>Figure S37.</b> The NOESY NMR (500 MHz, CD <sub>3</sub> OD) spectrum of compound <b>6</b>                                                          | S40 |
| <b>Figure S38.</b> Energy minimized conformation of <b>6</b> at the basis set def-SV(P)<br>for all atoms and functional B3LYP/DFT level.              | S41 |
| <b>Figure S39.</b> Energy minimized conformation of <i>ent</i> - <b>6</b> at the basis set def-SV(P)<br>for all atoms and functional B3LYP/DFT level. | S41 |
| <b>Table S1.</b> Energy minimized coordinates of <b>6</b> at the basis set def-SV(P) for all atoms (Å )                                               | S42 |
| <b>Table S2.</b> Energy minimized coordinates of <i>ent</i> - <b>6</b> at the basis set def-SV(P) for all atoms (Å )                                  | S43 |

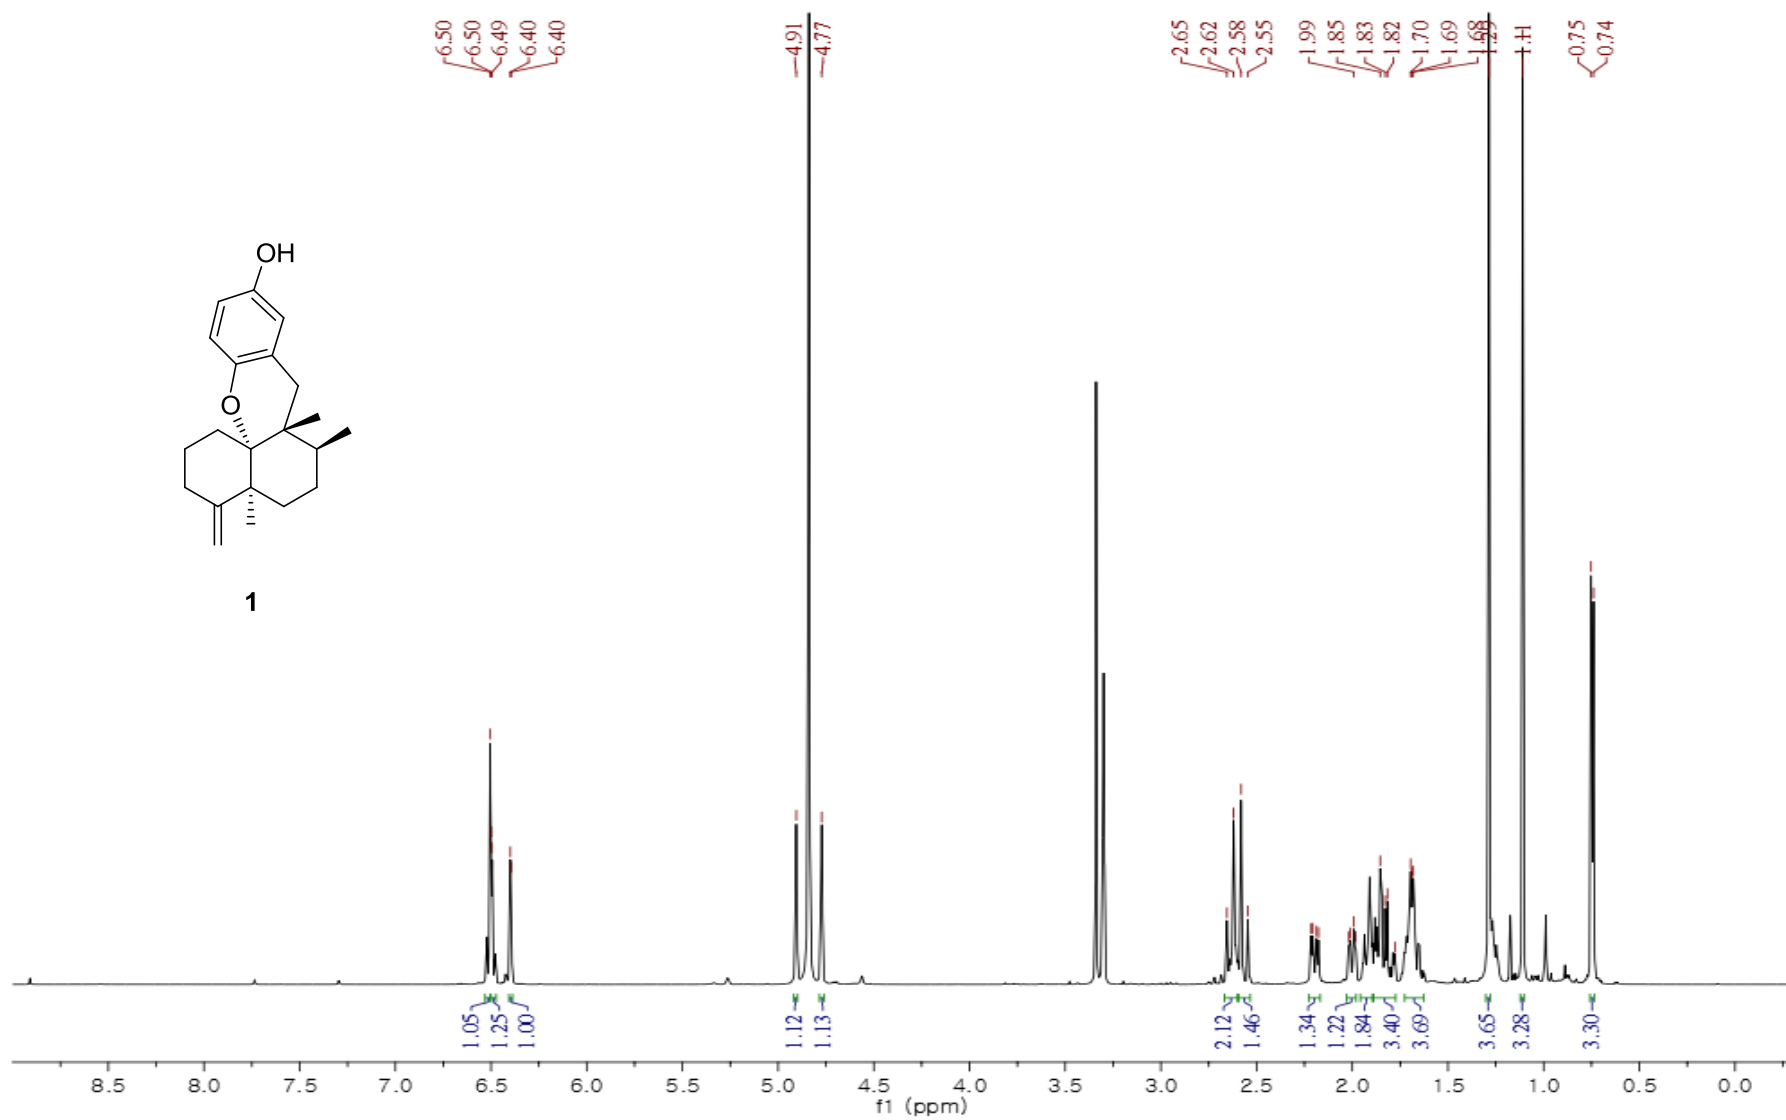

**Figure S1.** The <sup>1</sup>H NMR (500 MHz, CD<sub>3</sub>OD) spectrum of compound **1**

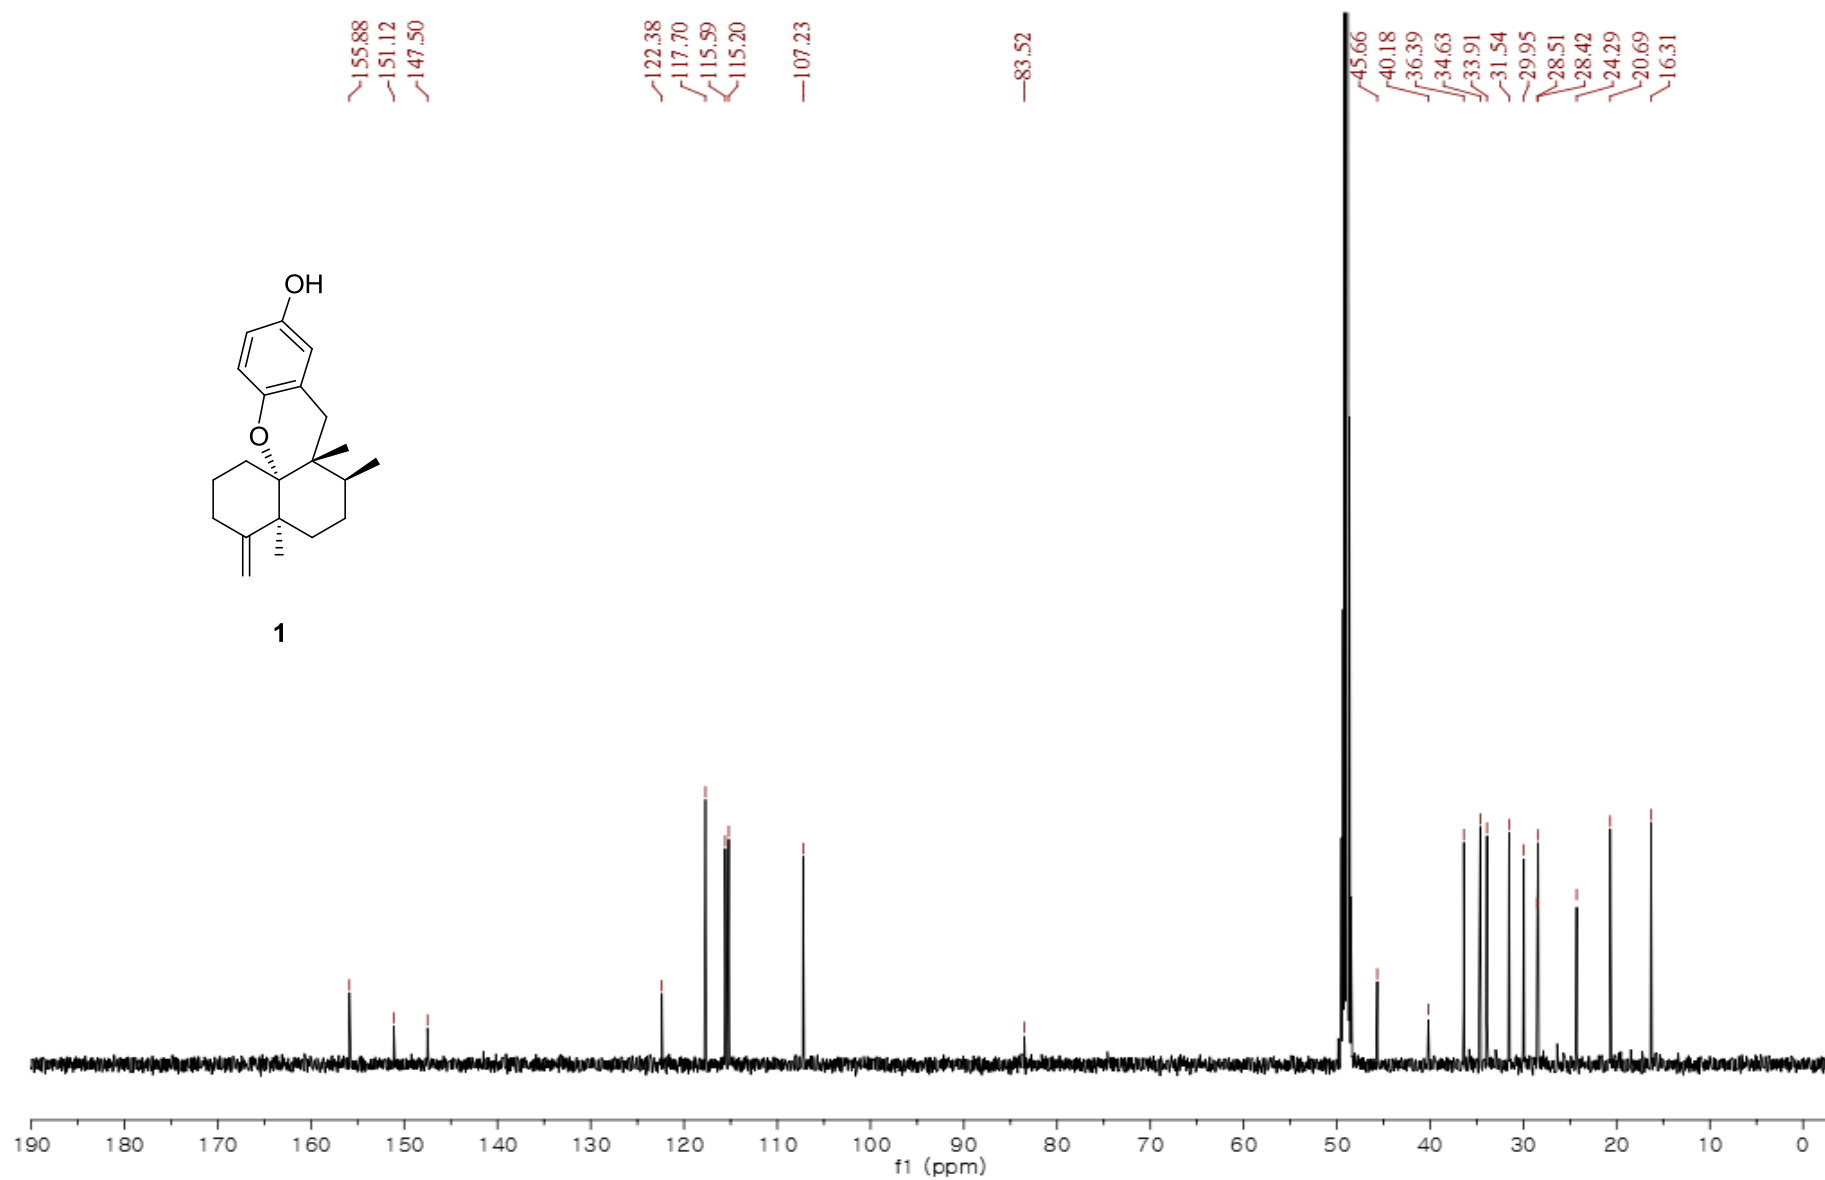

**Figure S2.** The  $^{13}\text{C}$  NMR (125 MHz,  $\text{CD}_3\text{OD}$ ) spectrum of compound **1**

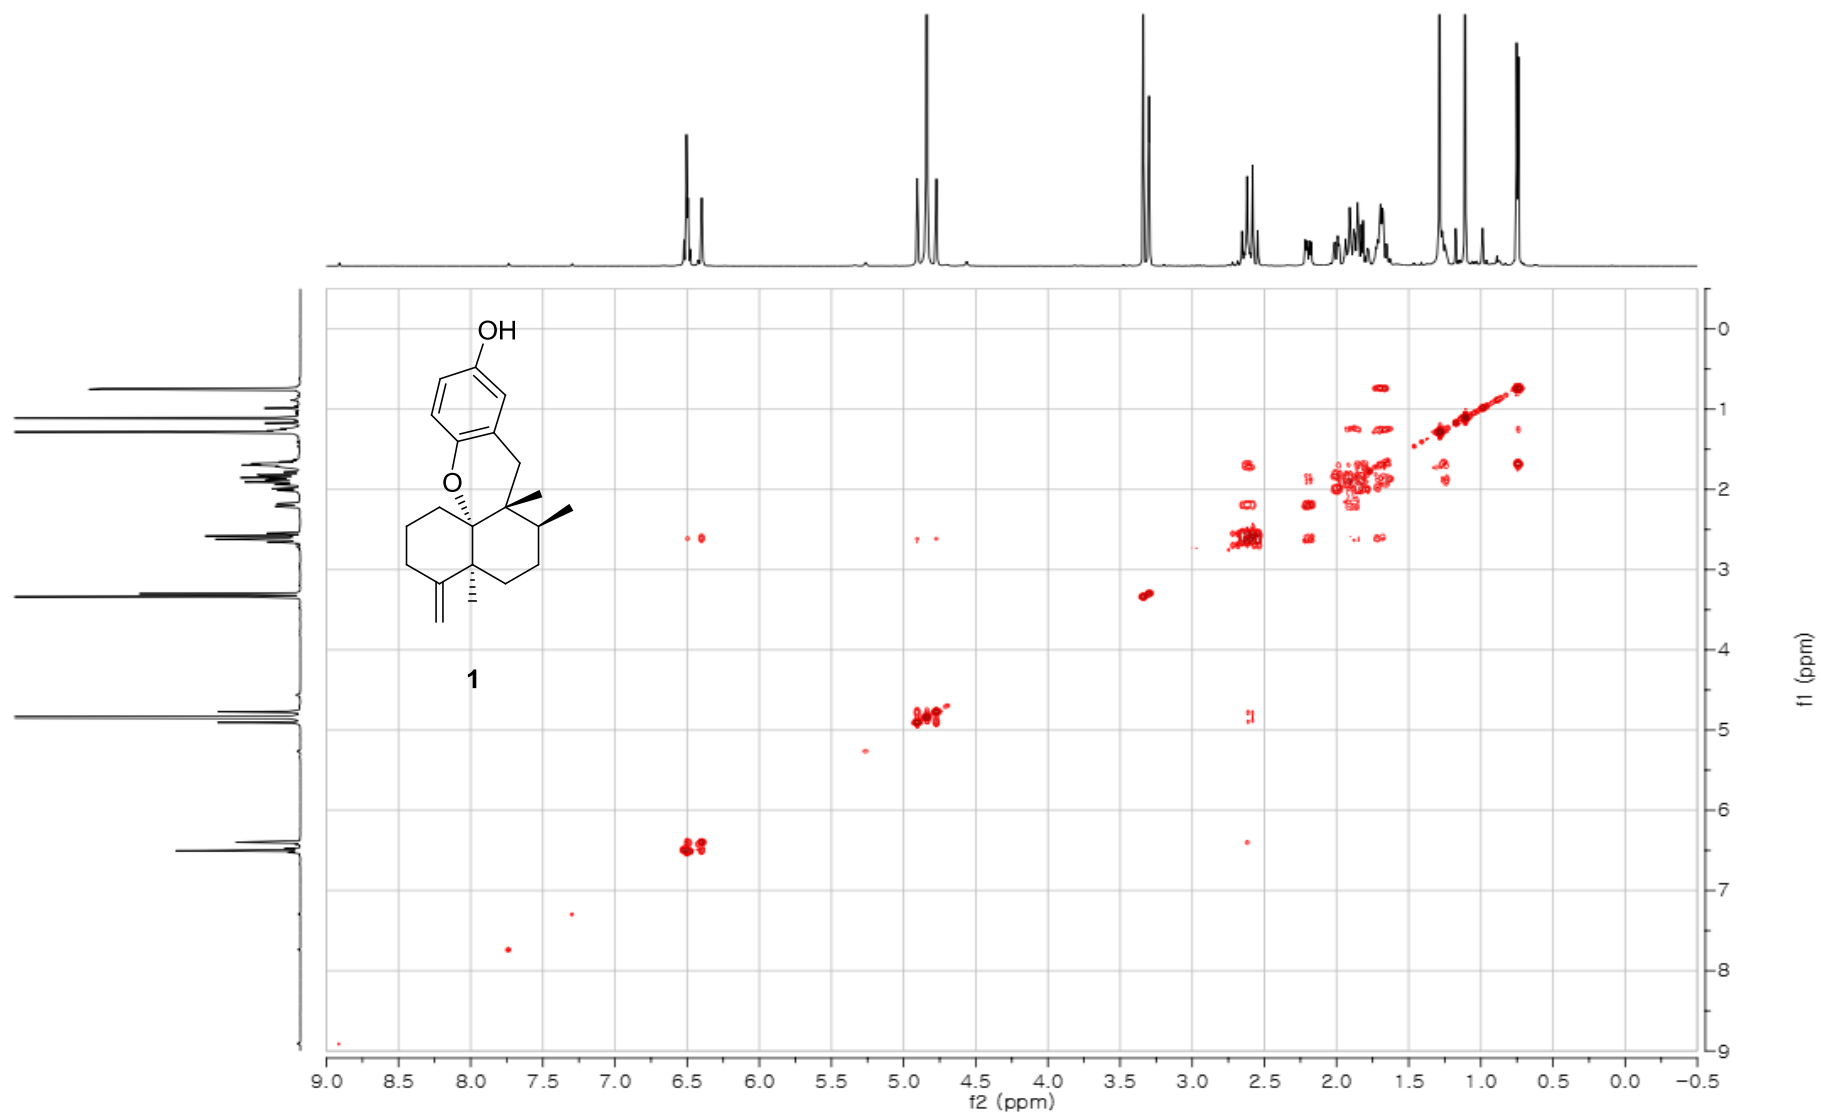

**Figure S3.** The COSY NMR (500 MHz, CD<sub>3</sub>OD) spectrum of compound **1**

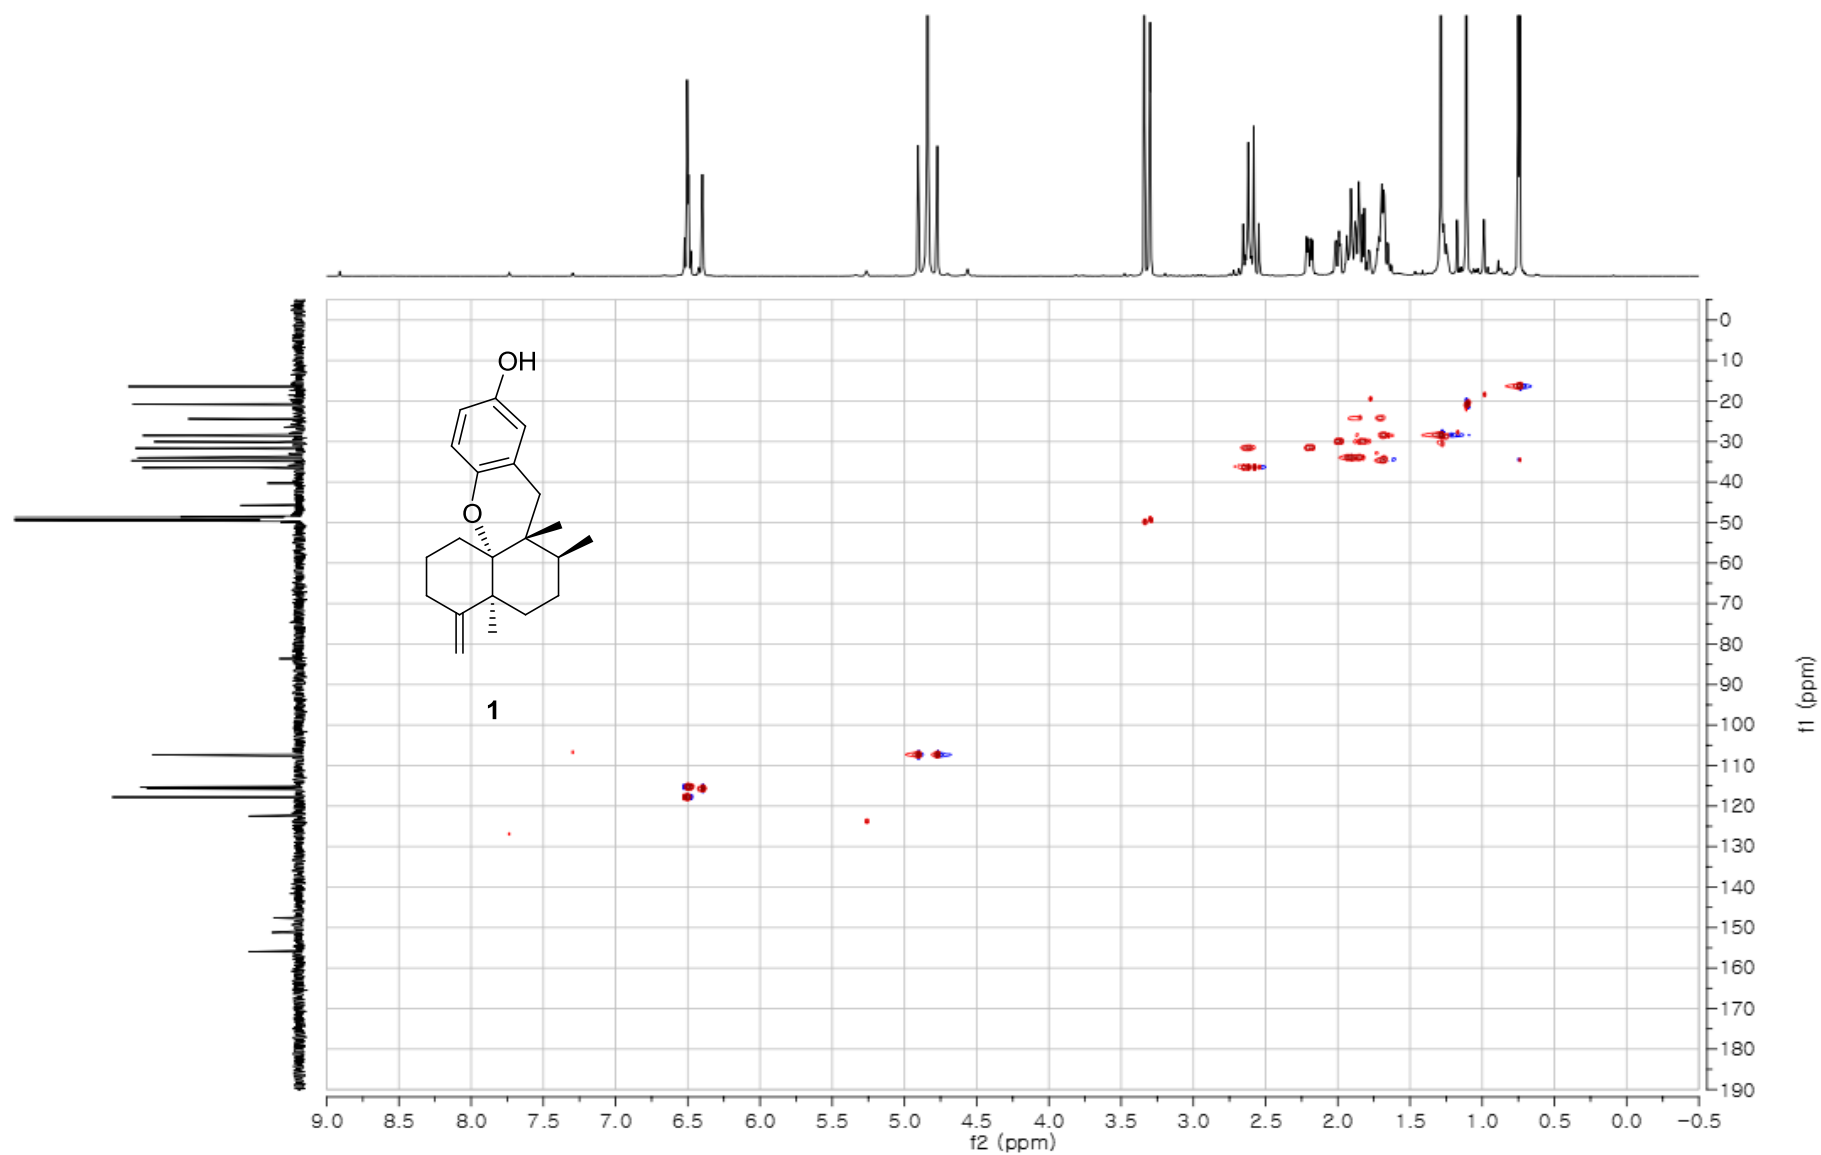

**Figure S4.** The HSQC NMR (500 MHz, CD<sub>3</sub>OD) spectrum of compound **1**

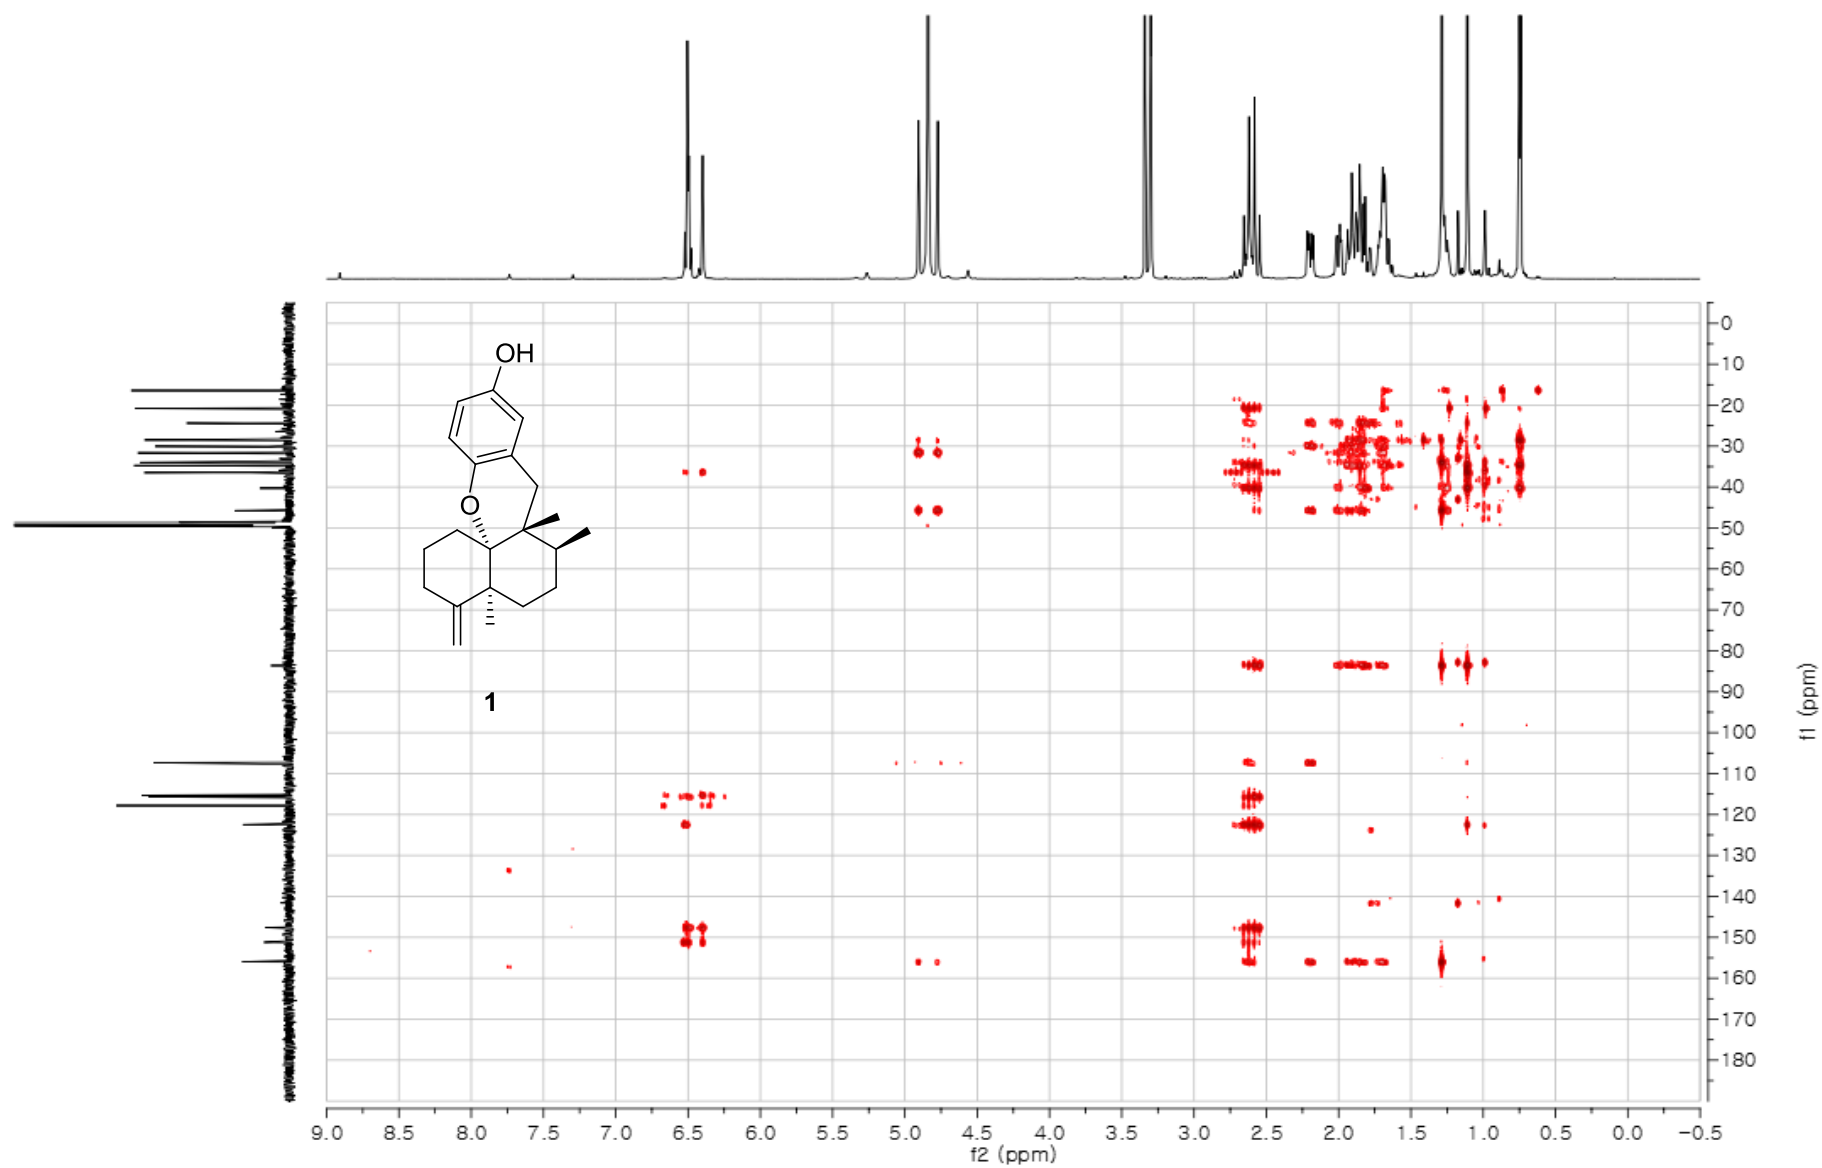

**Figure S5.** The HMBC NMR (500 MHz,  $\text{CD}_3\text{OD}$ ) spectrum of compound **1**



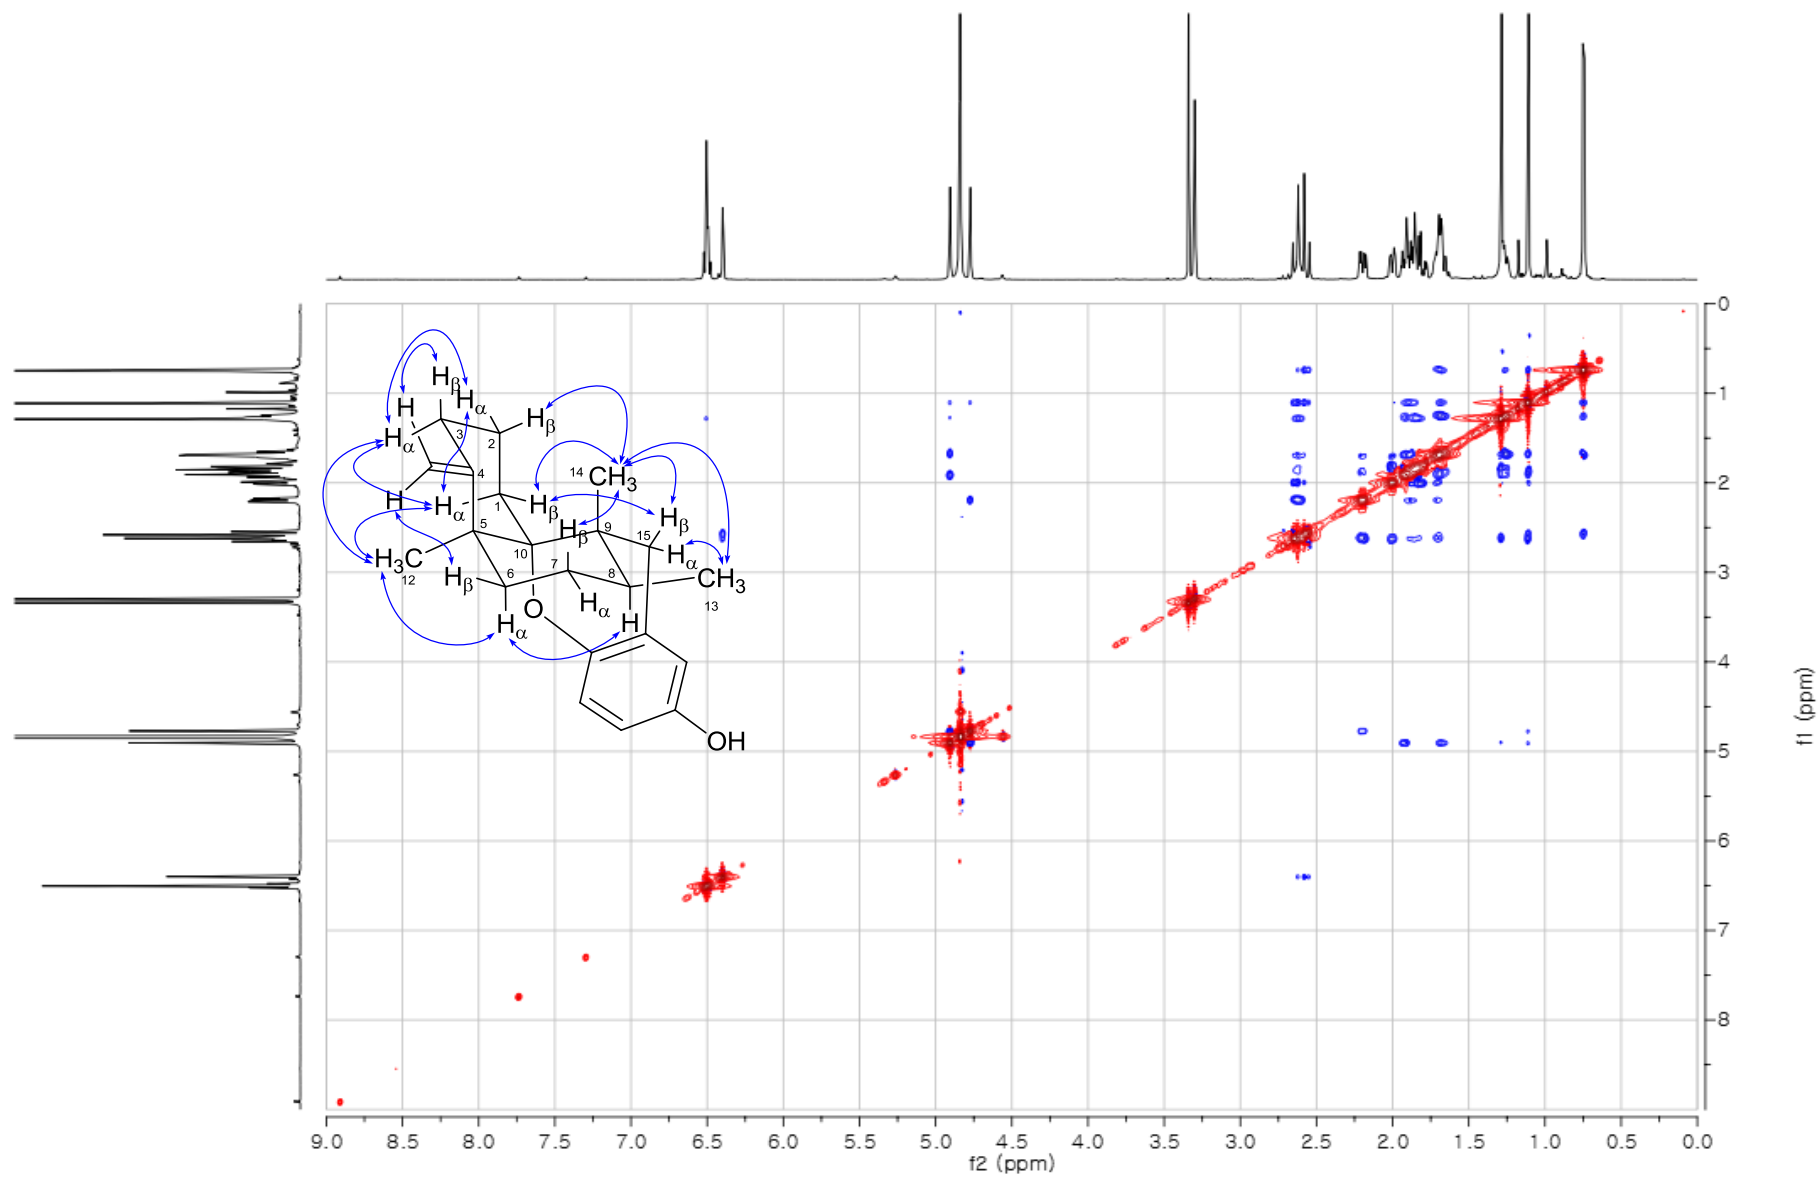

**Figure S6.** The NOESY NMR (500 MHz, CD<sub>3</sub>OD) spectrum of compound **1**

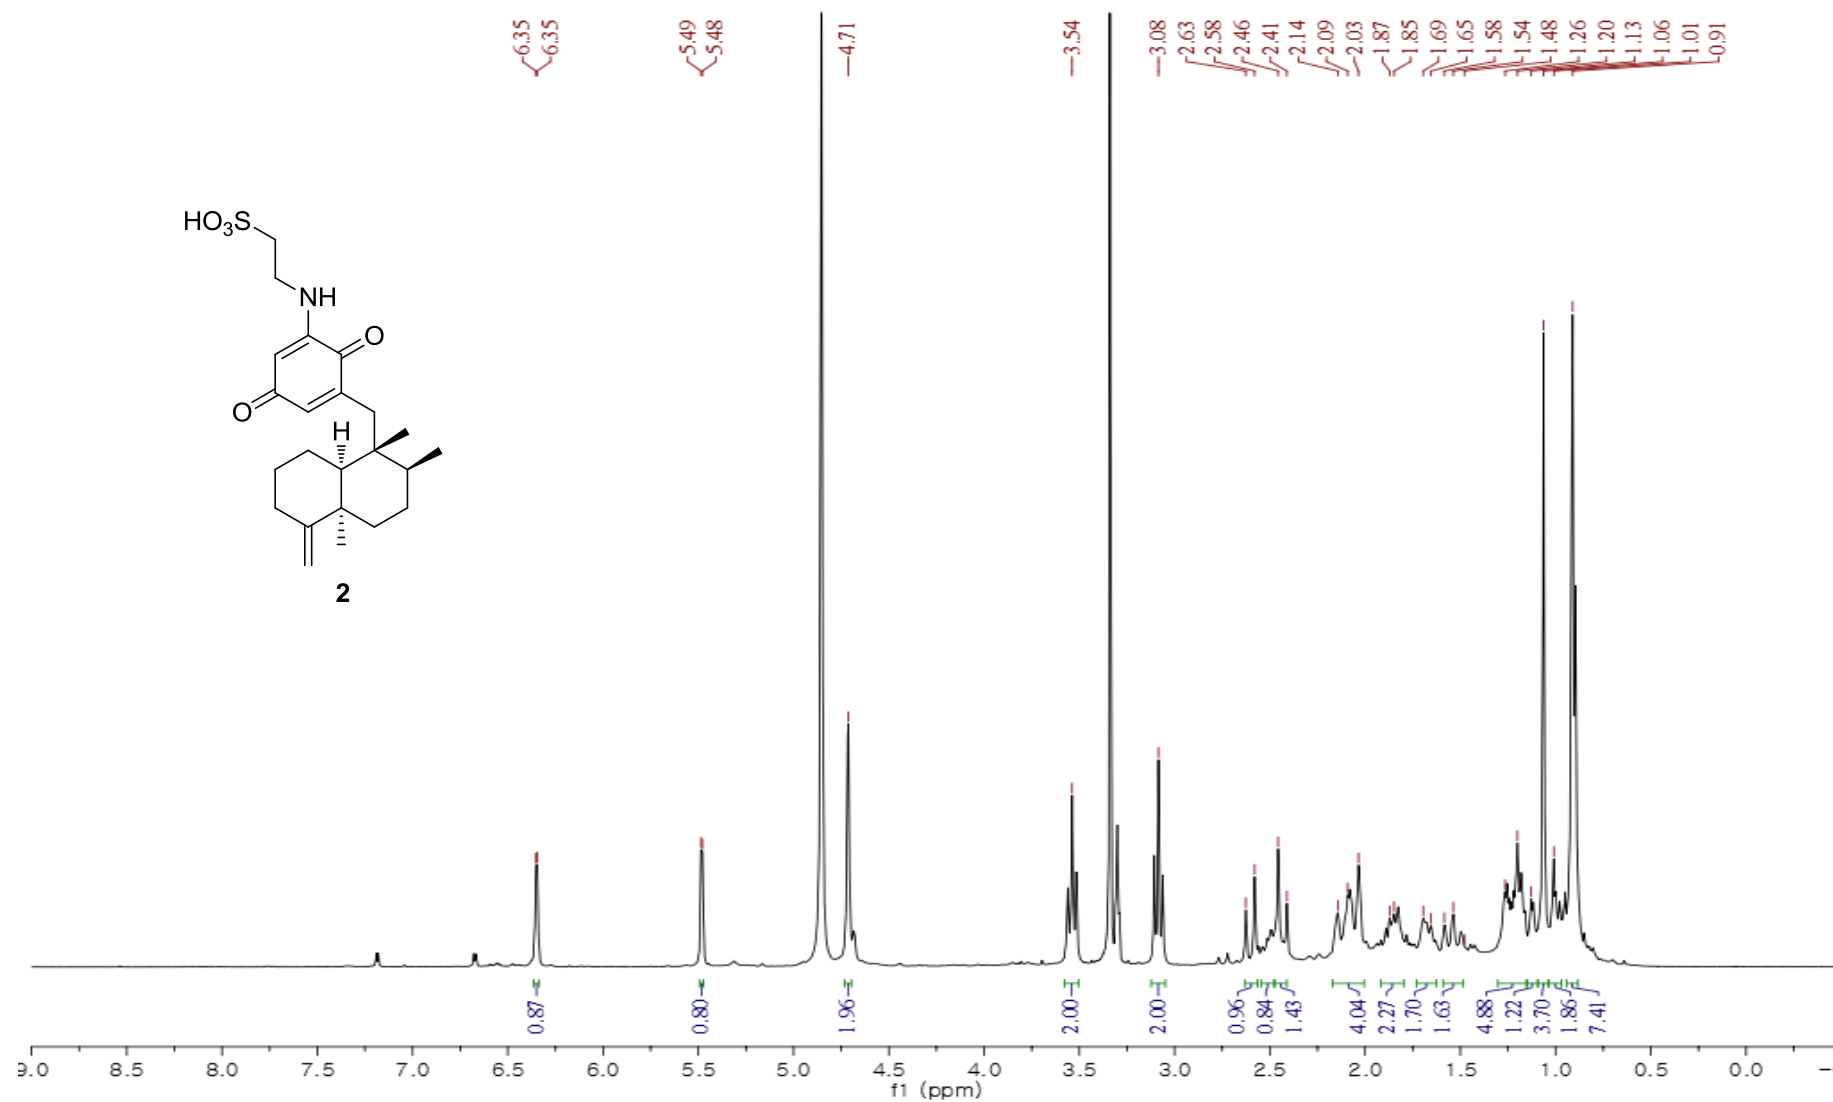

**Figure S7.** The  $^1\text{H}$  NMR (500 MHz,  $\text{CD}_3\text{OD}$ ) spectrum of compound **2**

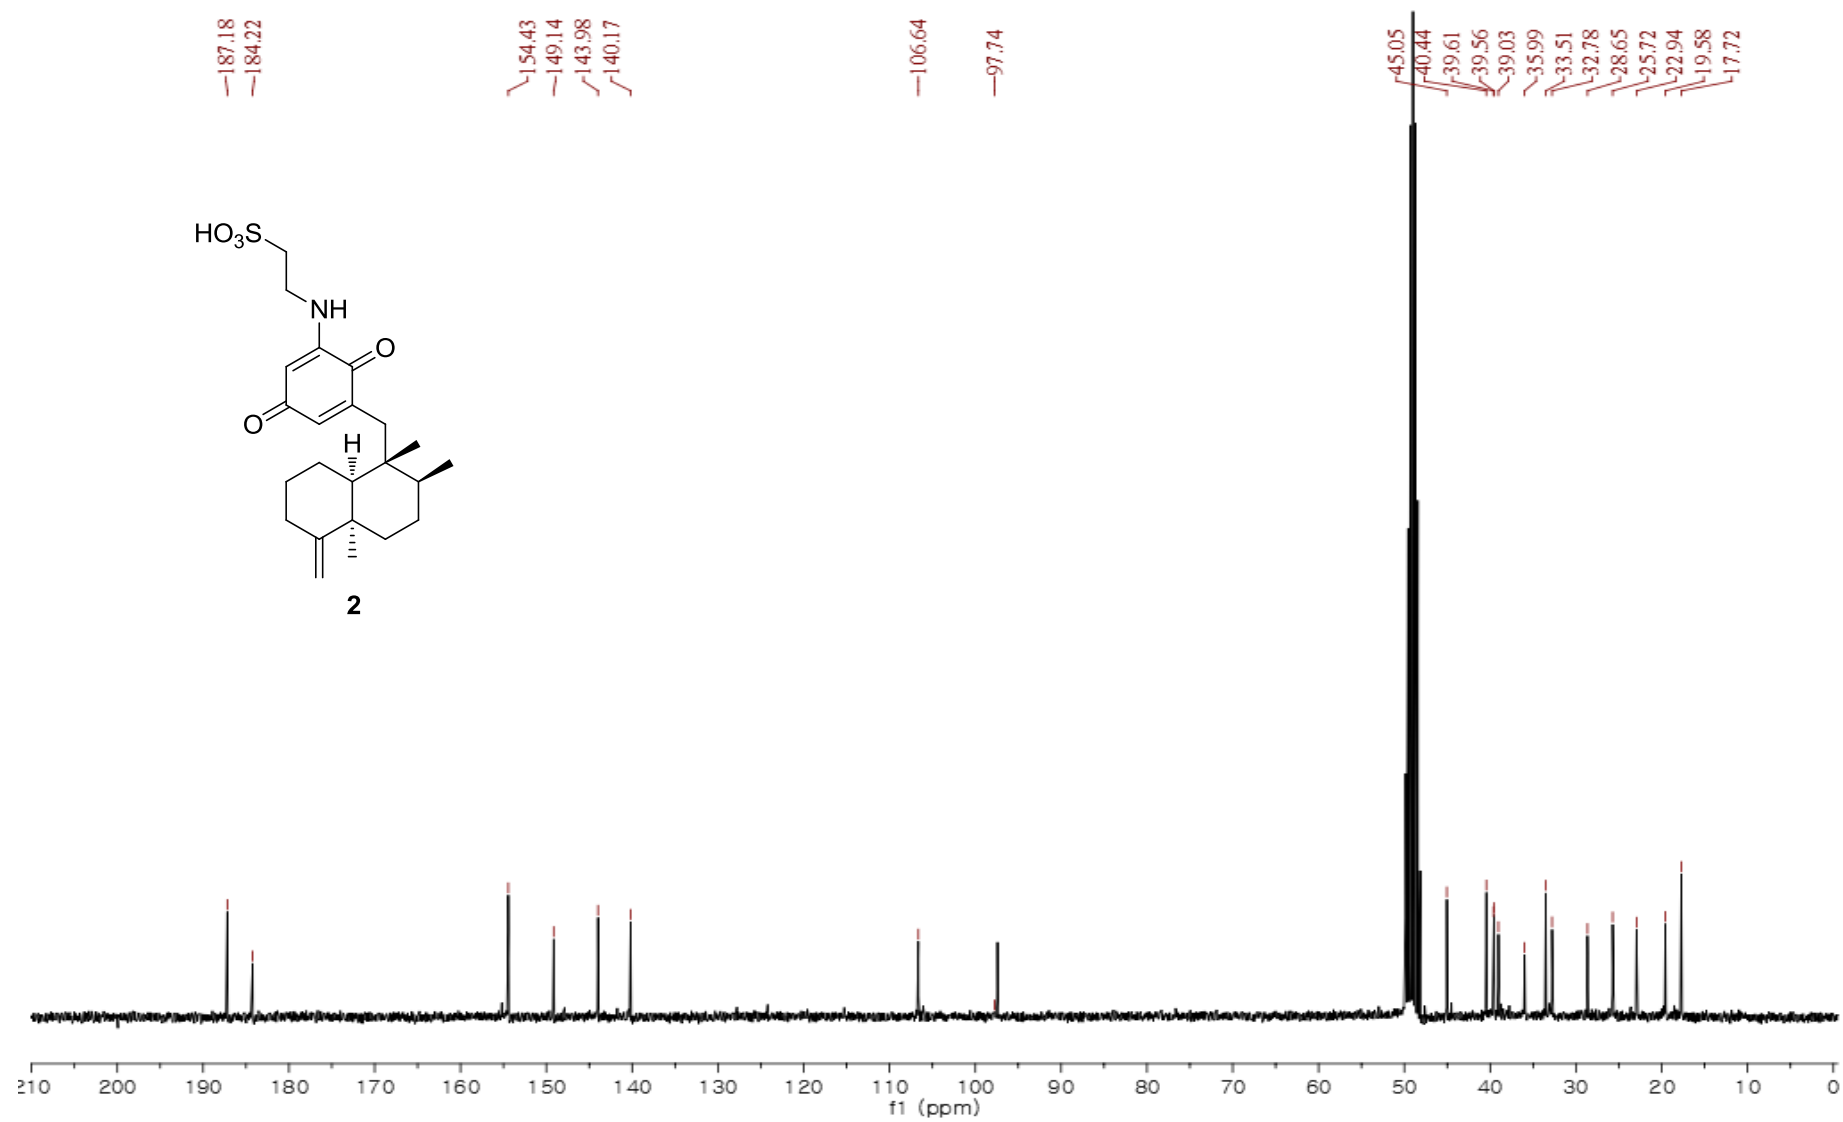

**Figure S8.** The  $^{13}\text{C}$  NMR (125 MHz,  $\text{CD}_3\text{OD}$ ) spectrum of compound 2

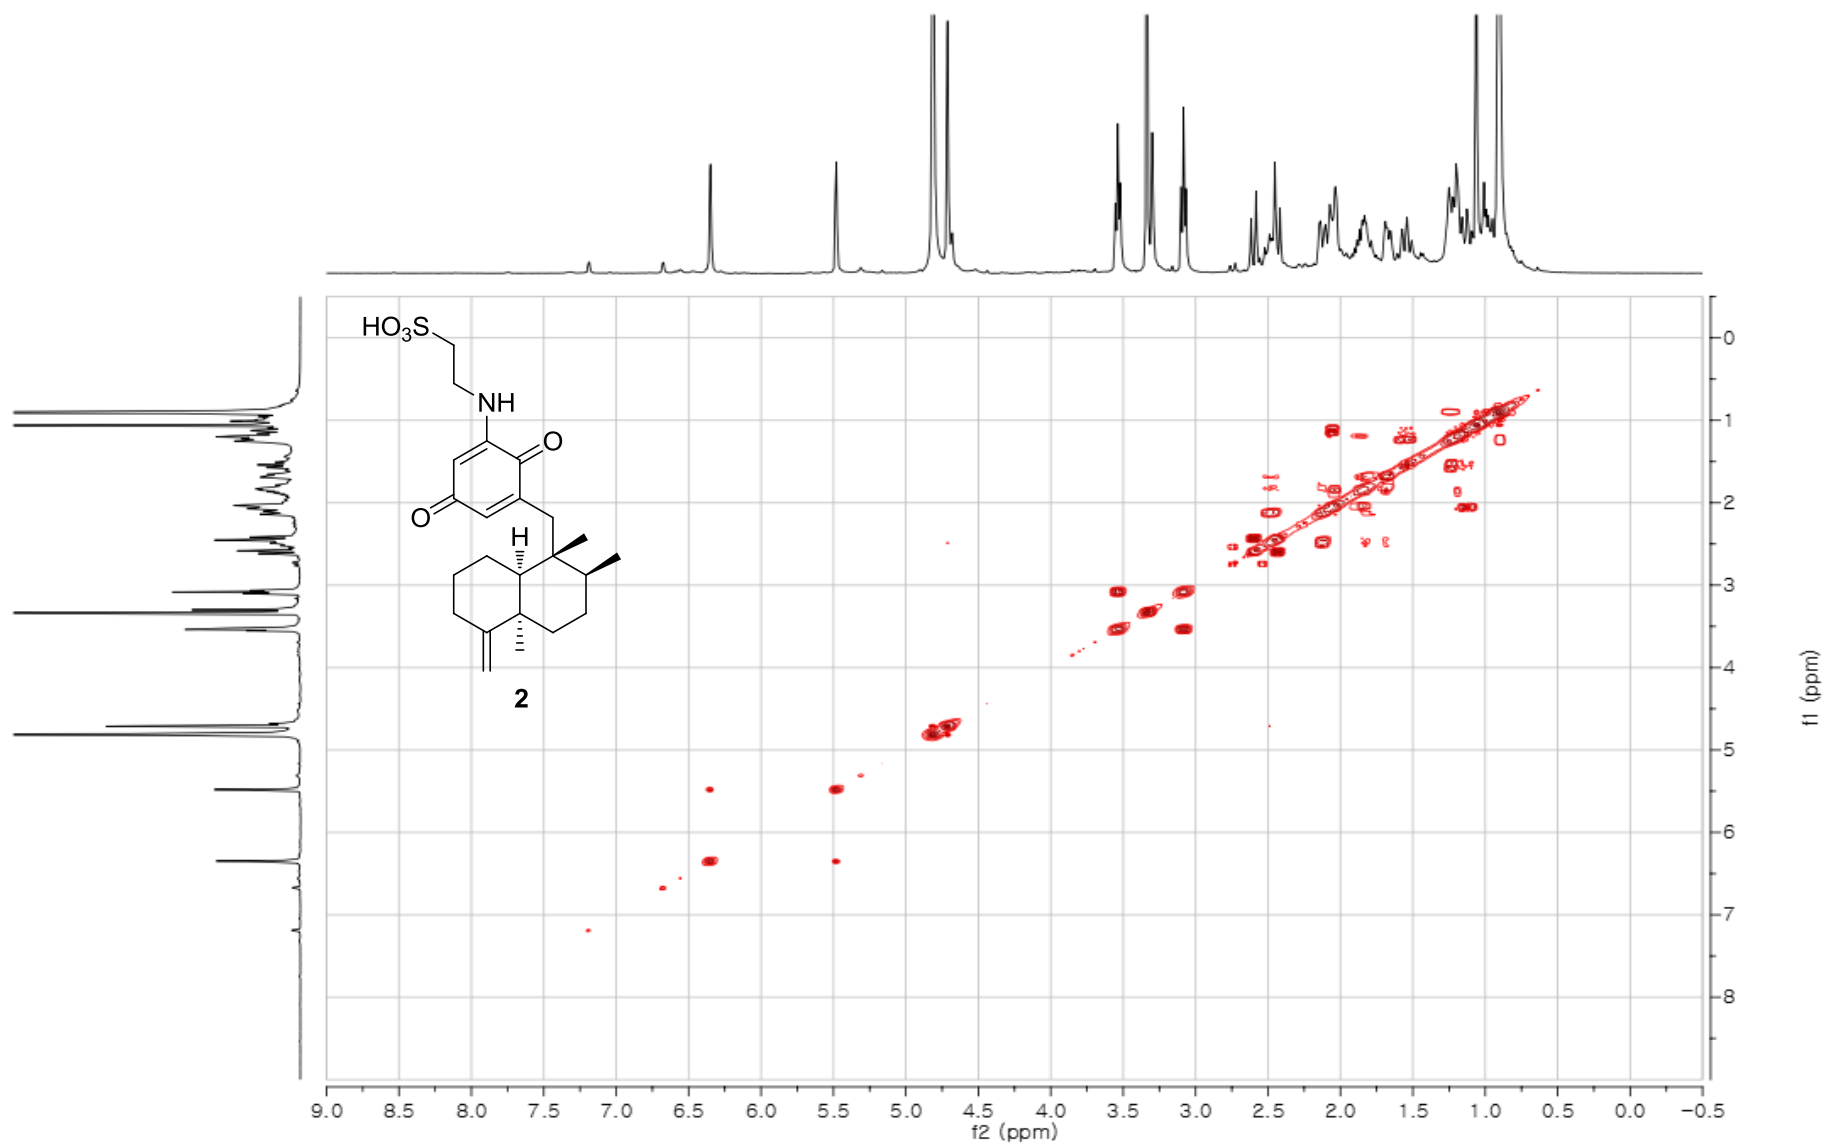

**Figure S9.** The COSY NMR (500 MHz, CD<sub>3</sub>OD) spectrum of compound **2**

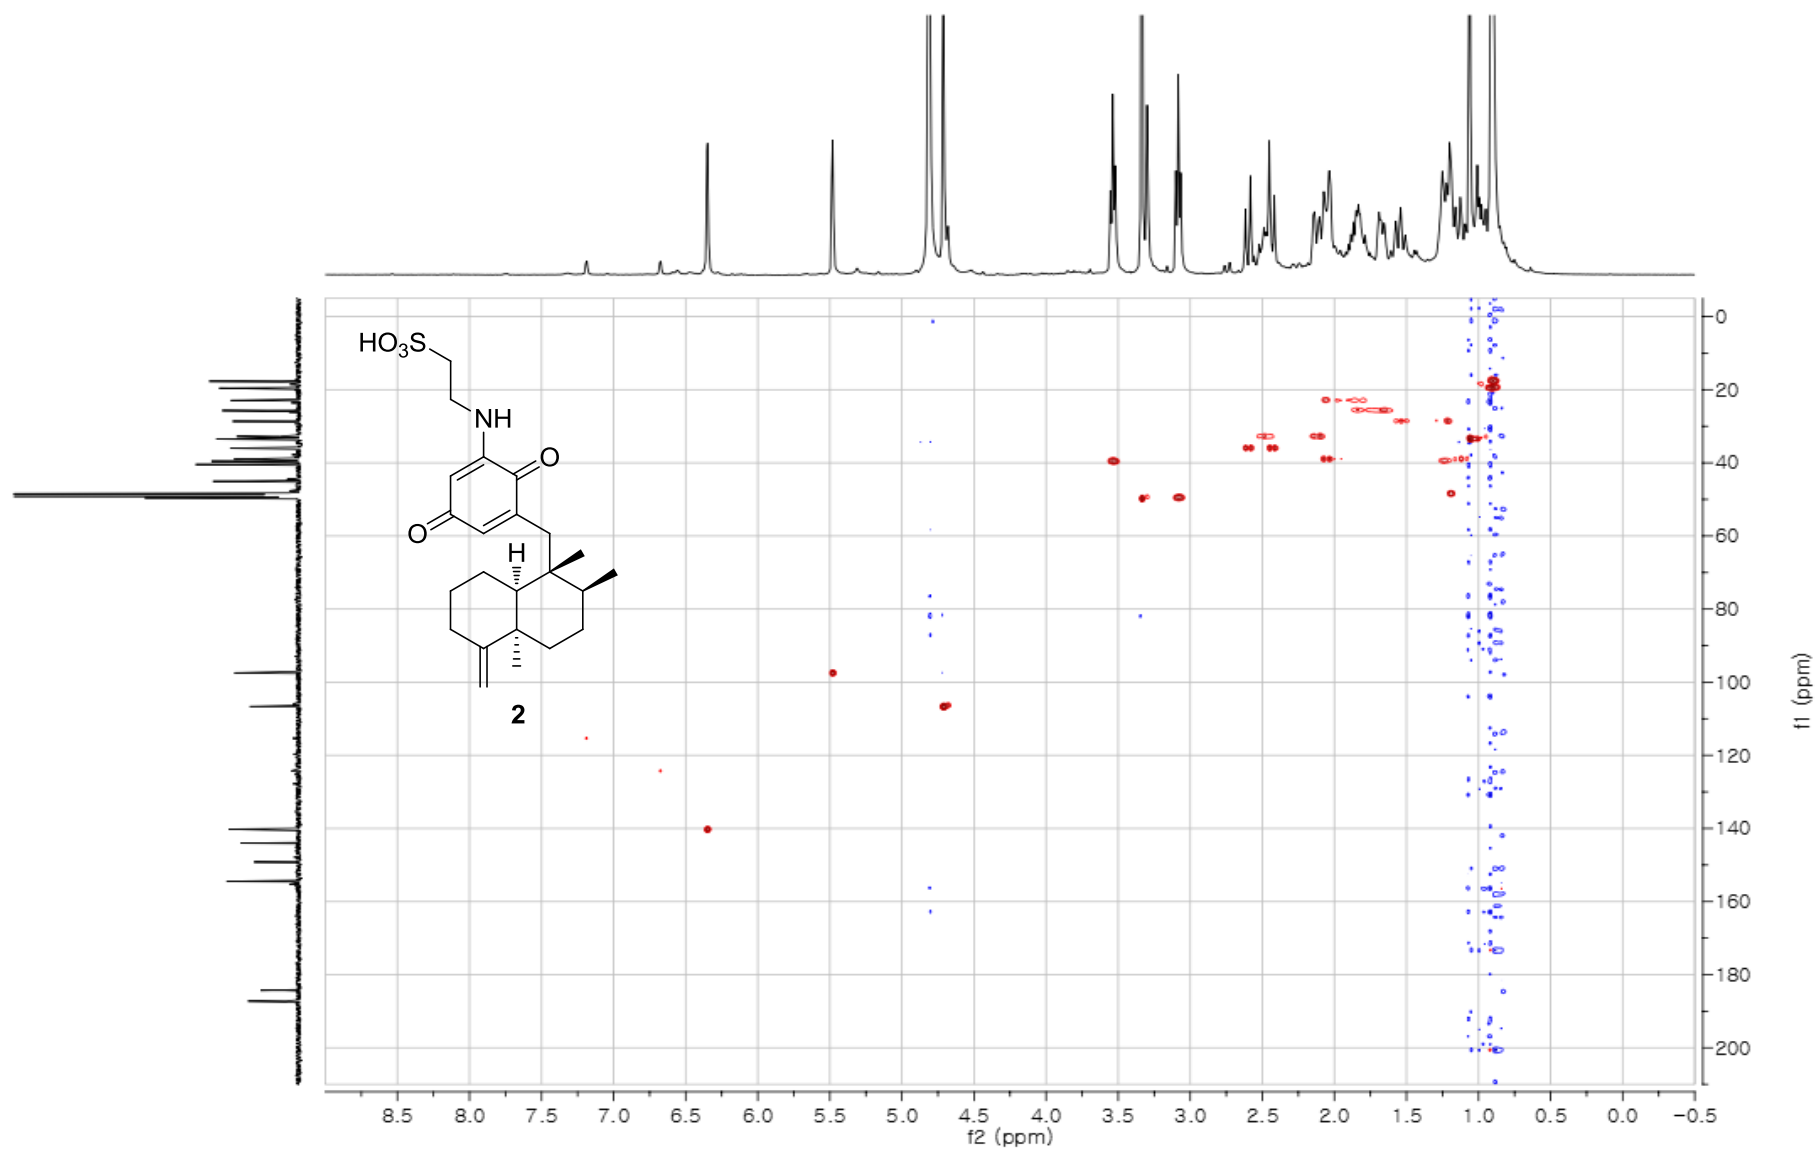

**Figure S10.** The HSQC NMR (500 MHz,  $\text{CD}_3\text{OD}$ ) spectrum of compound **2**

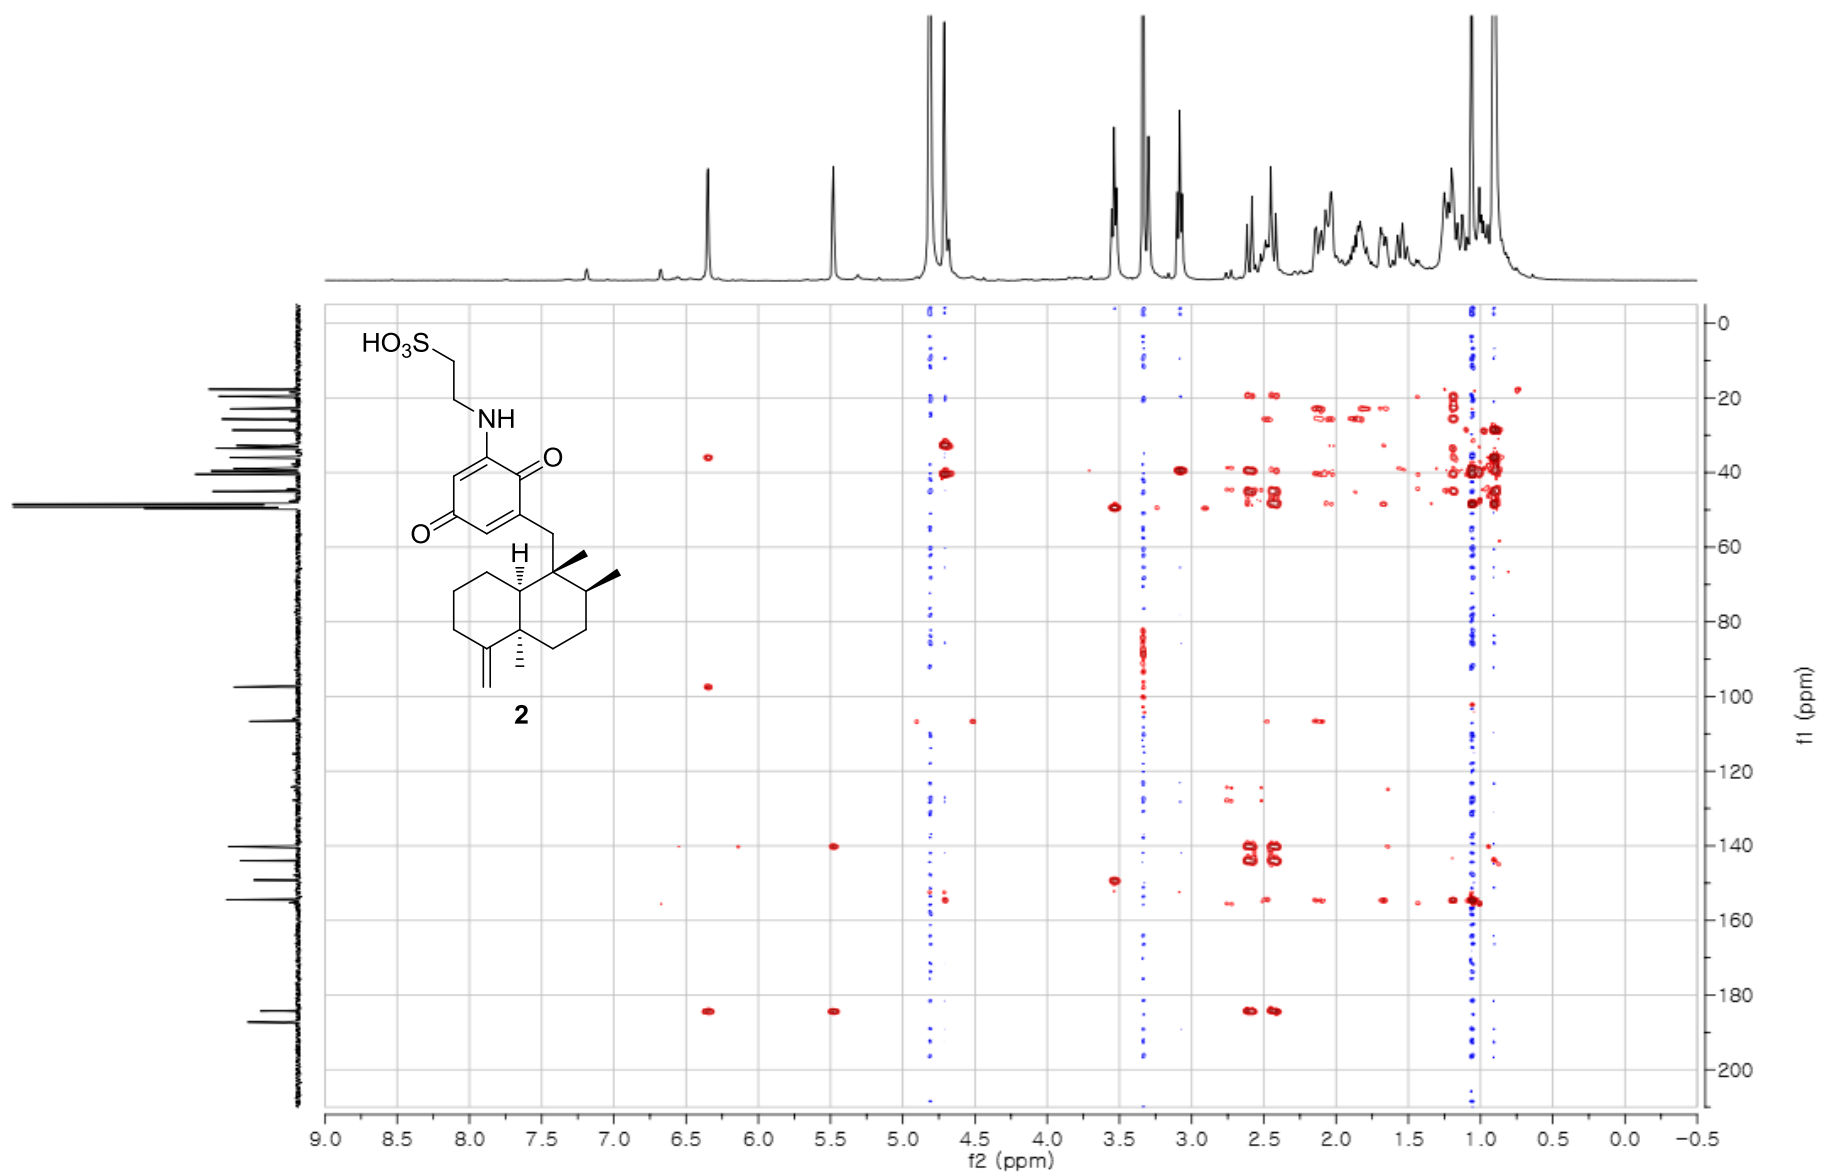

**Figure S11.** The HMBC NMR (500 MHz, CD<sub>3</sub>OD) spectrum of compound **2**

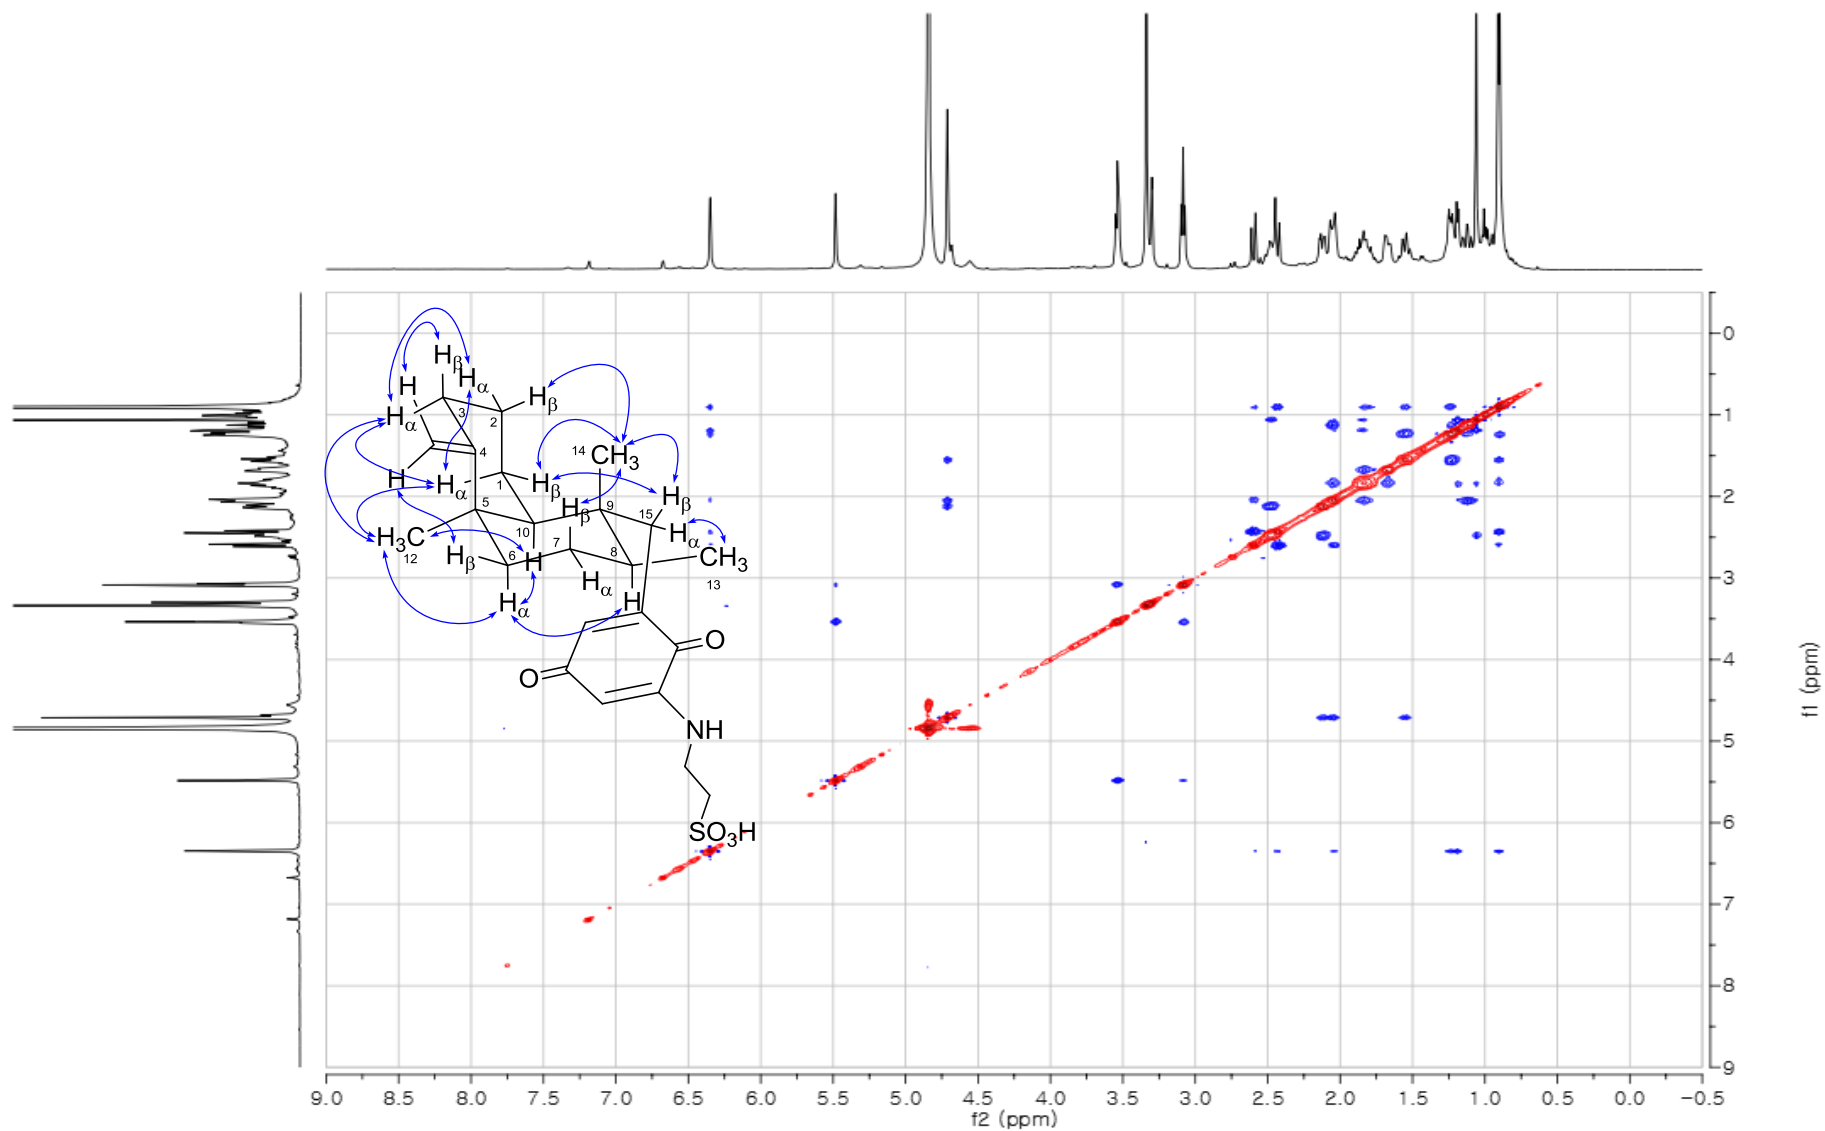

**Figure S12.** The NOESY NMR (500 MHz, CD<sub>3</sub>OD) spectrum of compound **2**

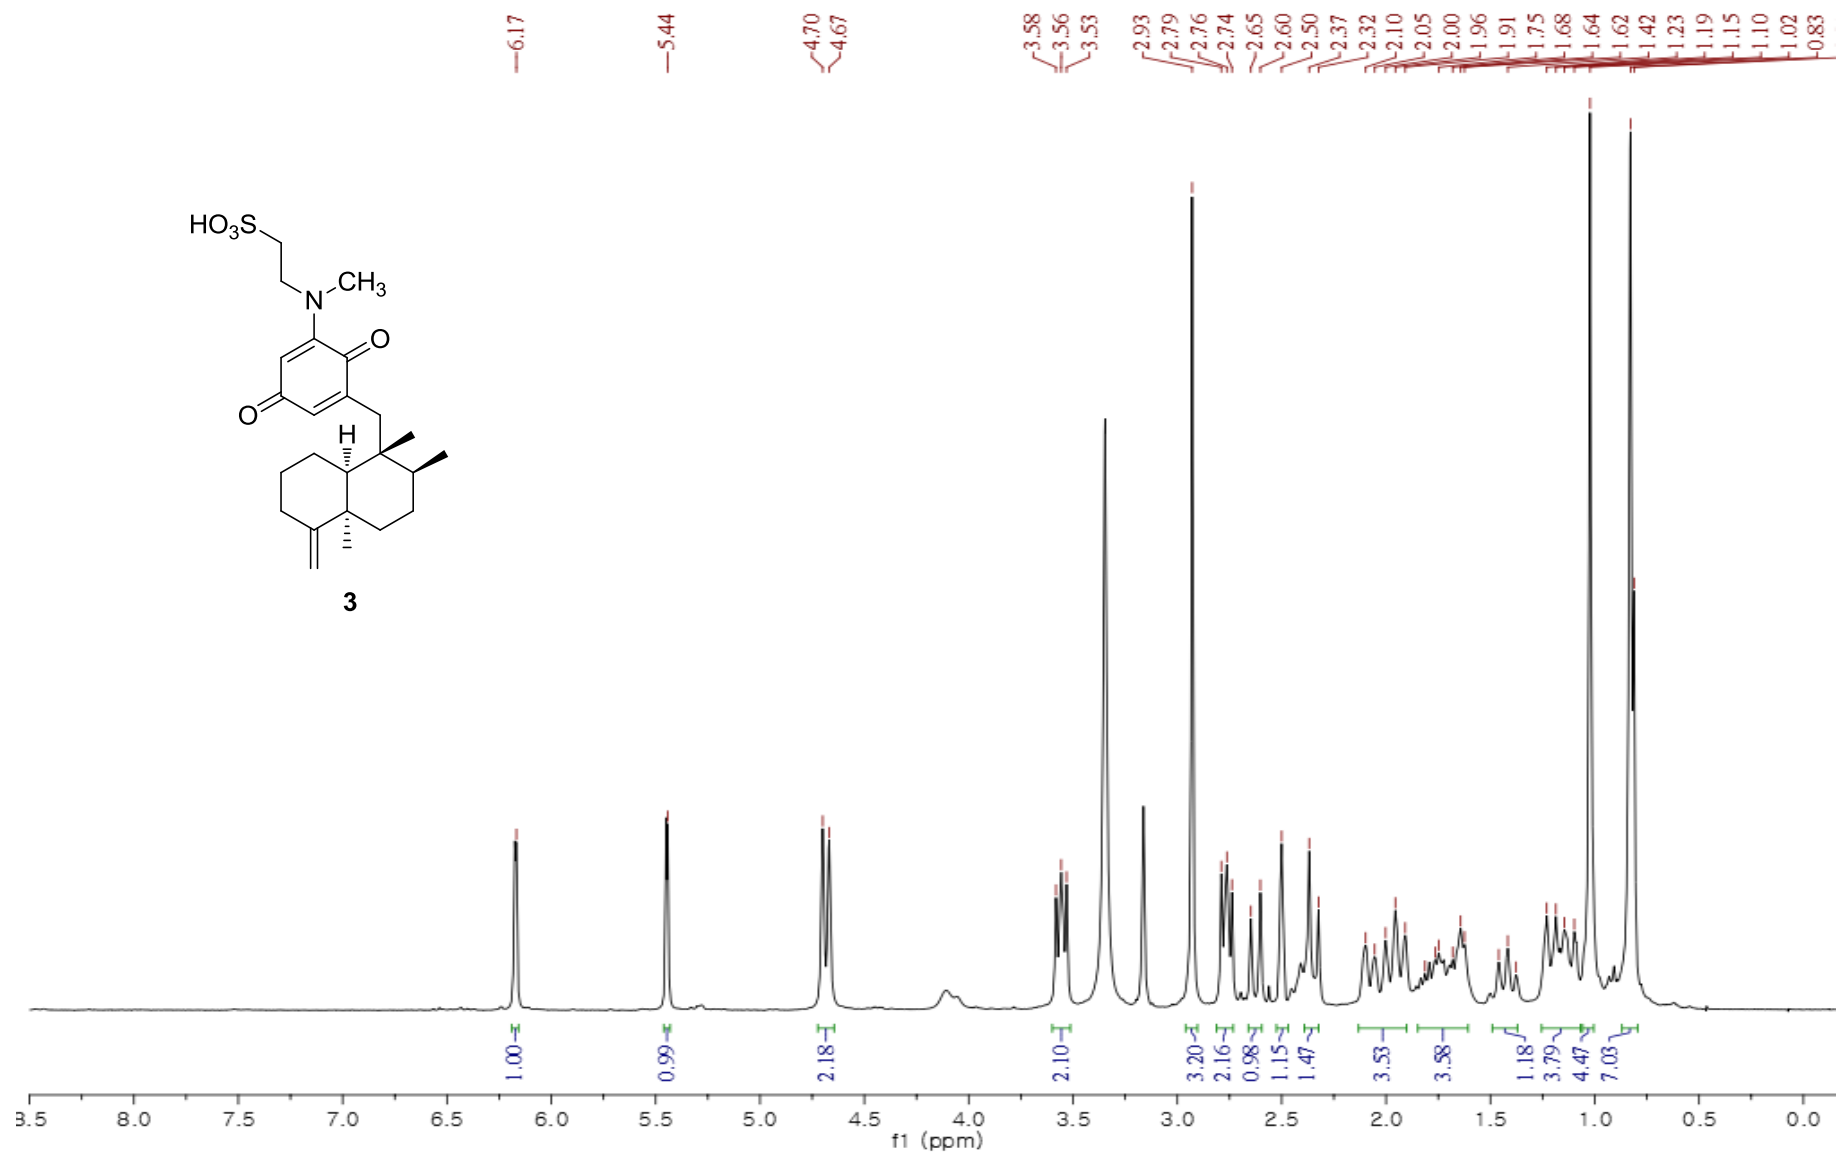

**Figure S13.** The  $^1\text{H}$  NMR (400 MHz,  $\text{DMSO}-d_6$ ) spectrum of compound **3**



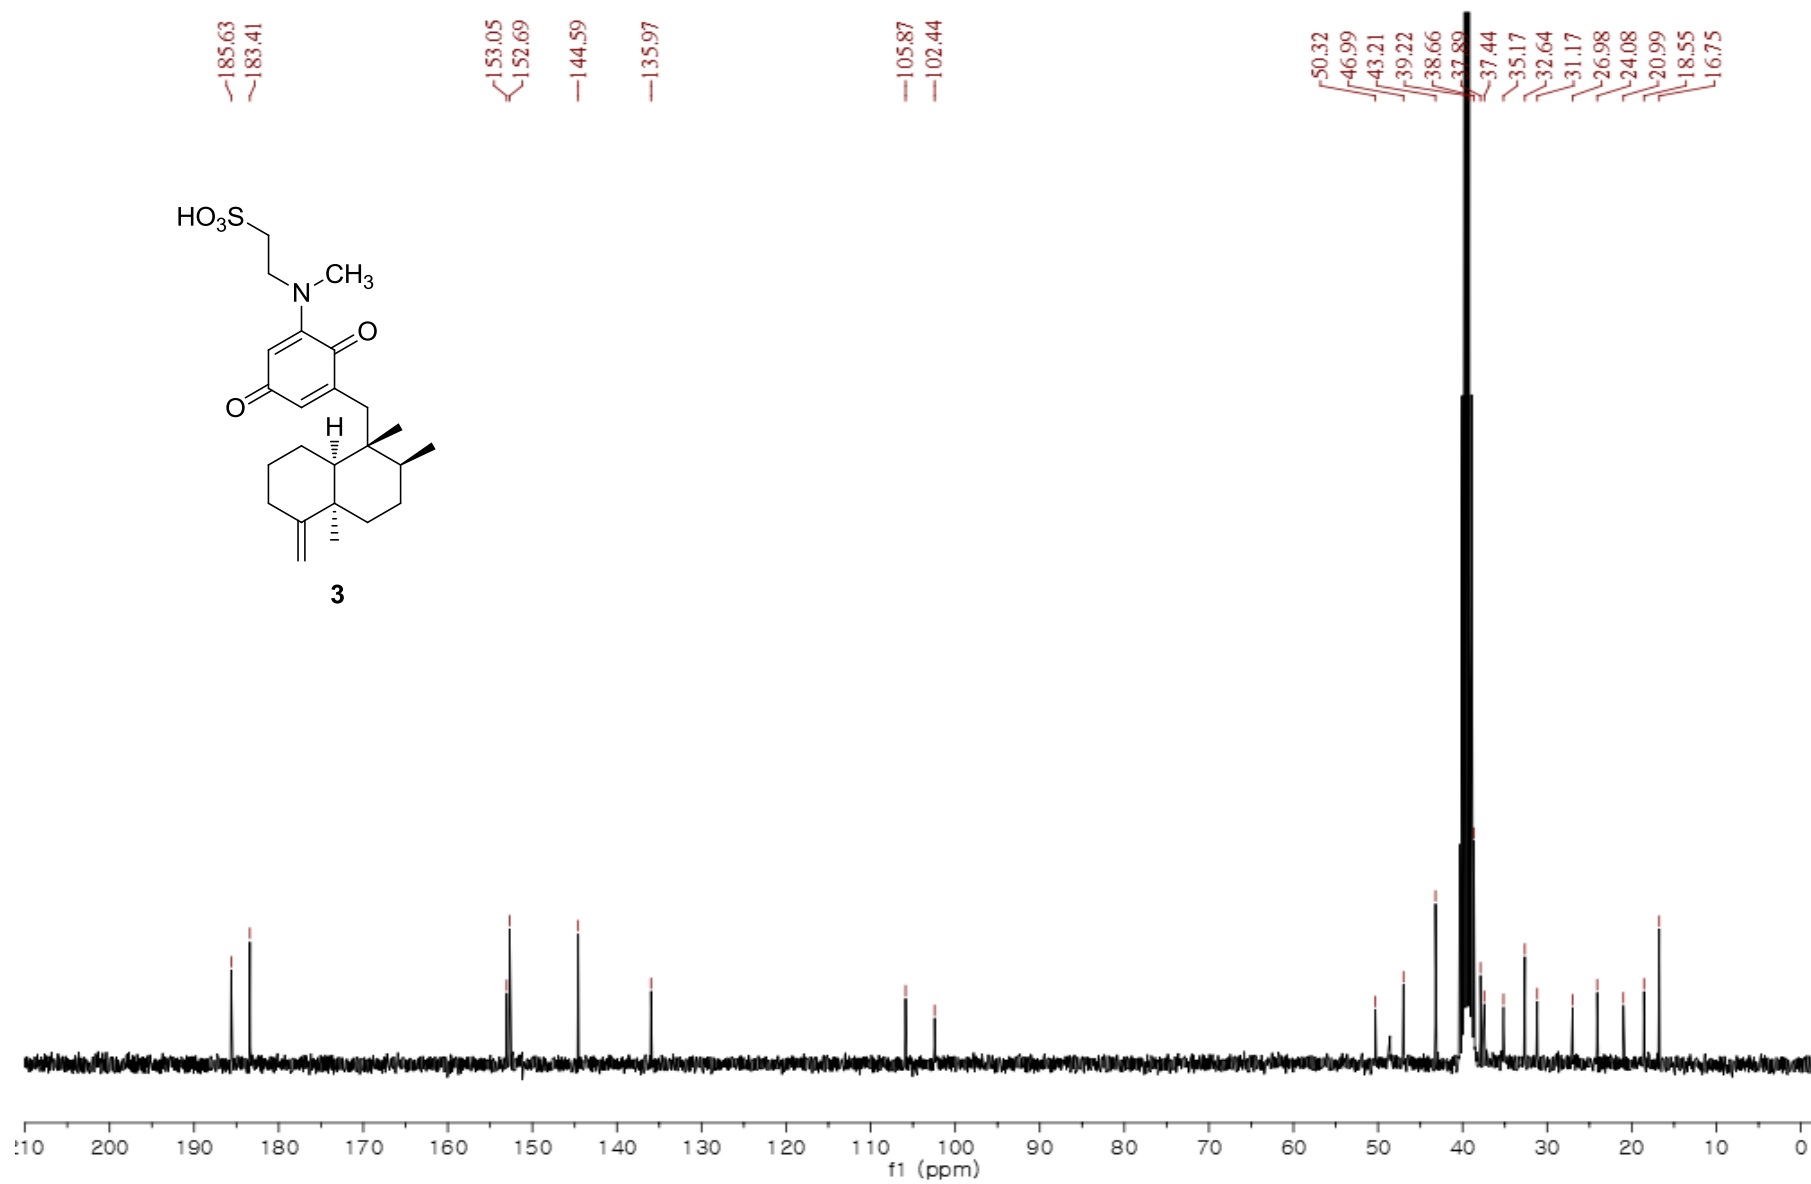

**Figure S14.** The  $^{13}\text{C}$  NMR (100 MHz,  $\text{DMSO}-d_6$ ) spectrum of compound **3**

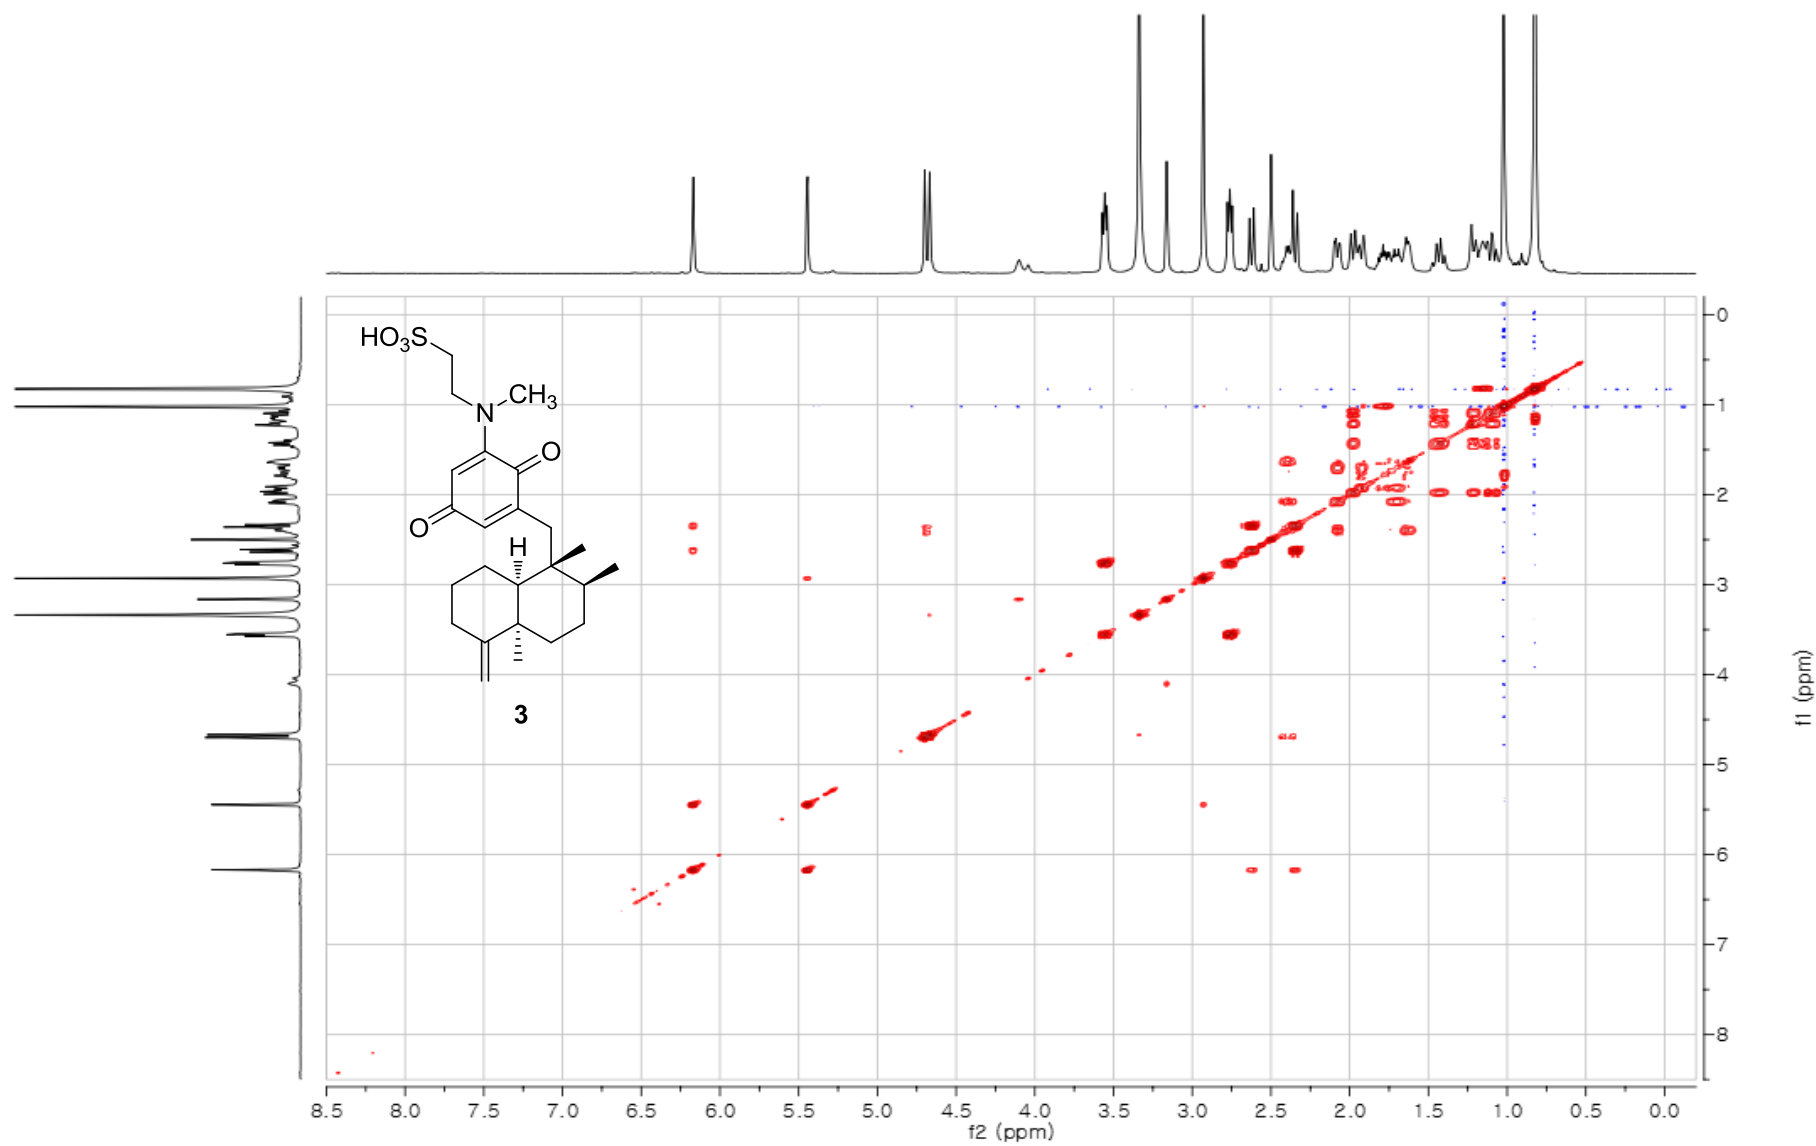

**Figure S15.** The COSY NMR (400 MHz,  $\text{DMSO}-d_6$ ) spectrum of compound **3**

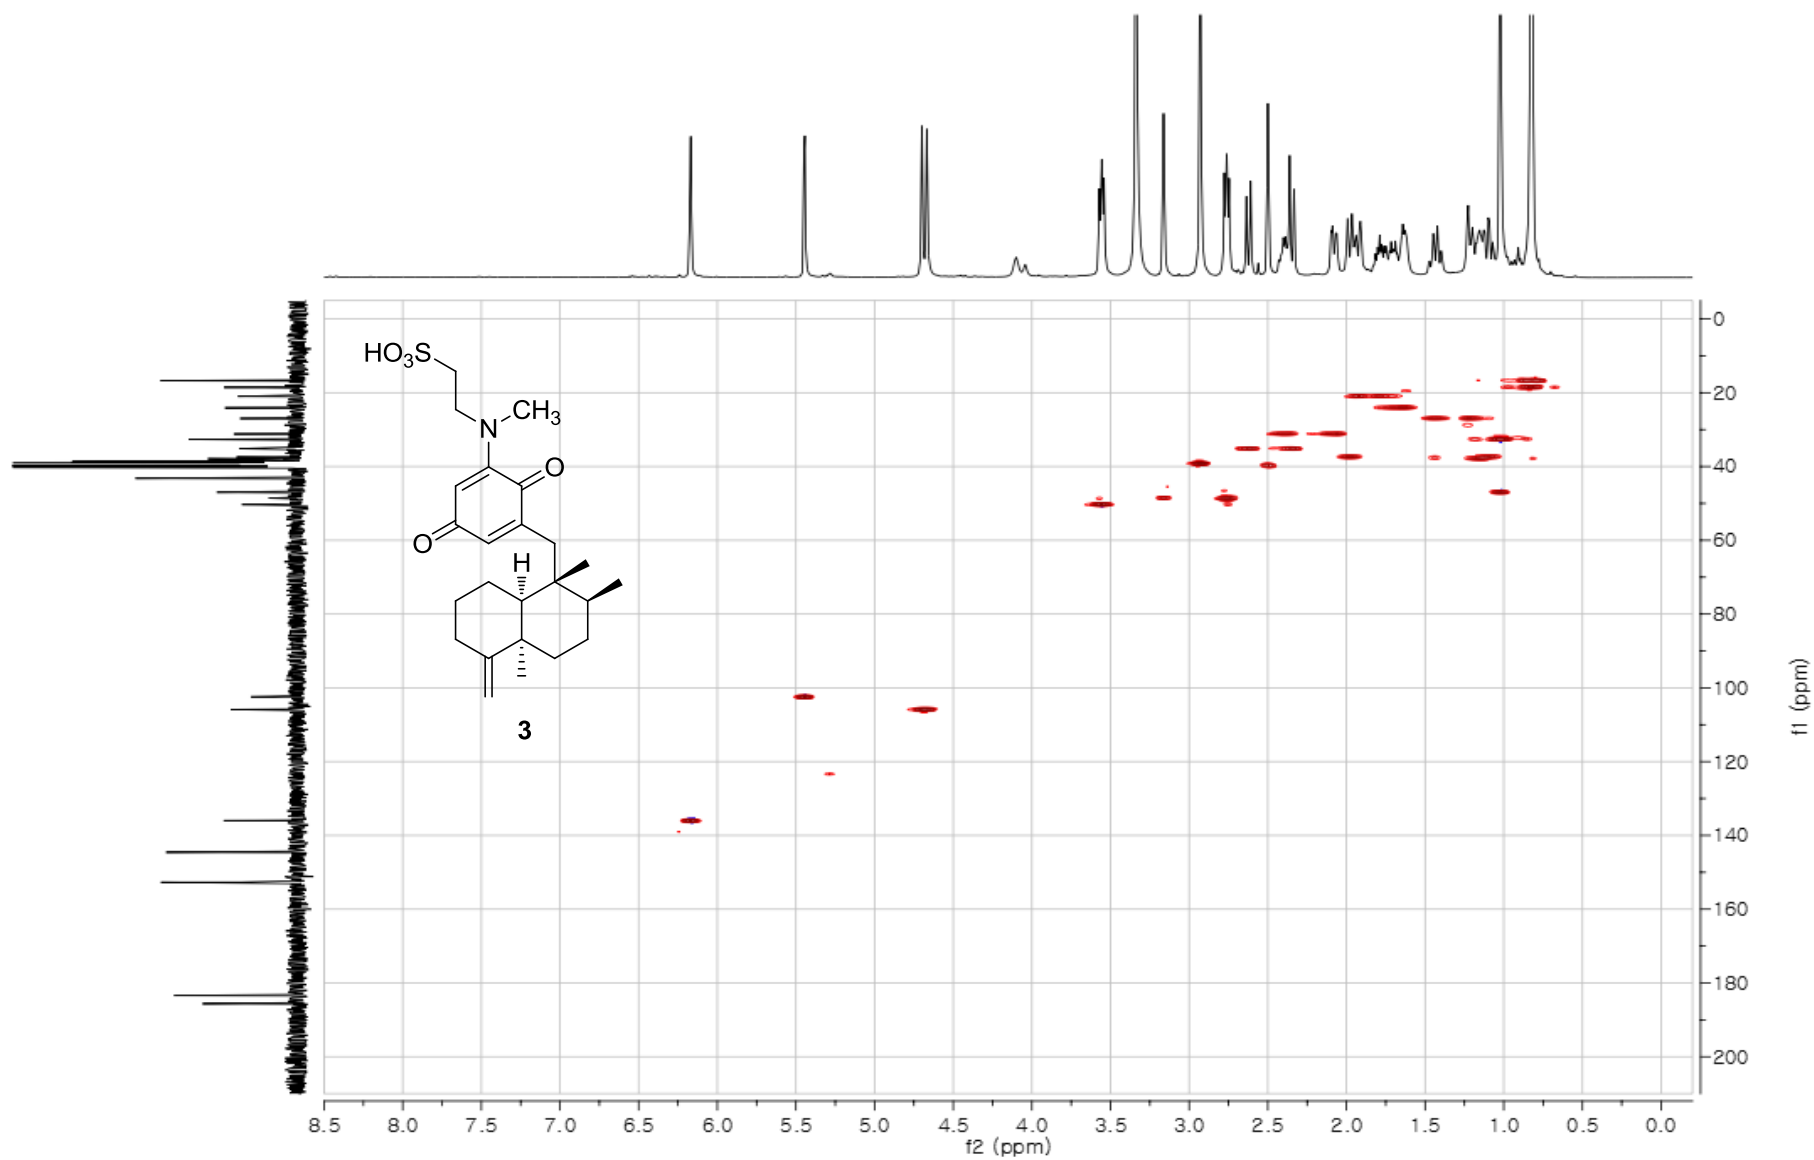

**Figure S16.** The HSQC NMR (400 MHz,  $\text{DMSO-}d_6$ ) spectrum of compound **3**

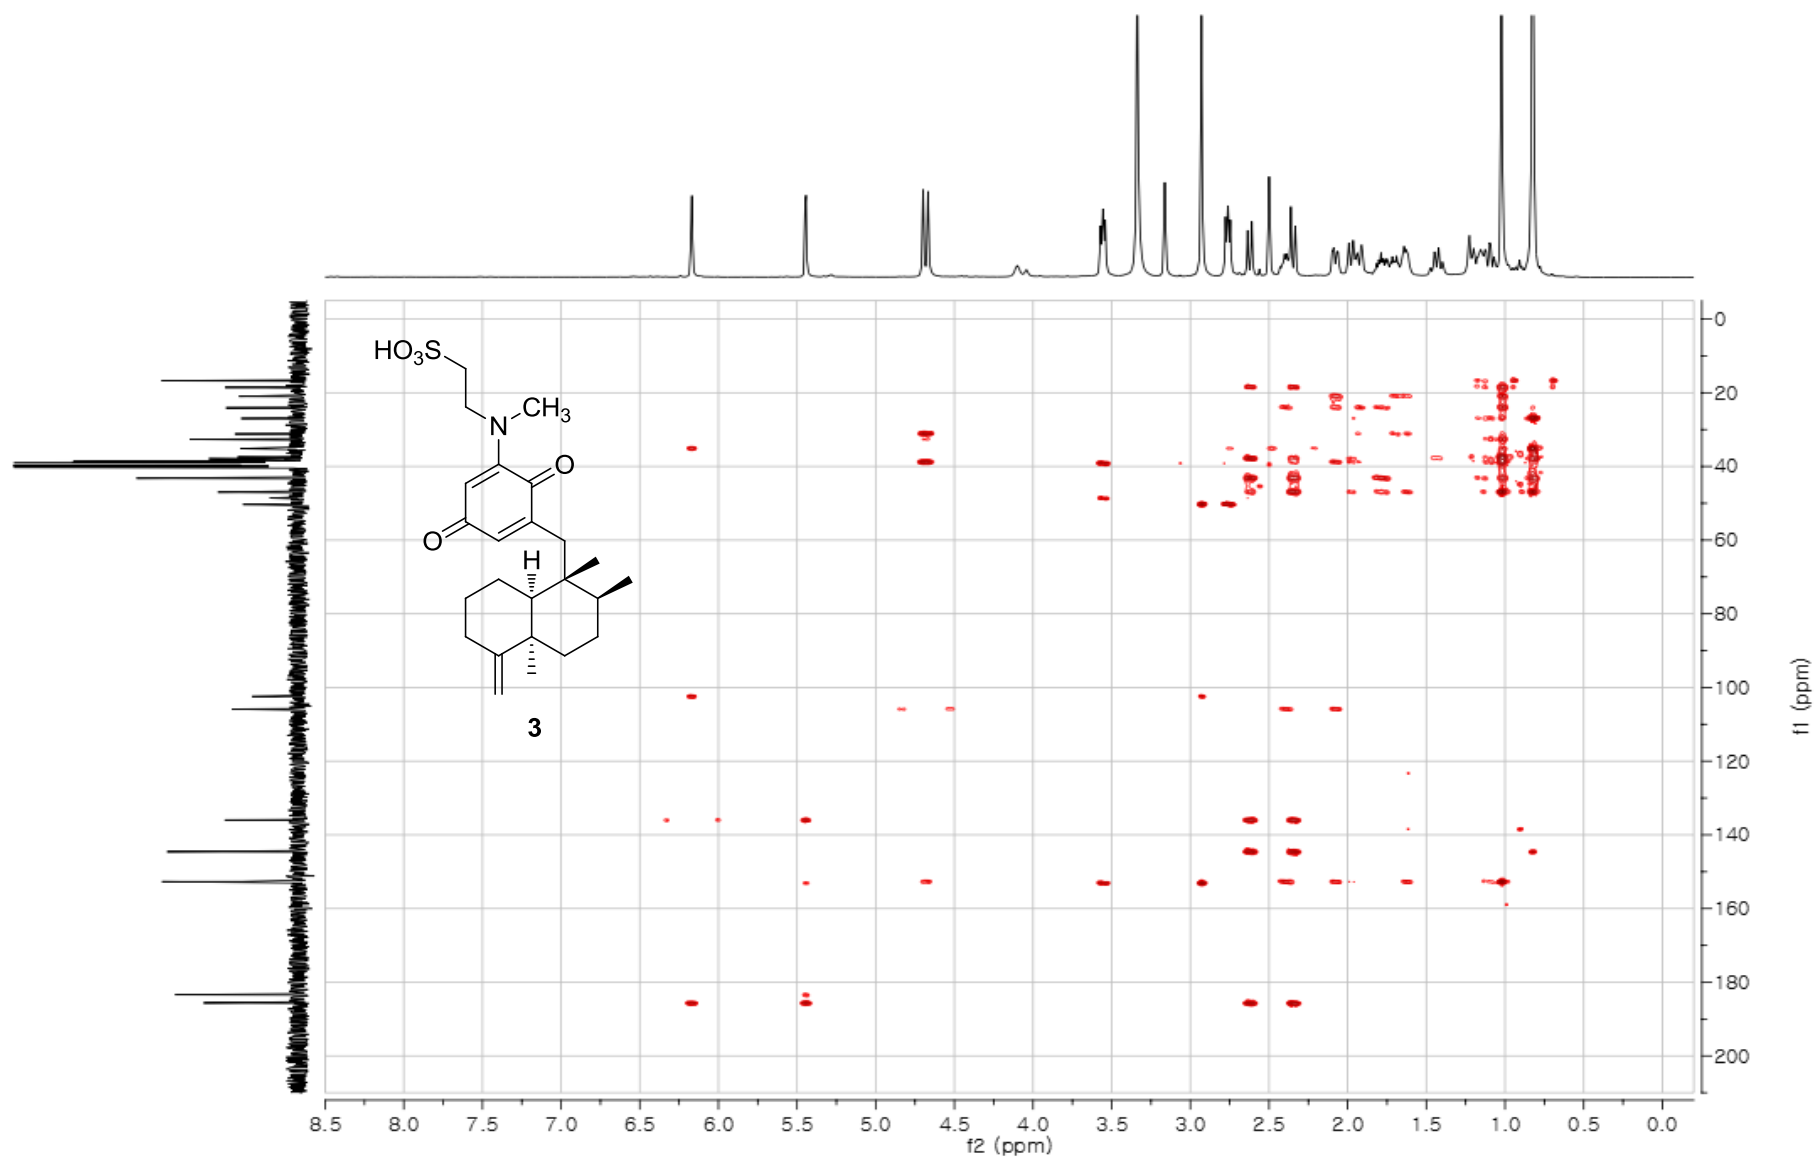

**Figure S17.** The HMBC NMR (400 MHz,  $\text{DMSO-}d_6$ ) spectrum of compound **3**

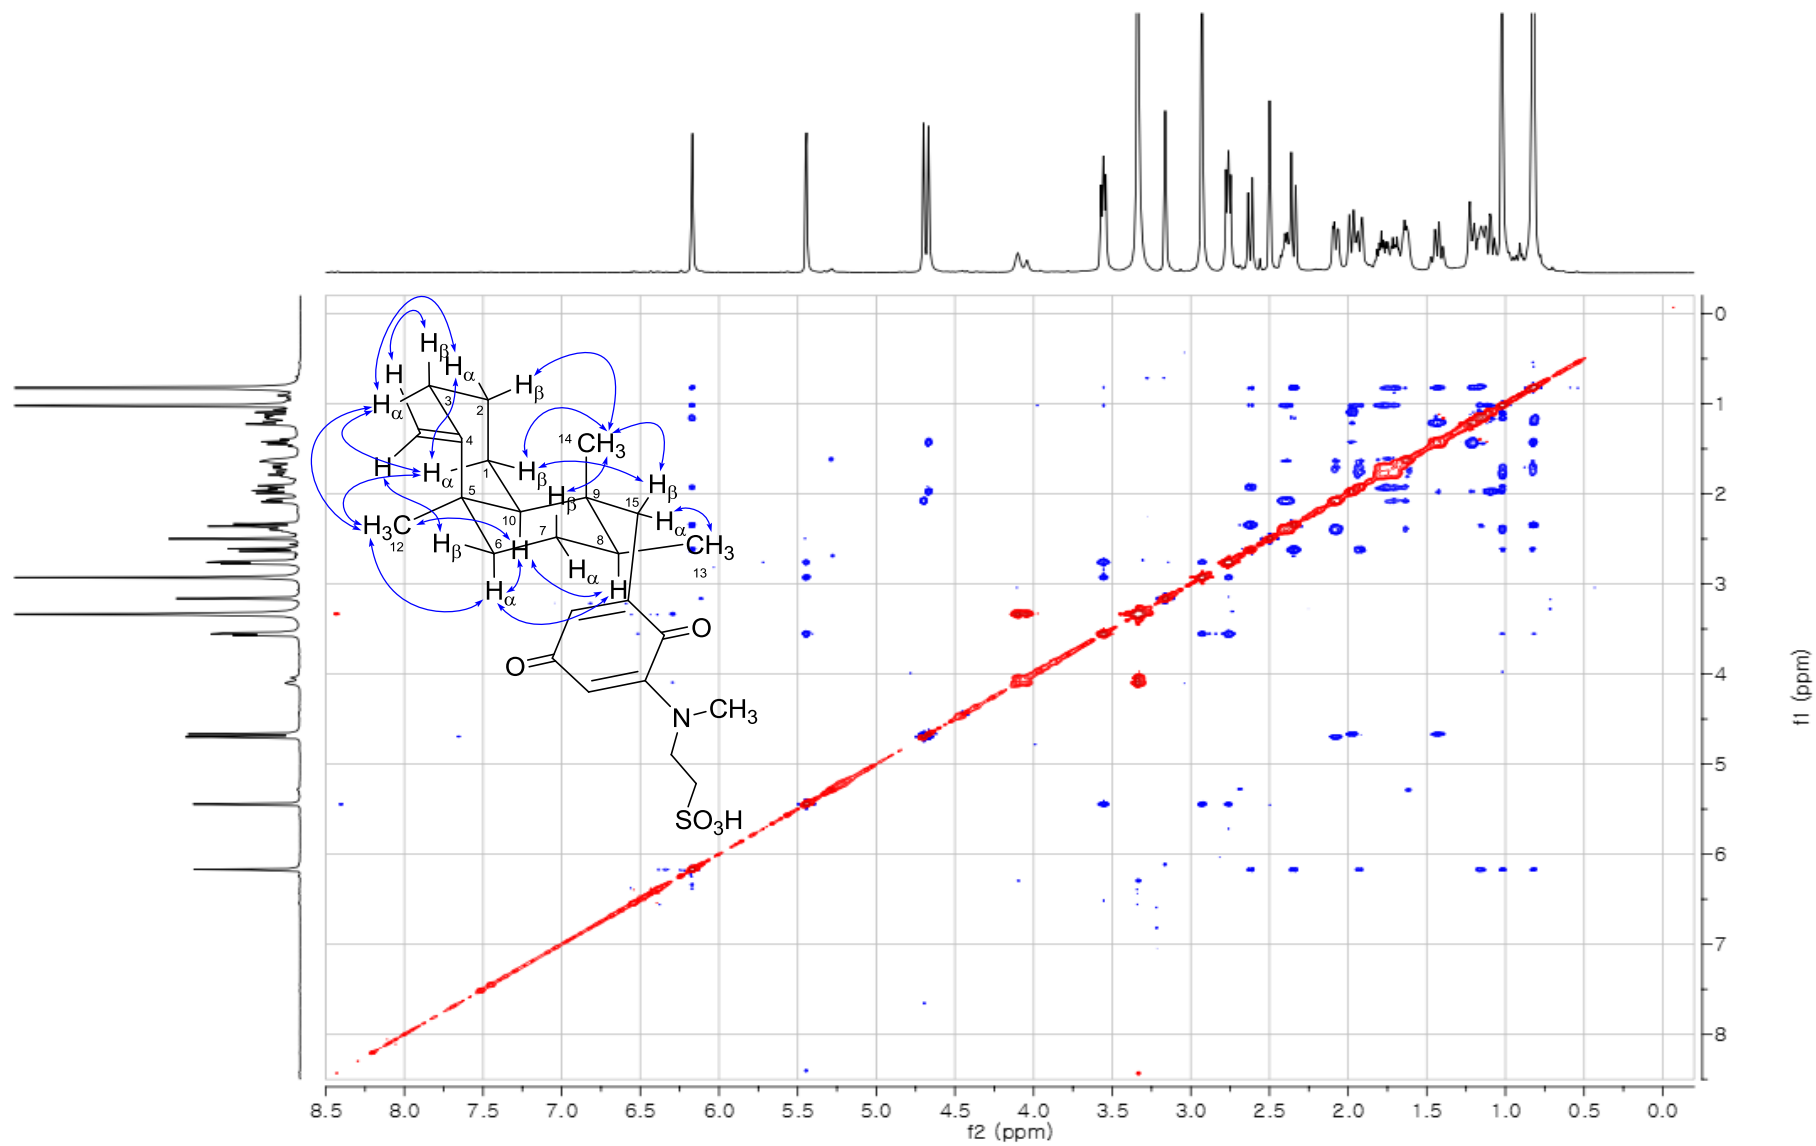

**Figure S18.** The NOESY NMR (400 MHz, DMSO-*d*<sub>6</sub>) spectrum of compound **3**

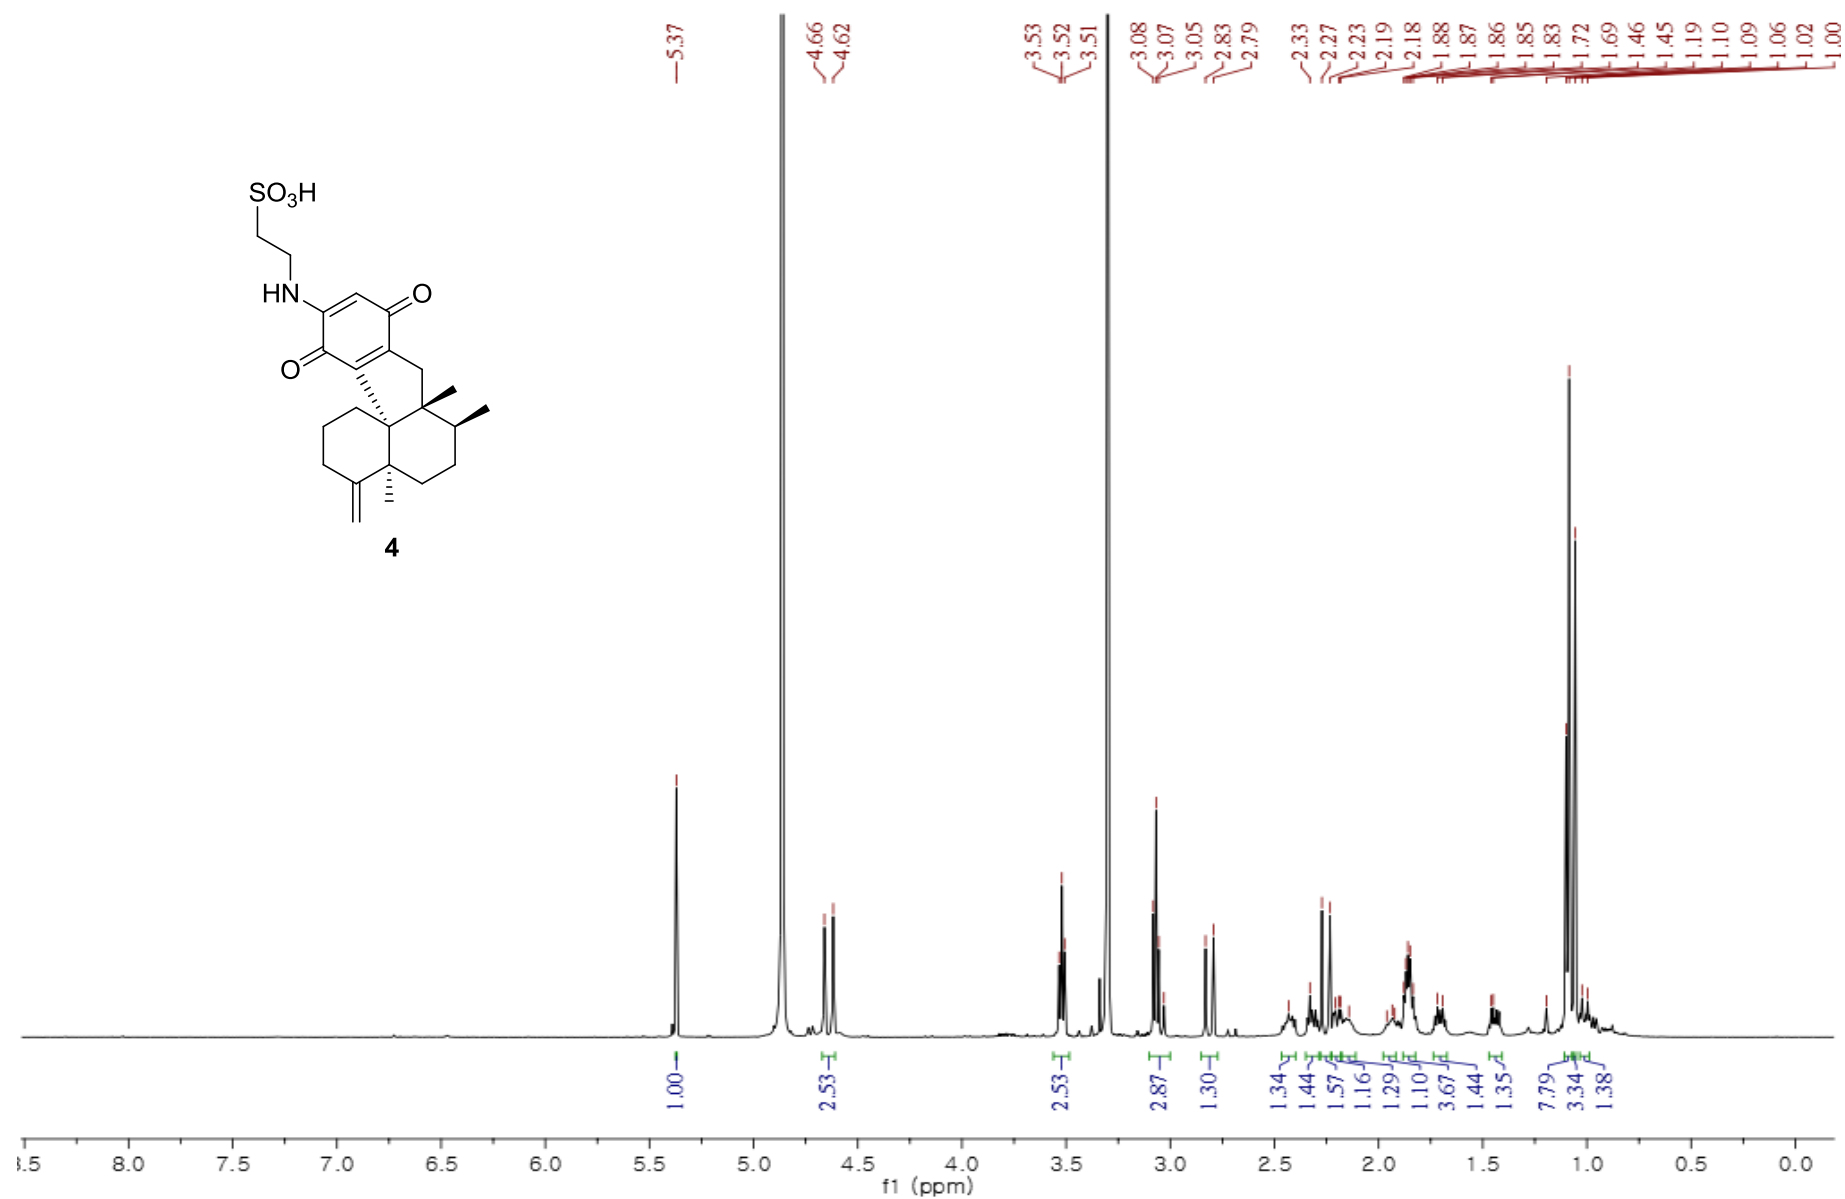

**Figure S19.** The <sup>1</sup>H NMR (500 MHz, CD<sub>3</sub>OD) spectrum of compound **4**

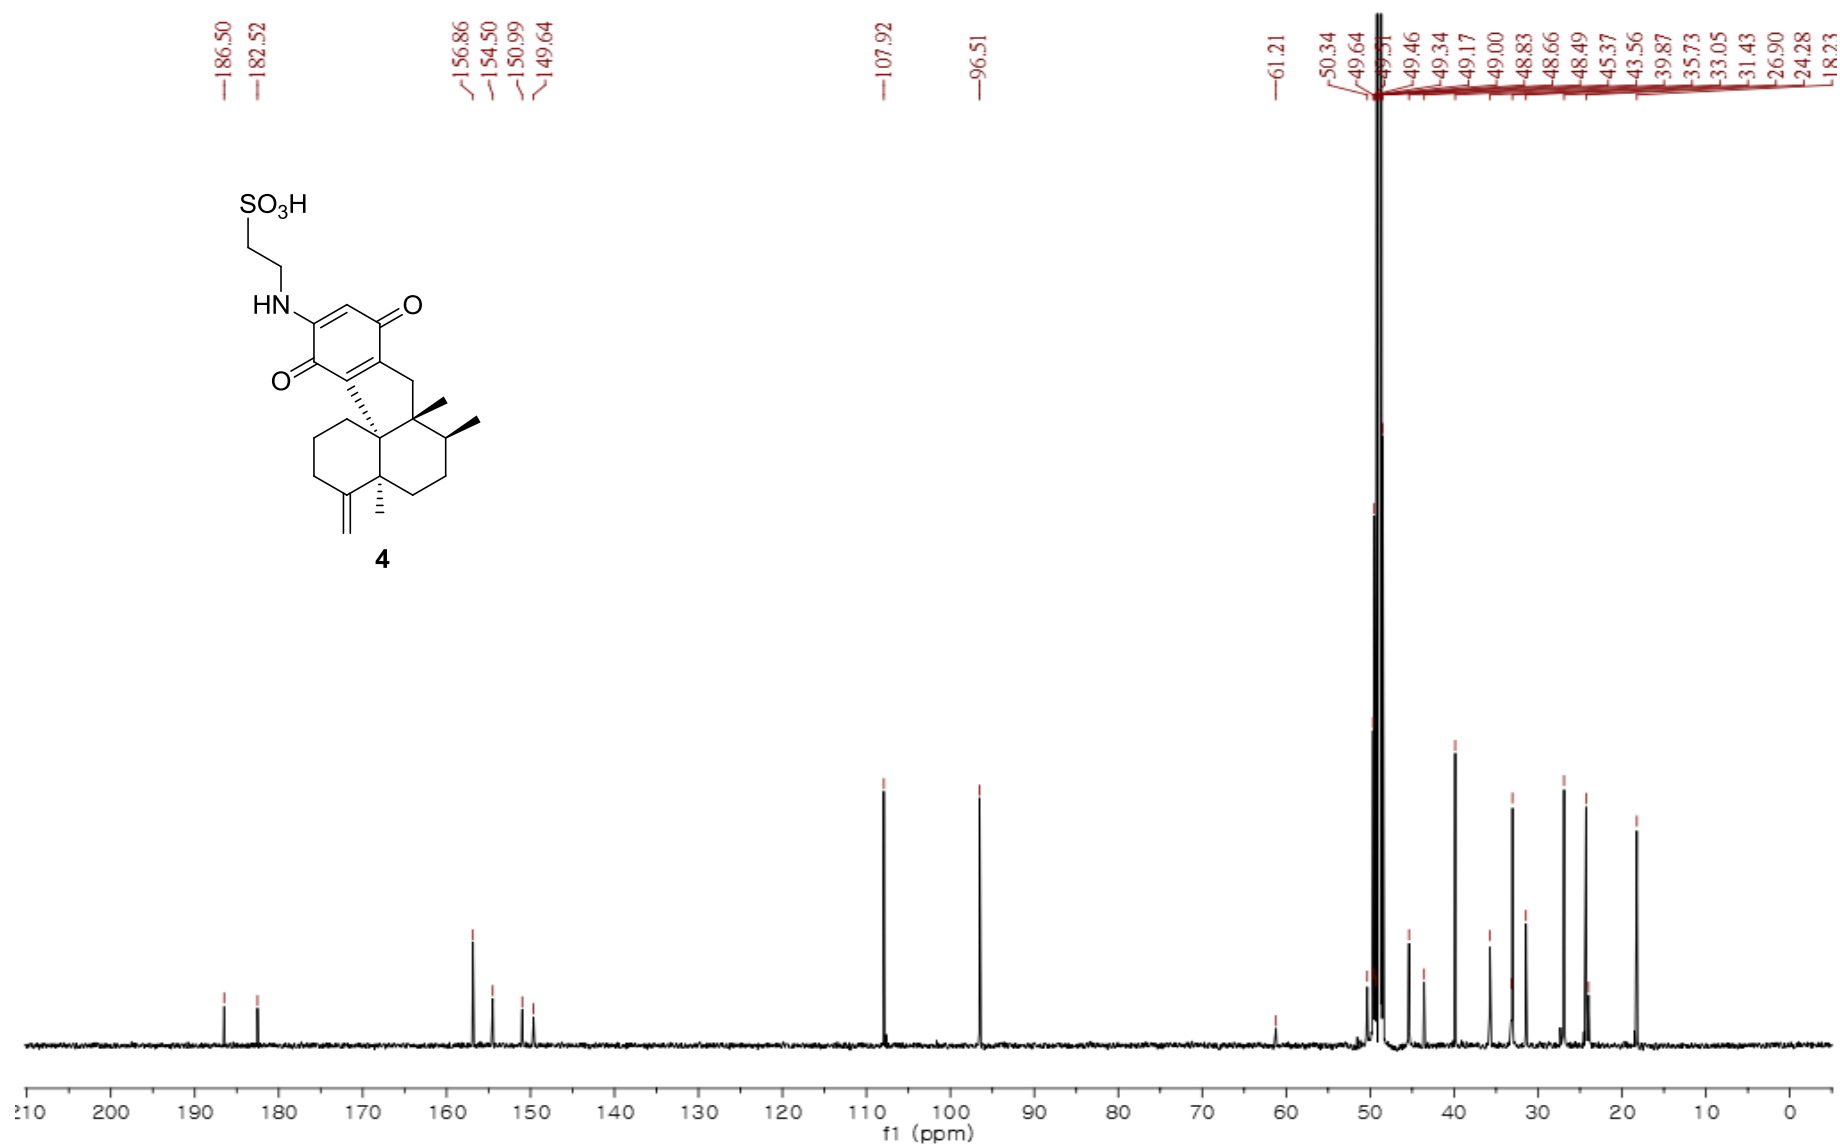

**Figure S20.** The  $^{13}\text{C}$  NMR (125 MHz,  $\text{CD}_3\text{OD}$ ) spectrum of compound **4**

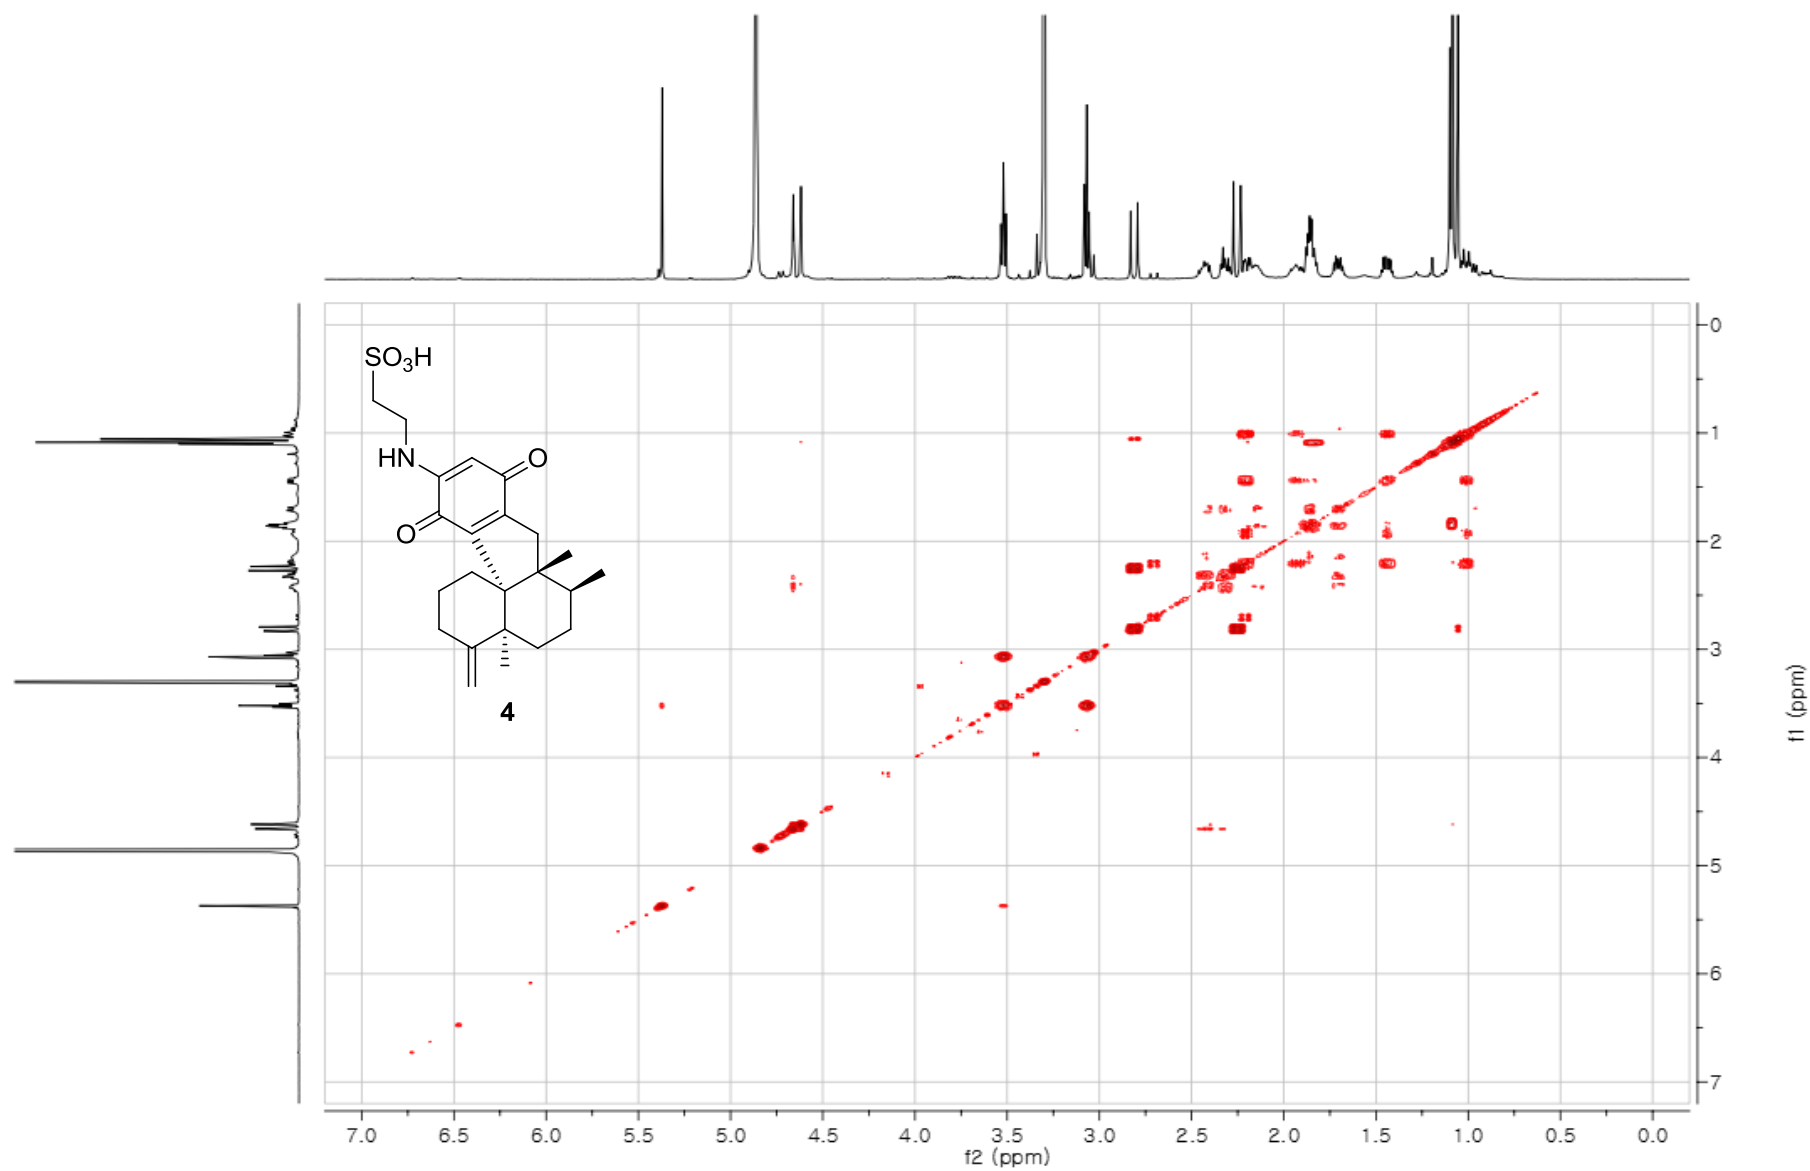

**Figure S21.** The COSY NMR (500 MHz,  $\text{CD}_3\text{OD}$ ) spectrum of compound **4**



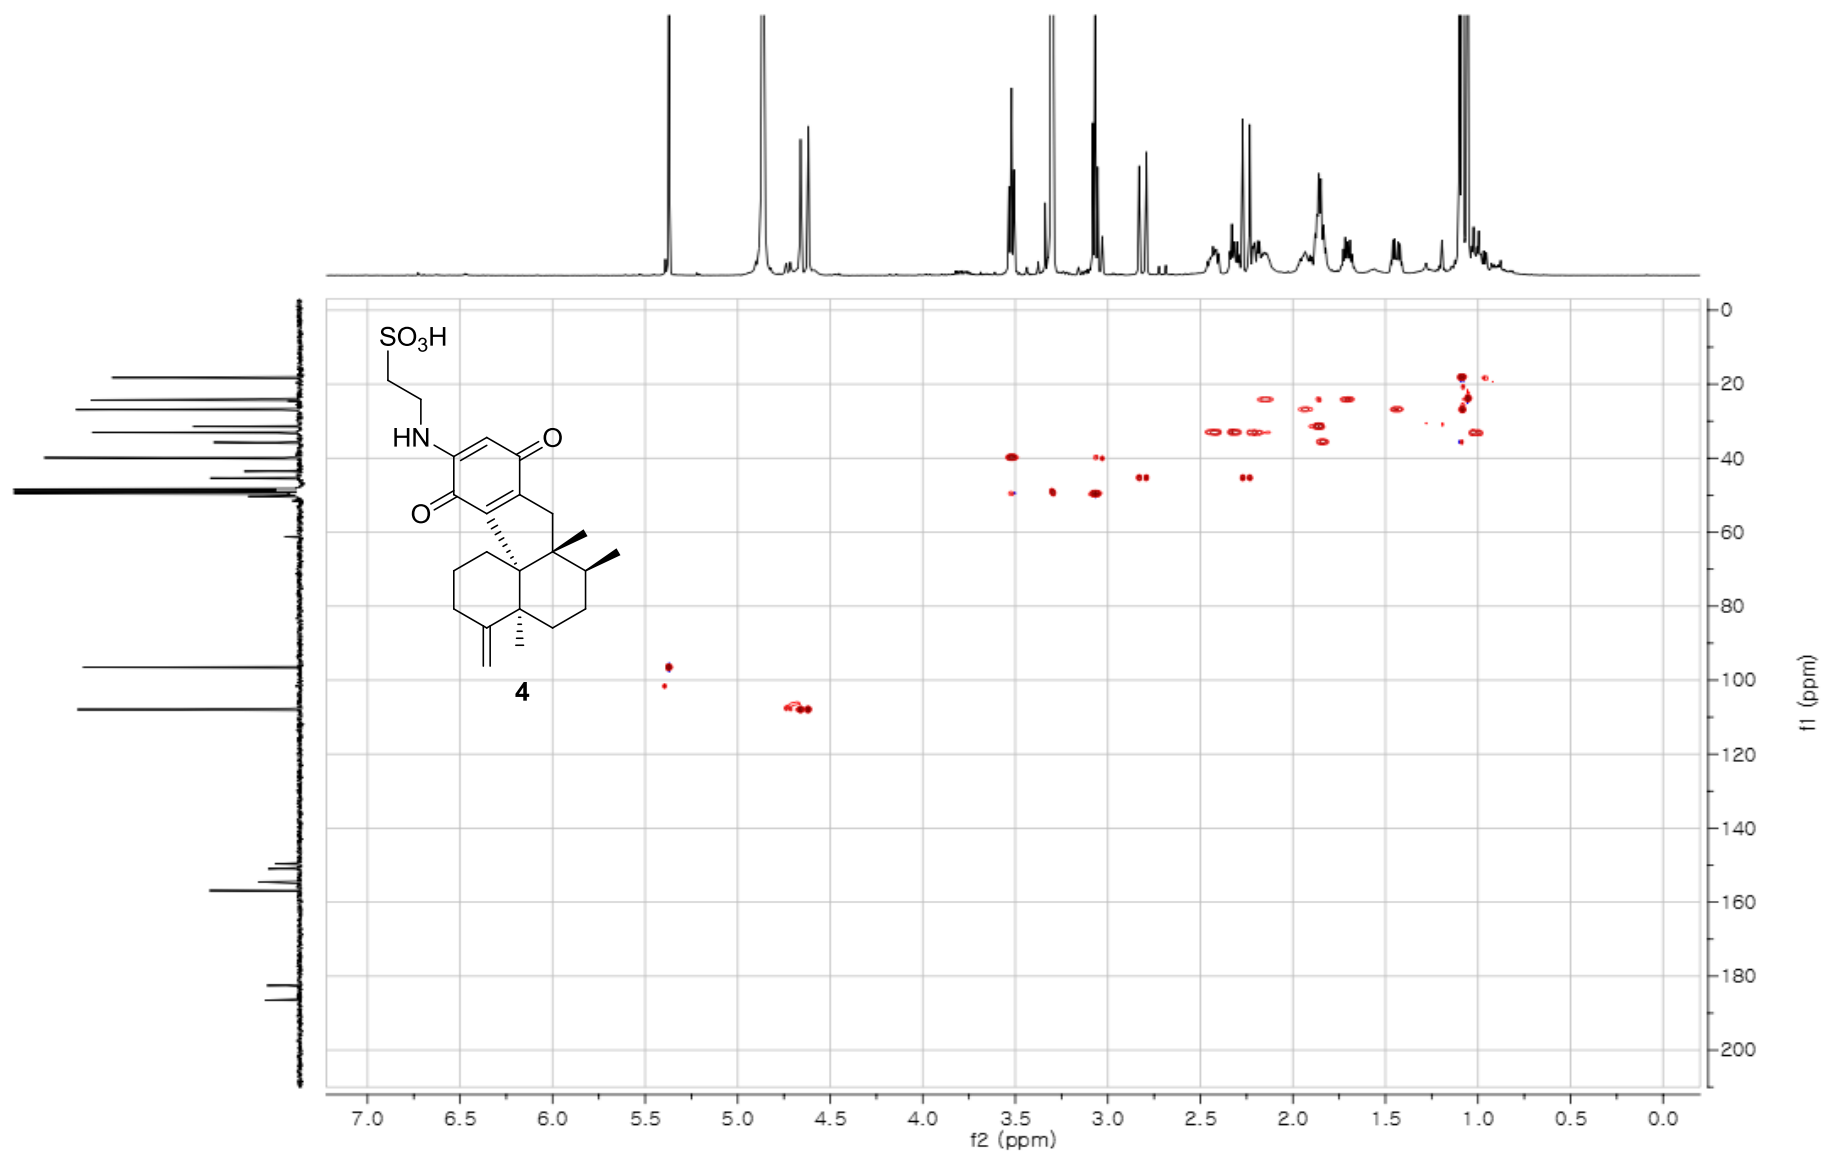

**Figure S22.** The HSQC NMR (500 MHz,  $\text{CD}_3\text{OD}$ ) spectrum of compound **4**

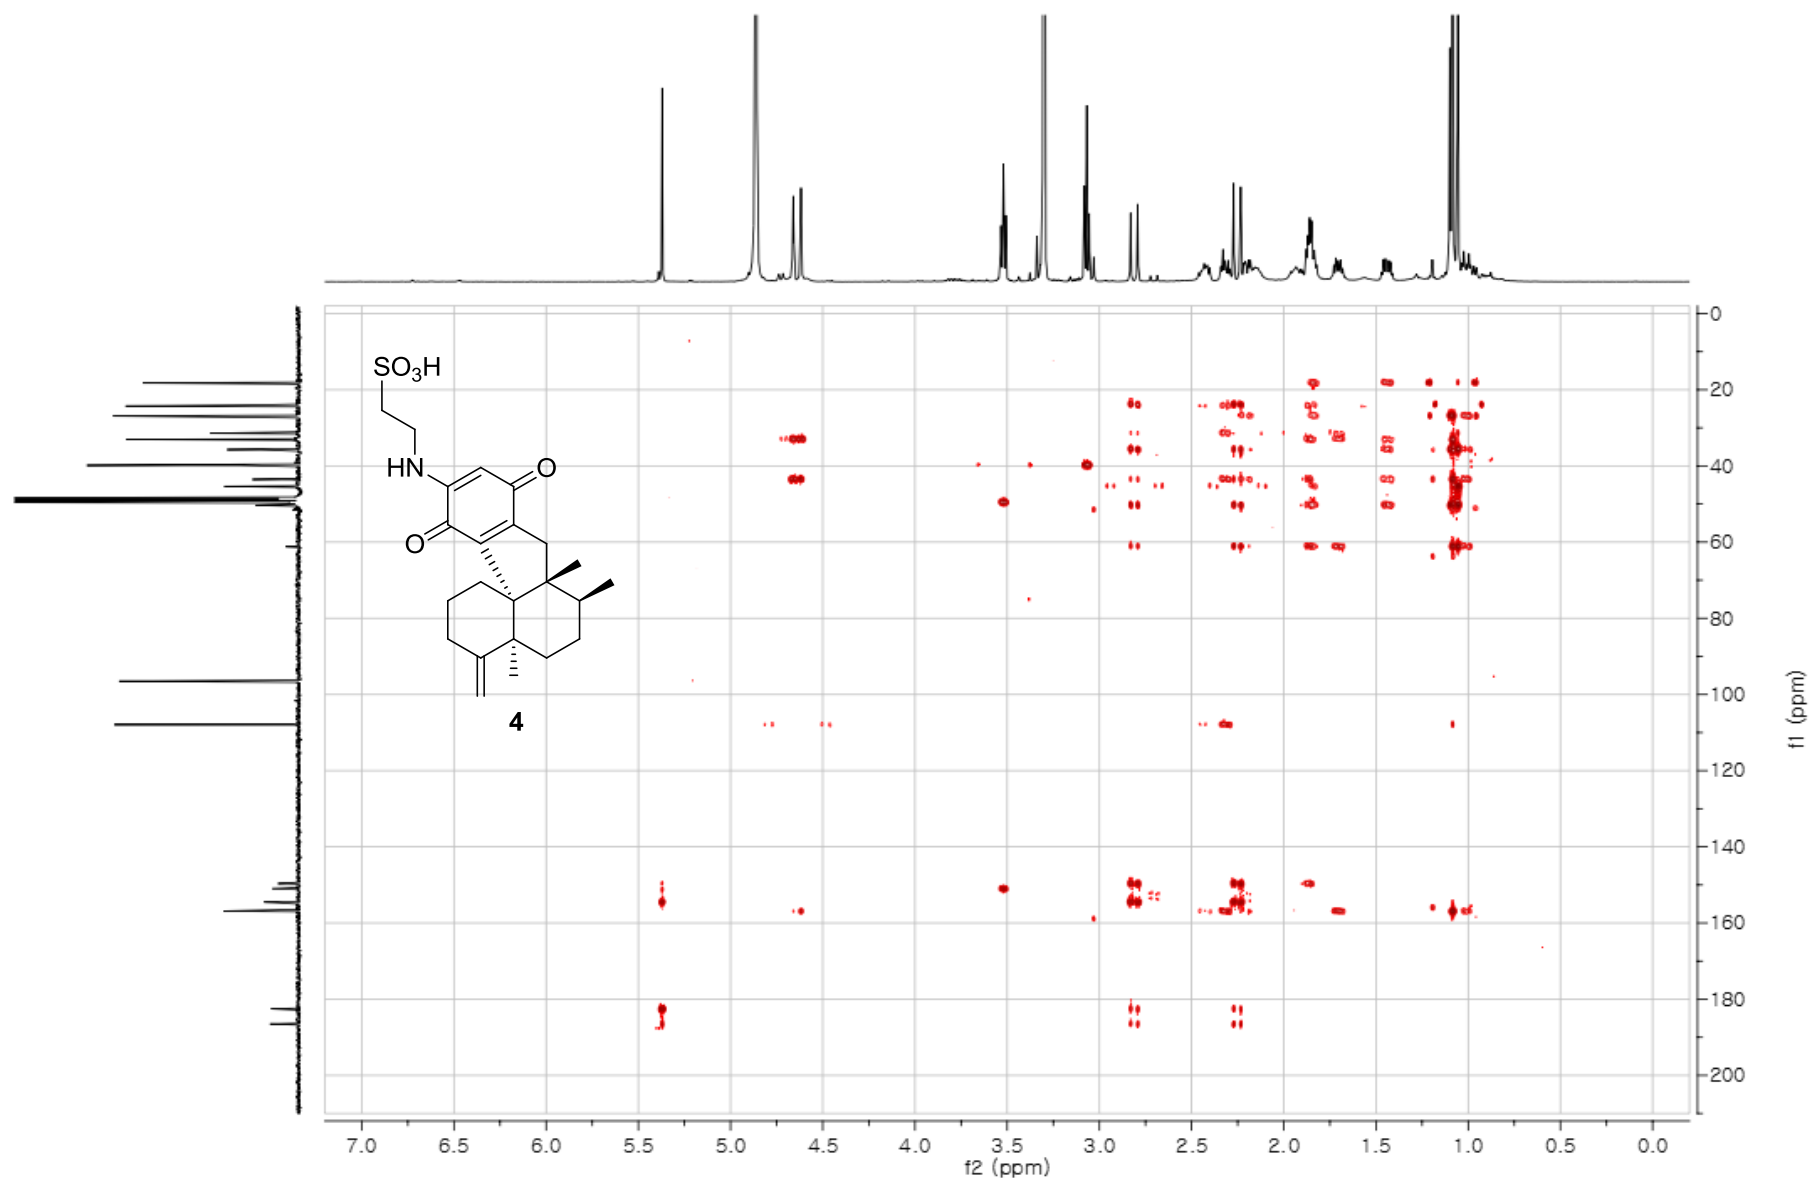

**Figure S23.** The HMBC NMR (500 MHz,  $\text{CD}_3\text{OD}$ ) spectrum of compound **4**

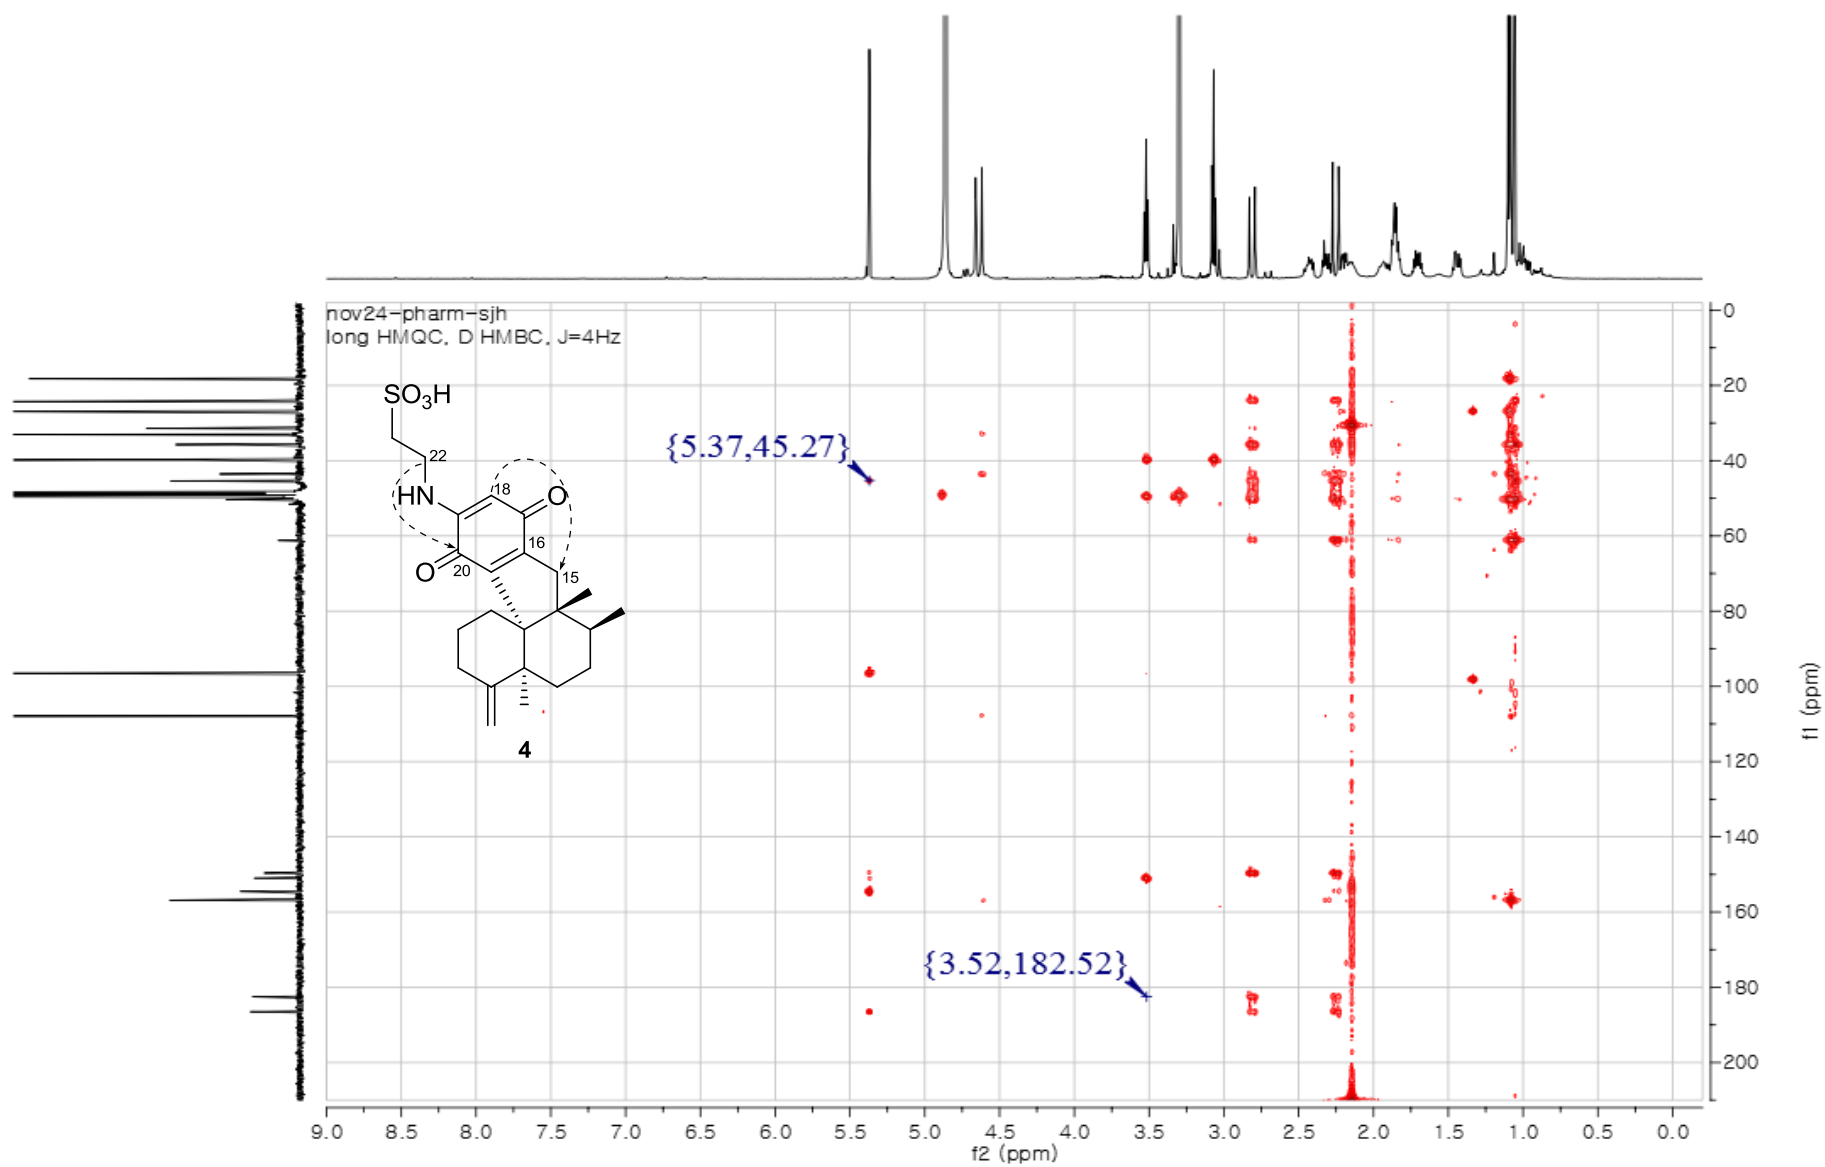

**Figure S24.** The D-HMBC NMR (500 MHz, CD<sub>3</sub>OD,  $J = 4$  Hz) spectrum of compound **4**

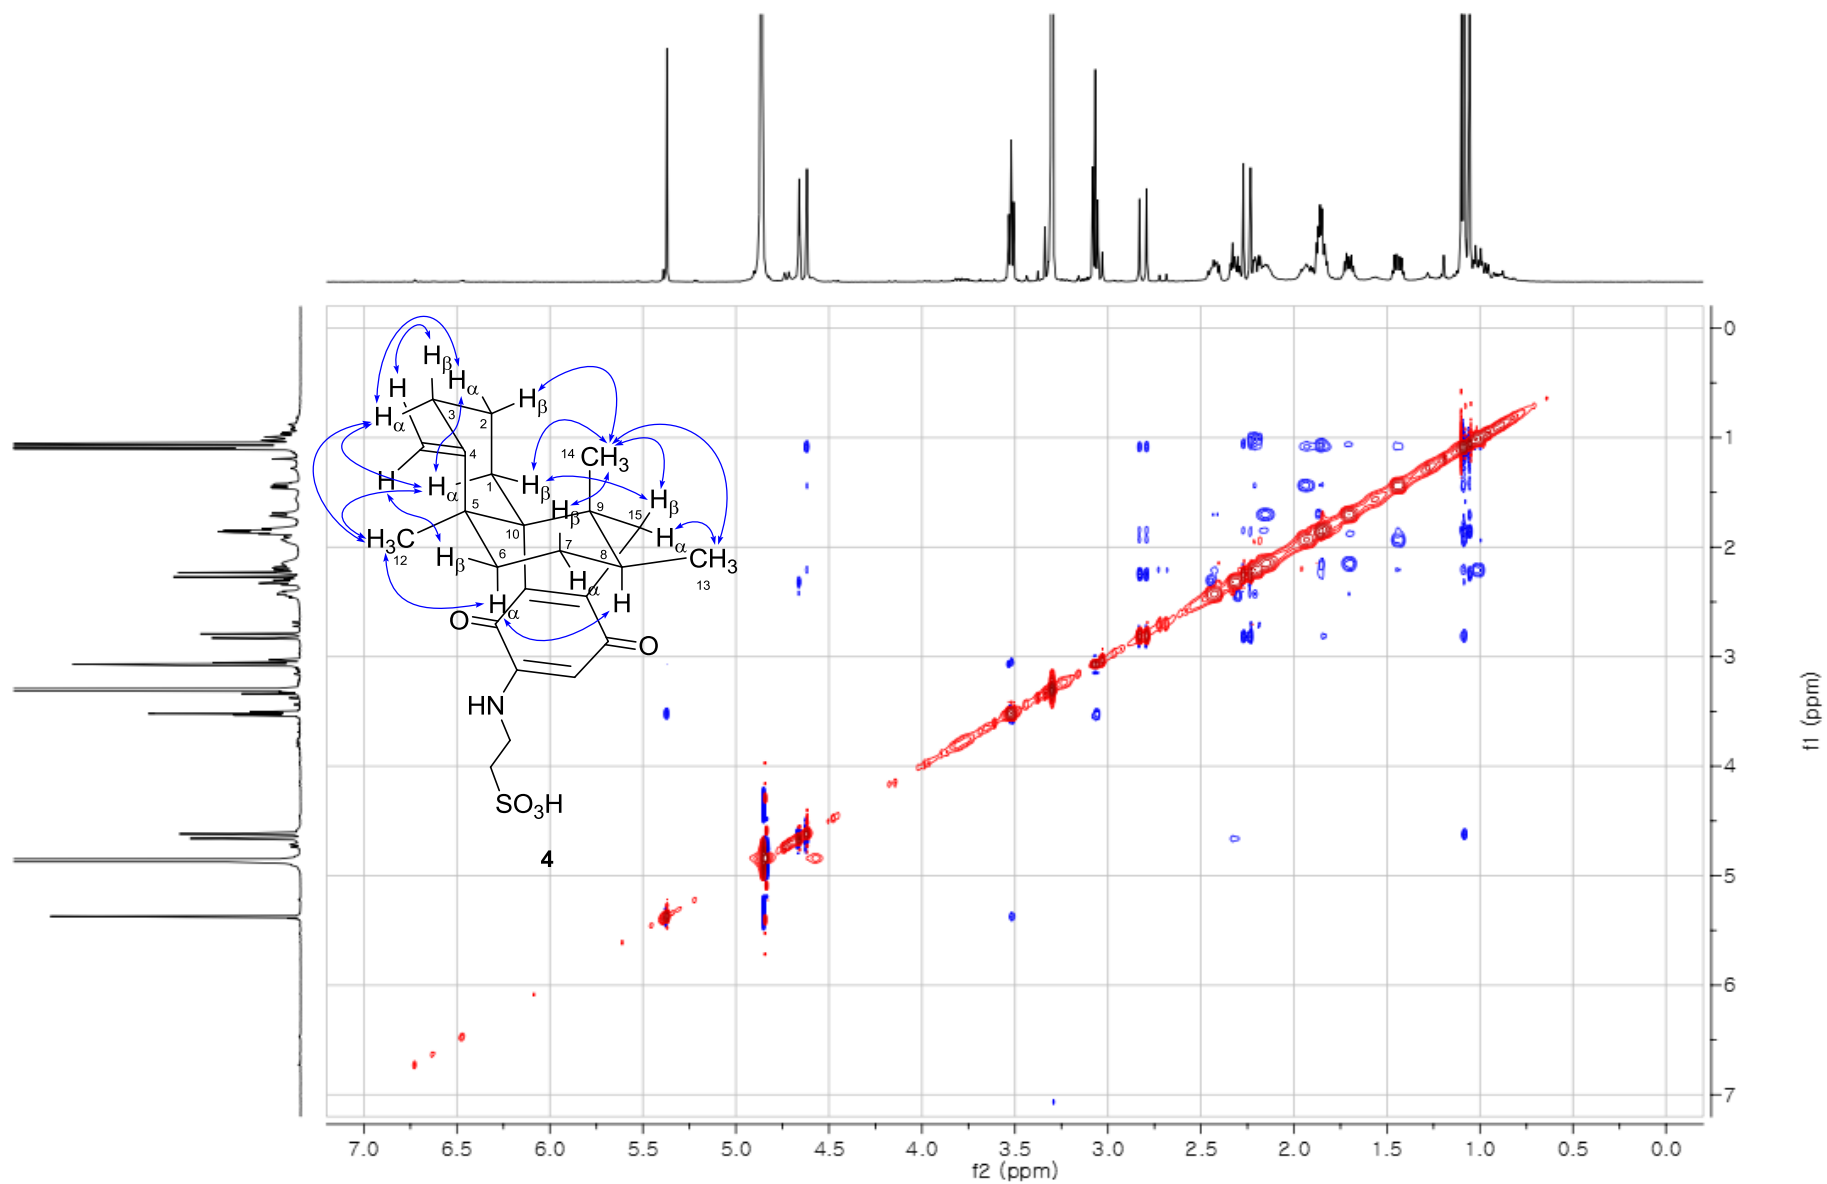

**Figure S25.** The NOESY NMR (500 MHz, CD<sub>3</sub>OD) spectrum of compound **4**

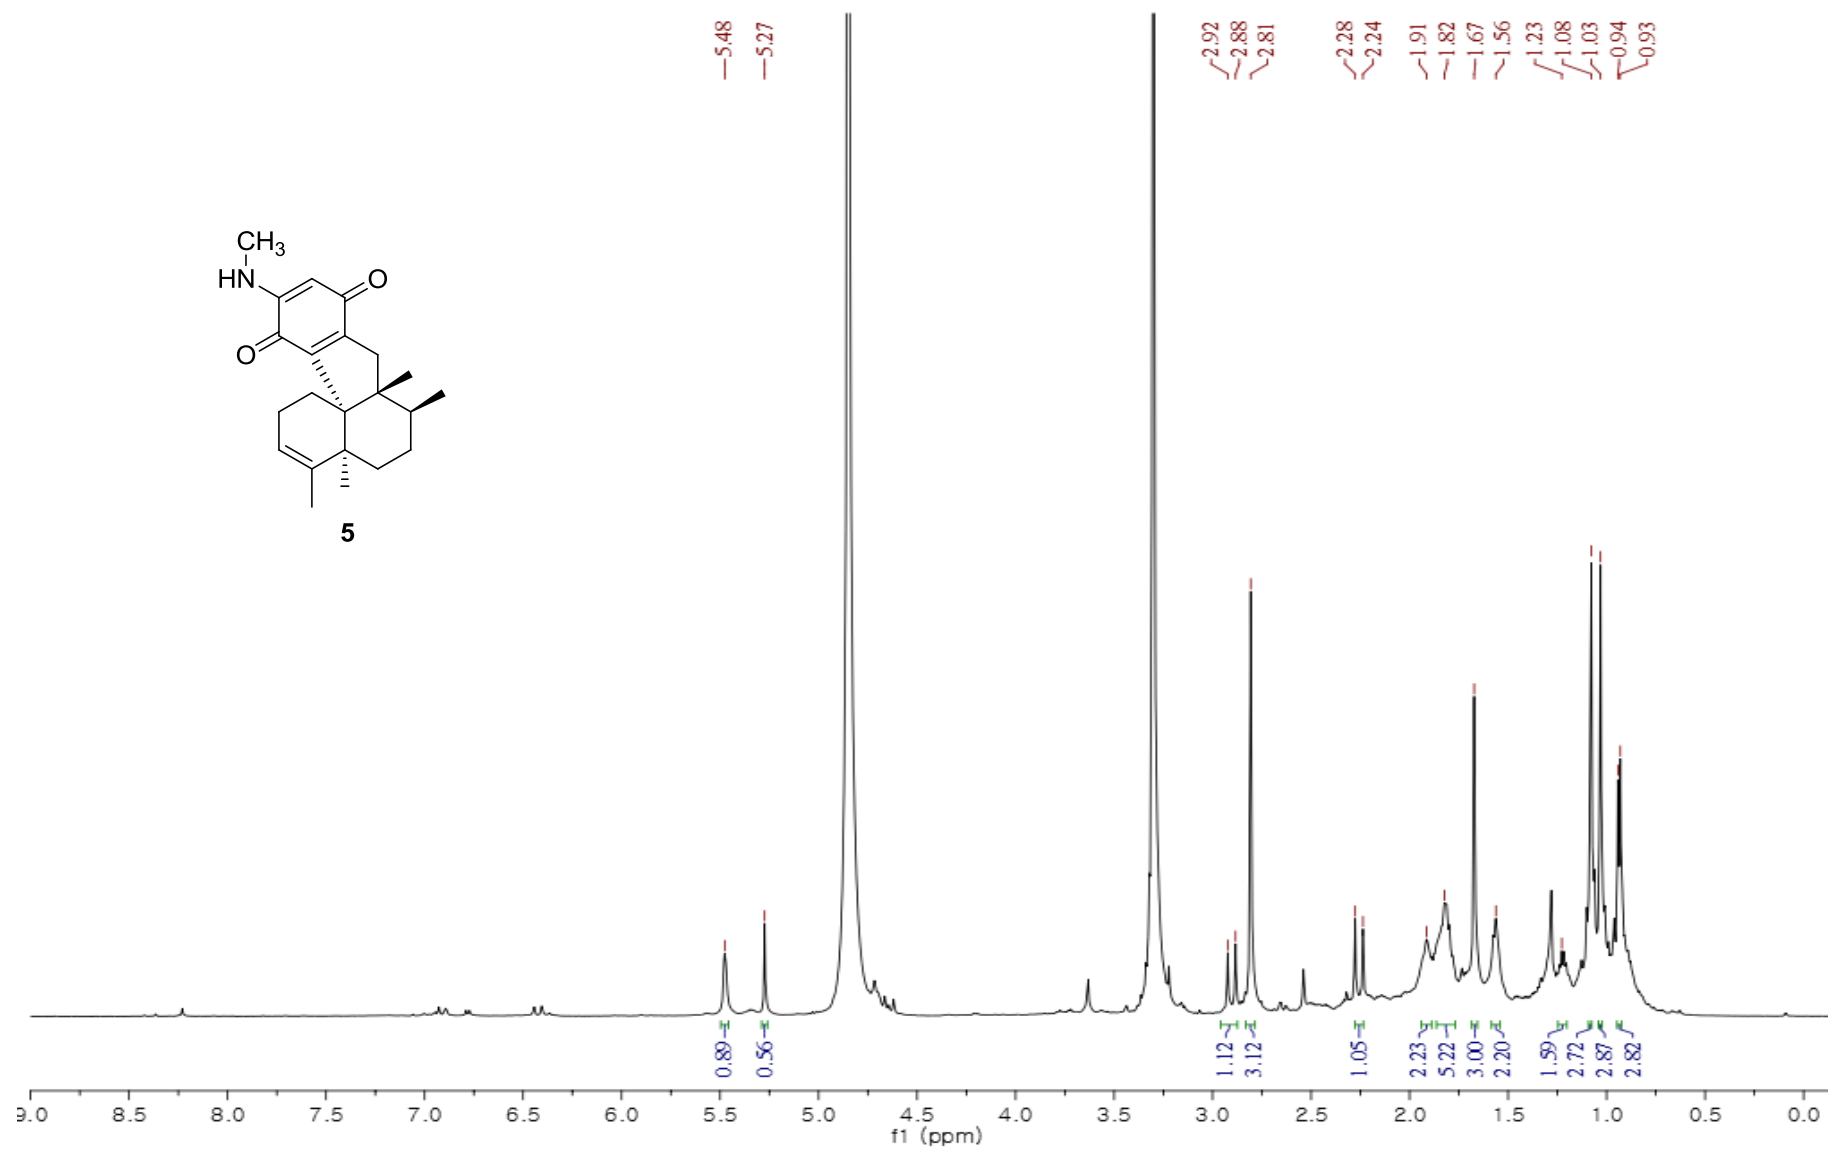

**Figure S26.** The  $^1\text{H}$  NMR (600 MHz,  $\text{CD}_3\text{OD}$ ) spectrum of compound **5**

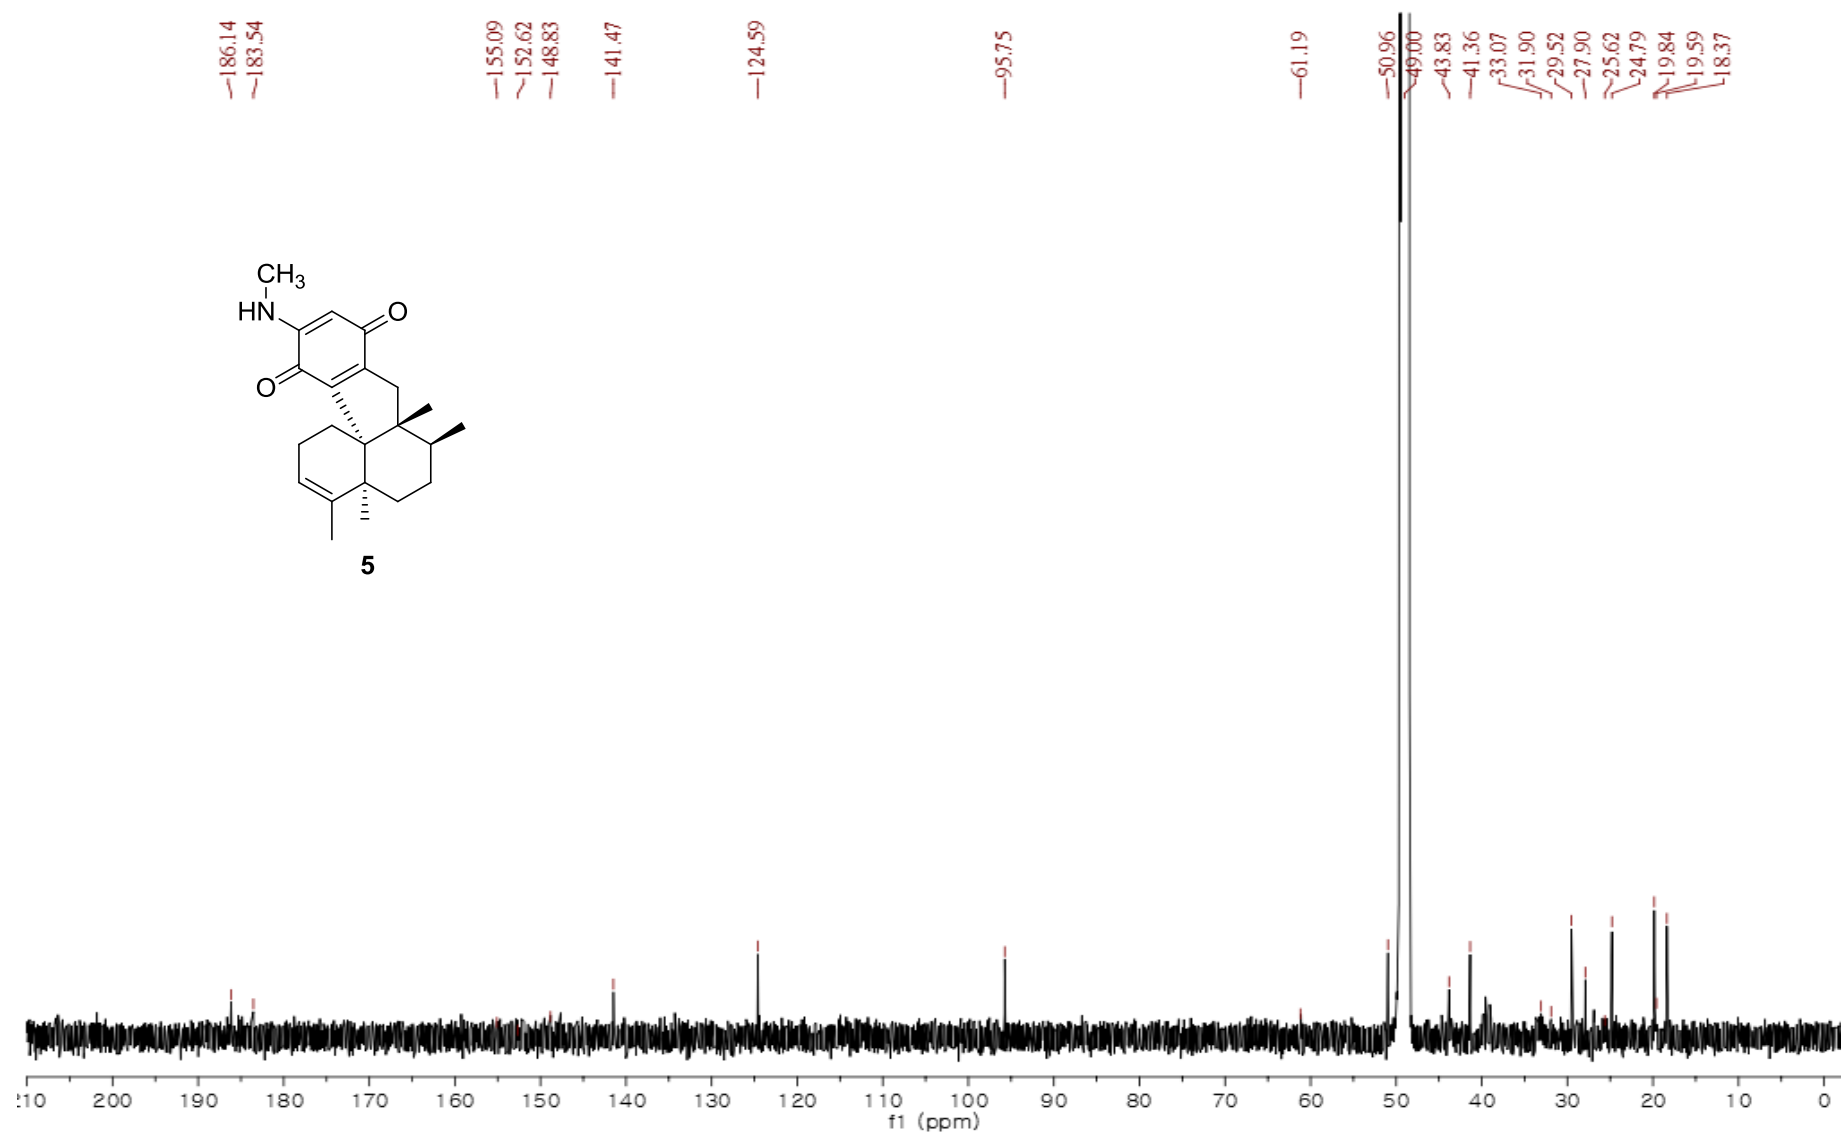

**Figure S27.** The  $^{13}\text{C}$  NMR (150 MHz,  $\text{CD}_3\text{OD}$ ) spectrum of compound **5**

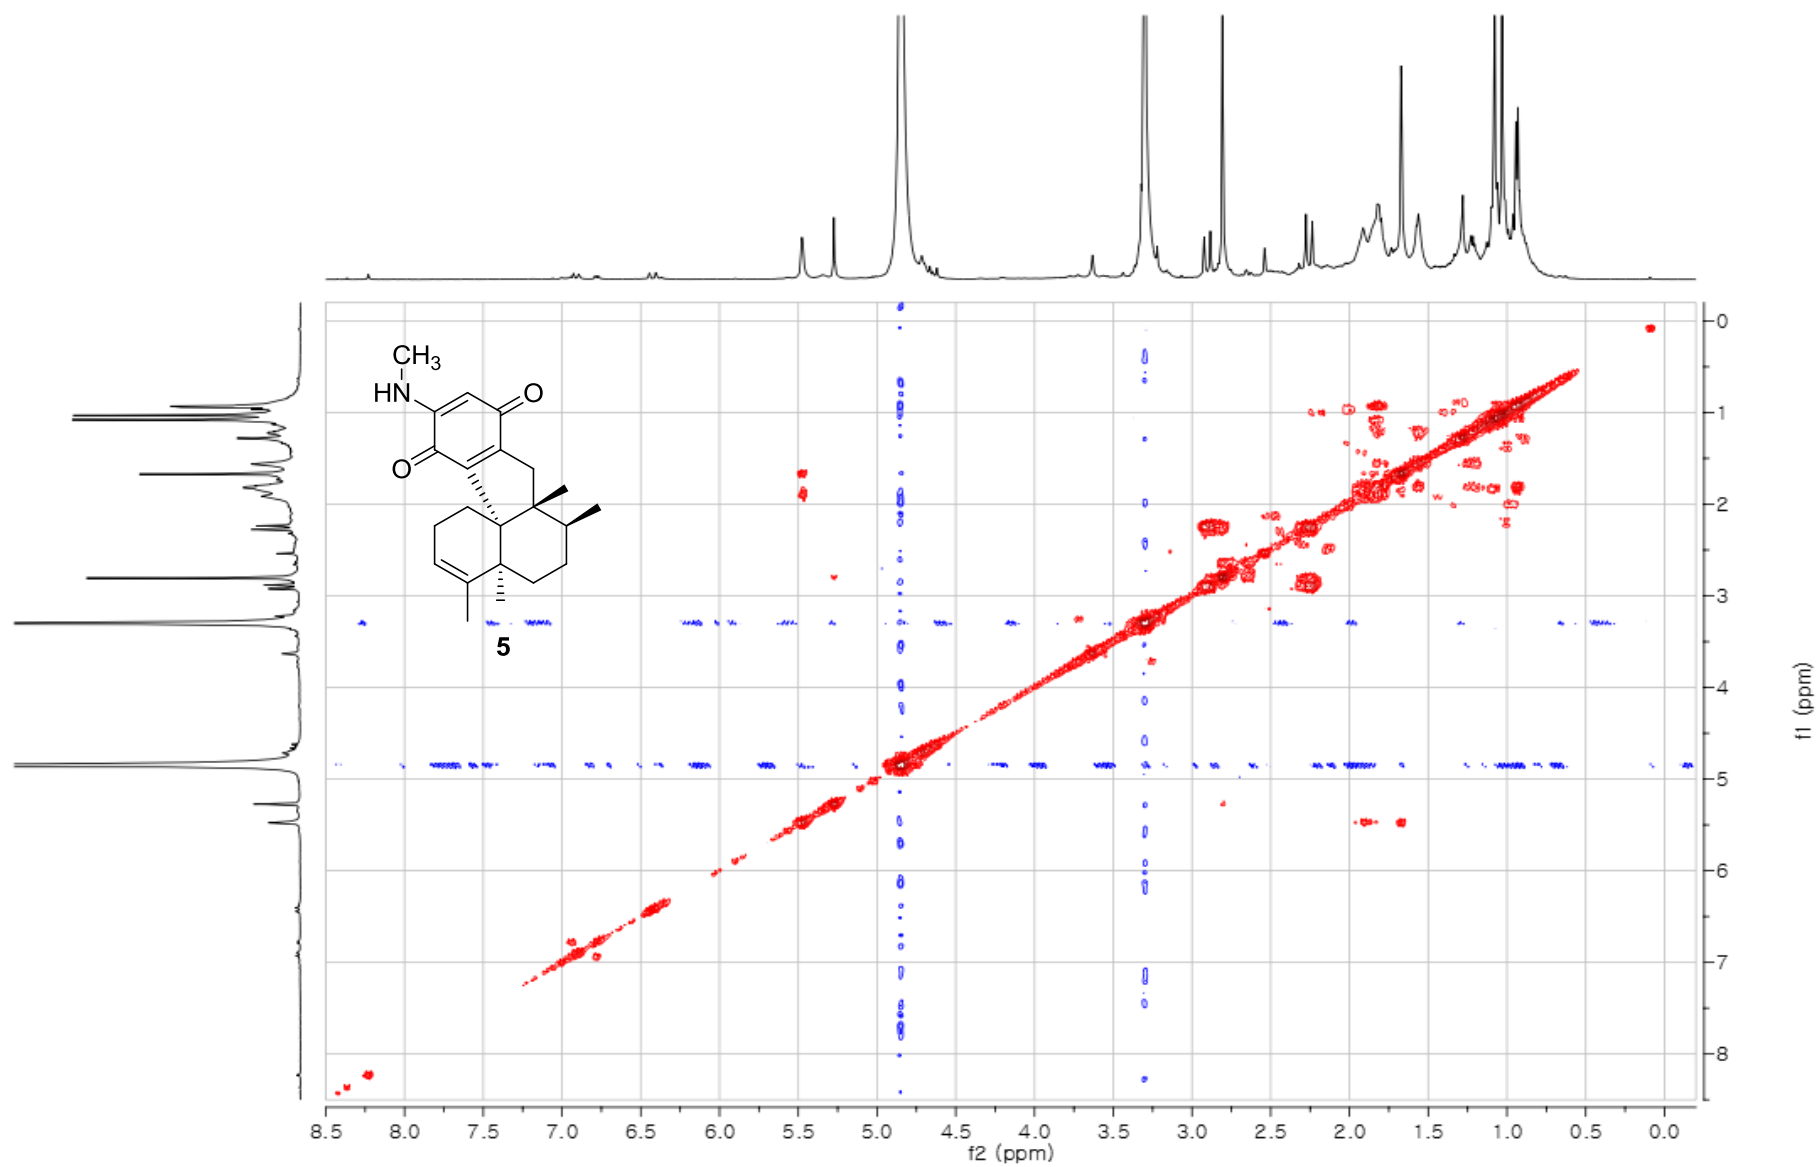

**Figure S28.** The COSY NMR (600 MHz,  $\text{CD}_3\text{OD}$ ) spectrum of compound **5**

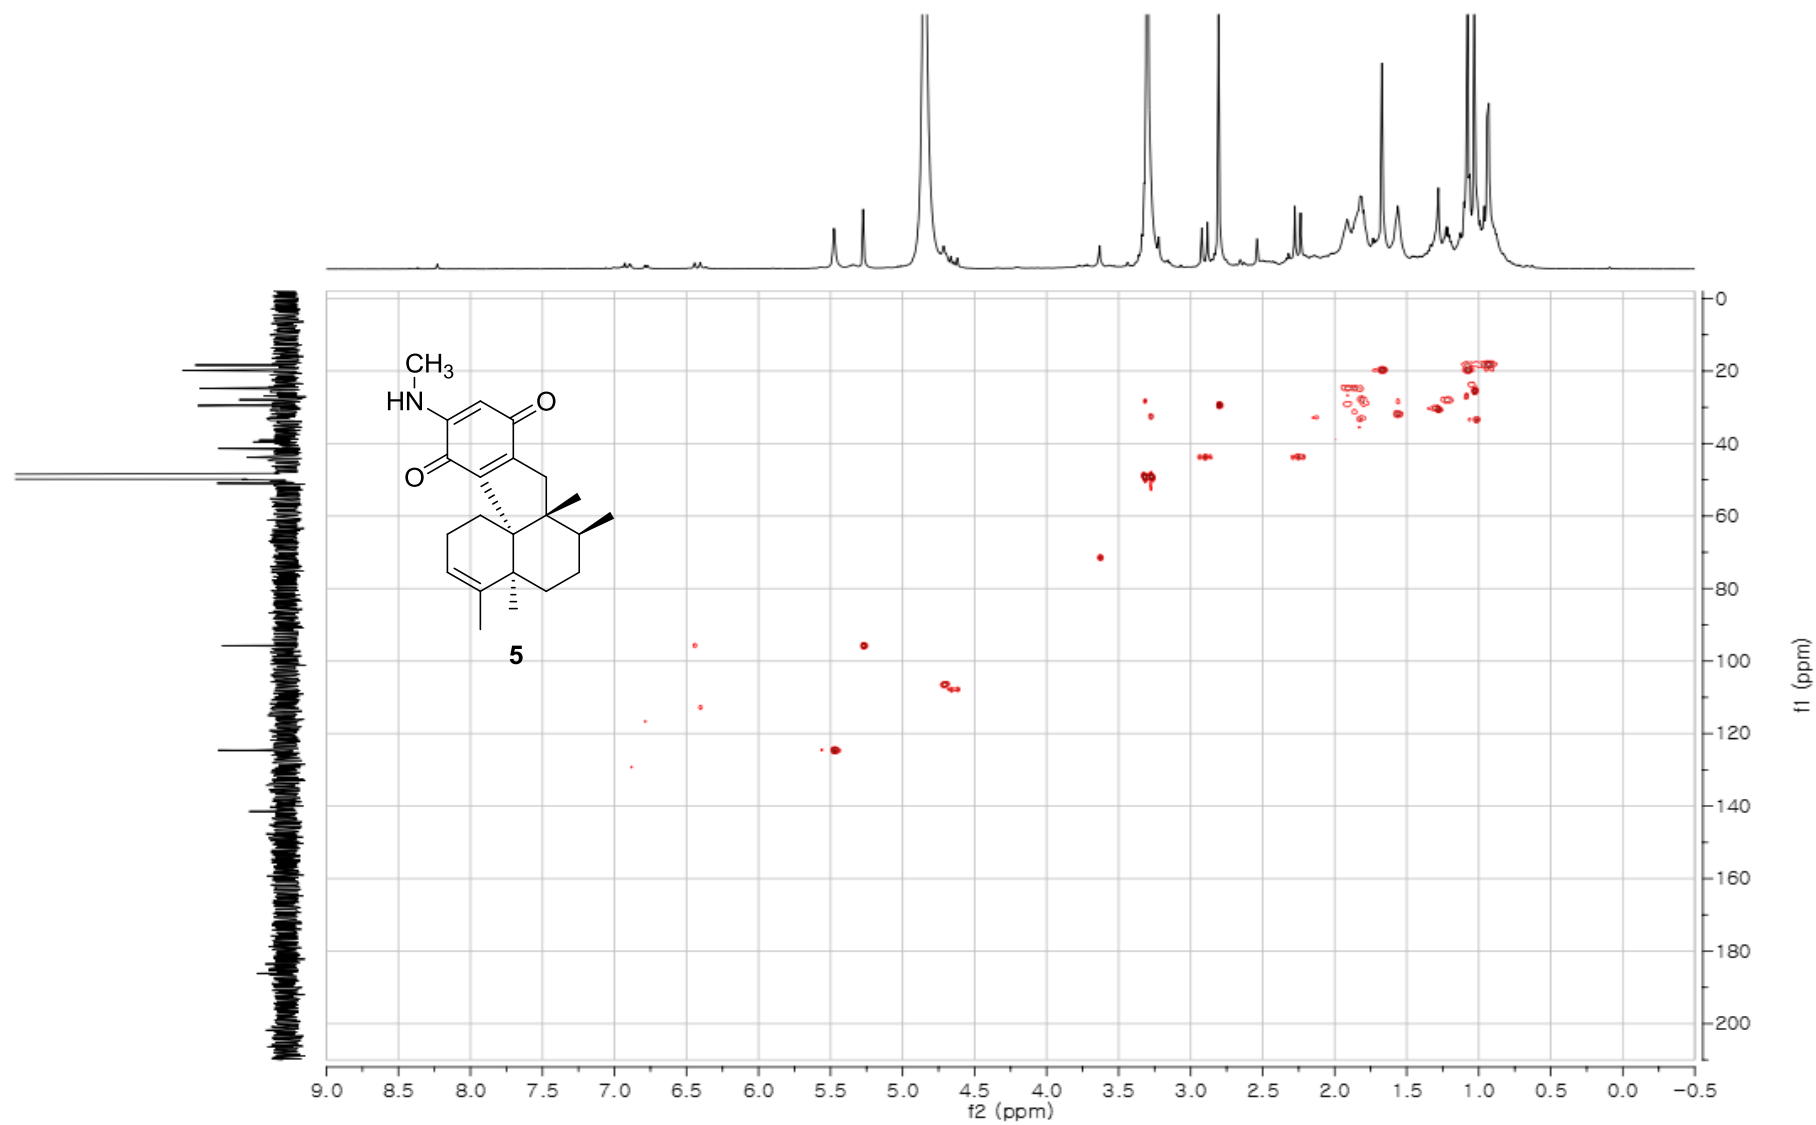

**Figure S29.** The HSQC NMR (600 MHz,  $\text{CD}_3\text{OD}$ ) spectrum of compound **5**



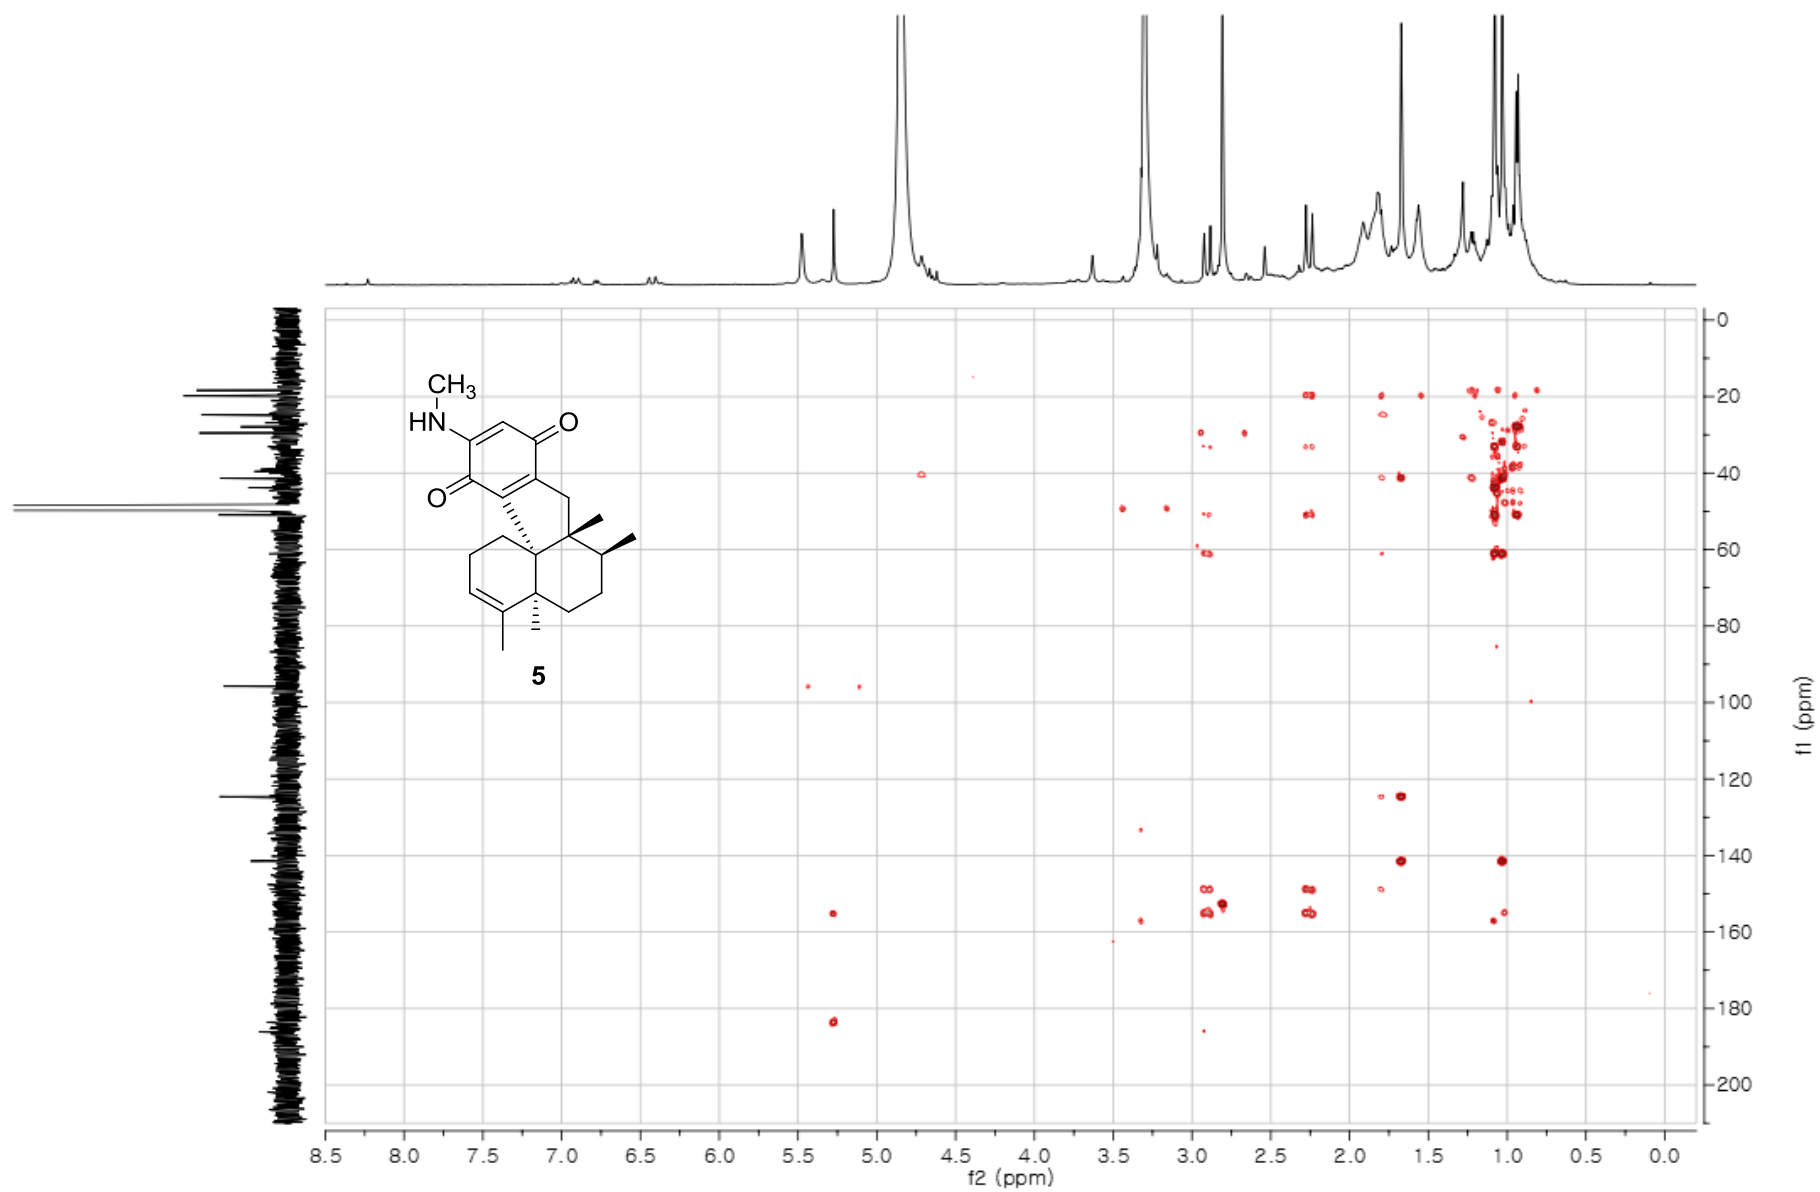

**Figure S30.** The HMBC NMR (600 MHz,  $\text{CD}_3\text{OD}$ ) spectrum of compound **5**  
S33

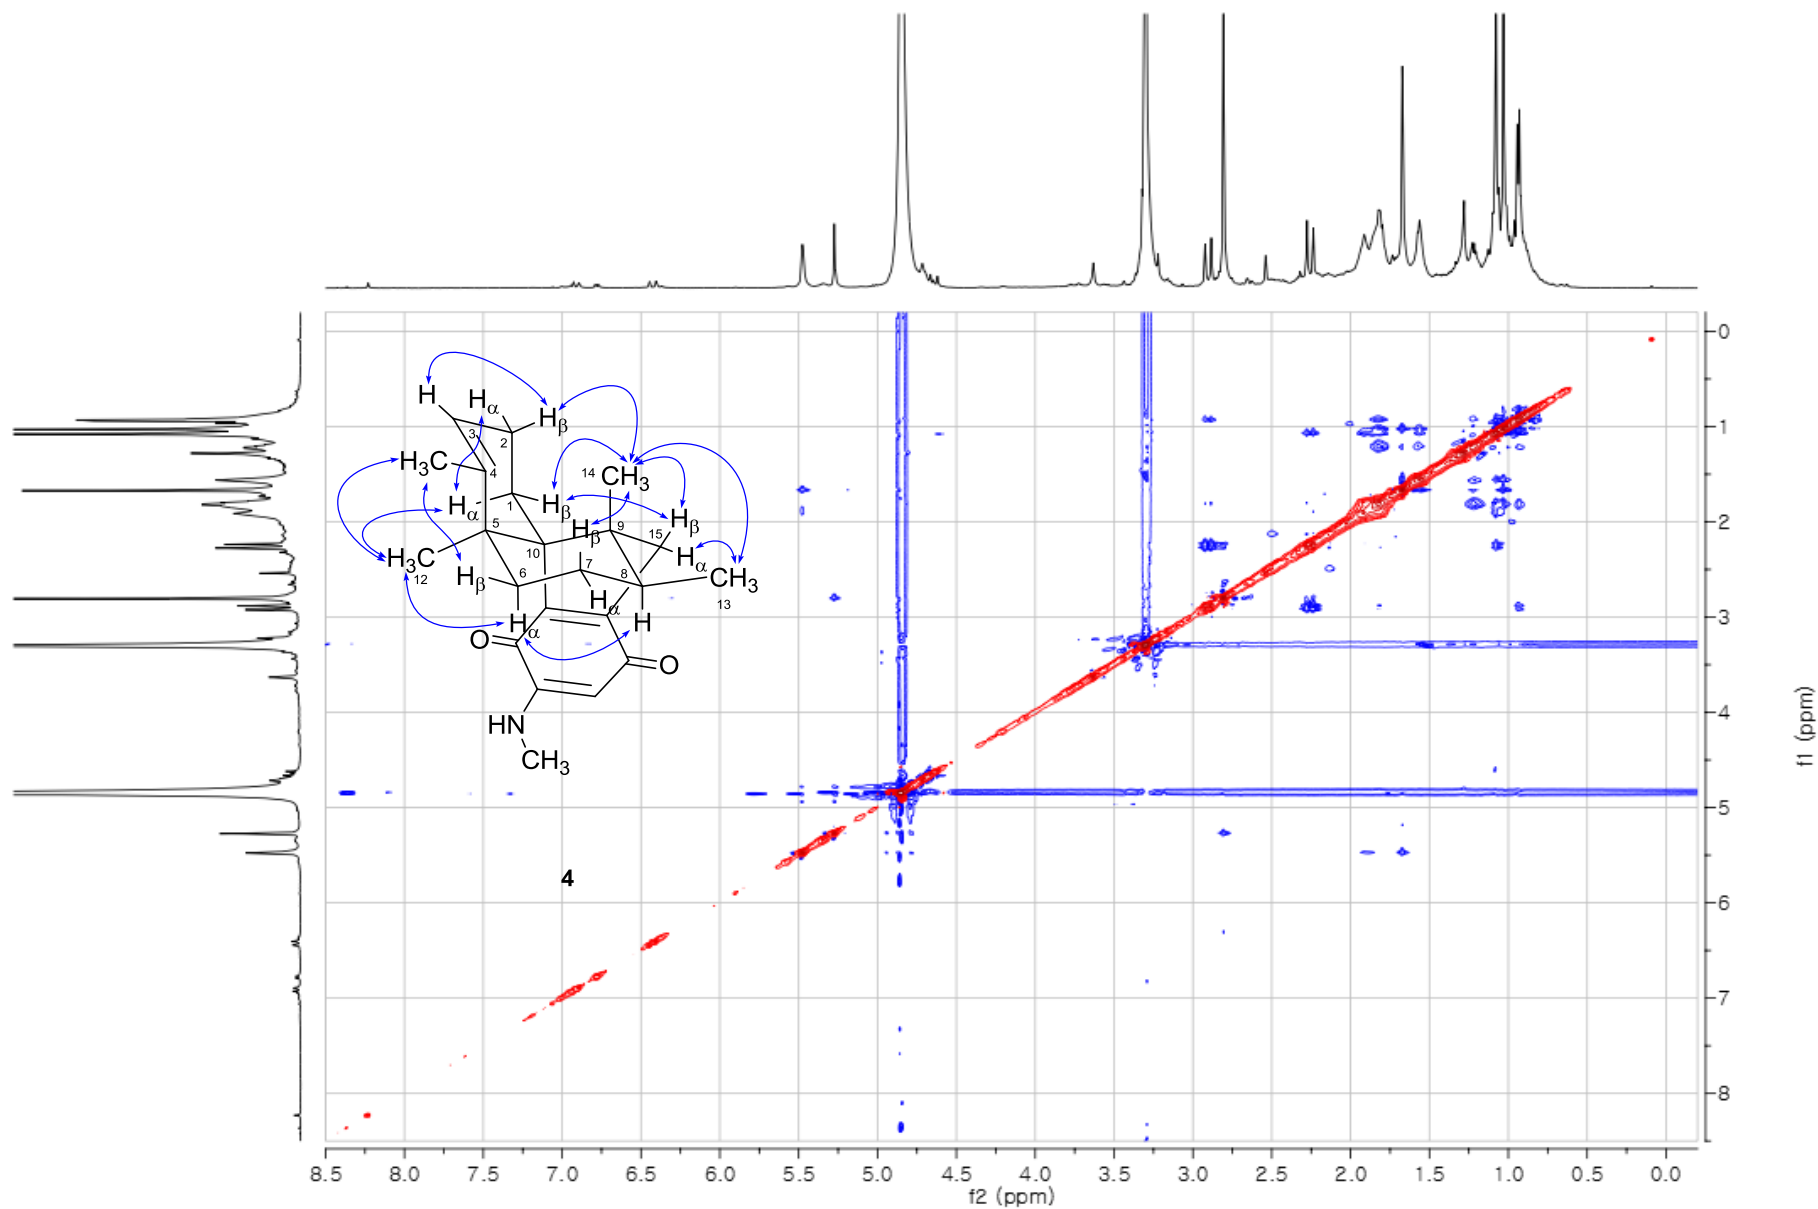

**Figure S31.** The NOESY NMR (600 MHz, CD<sub>3</sub>OD) spectrum of compound **5**

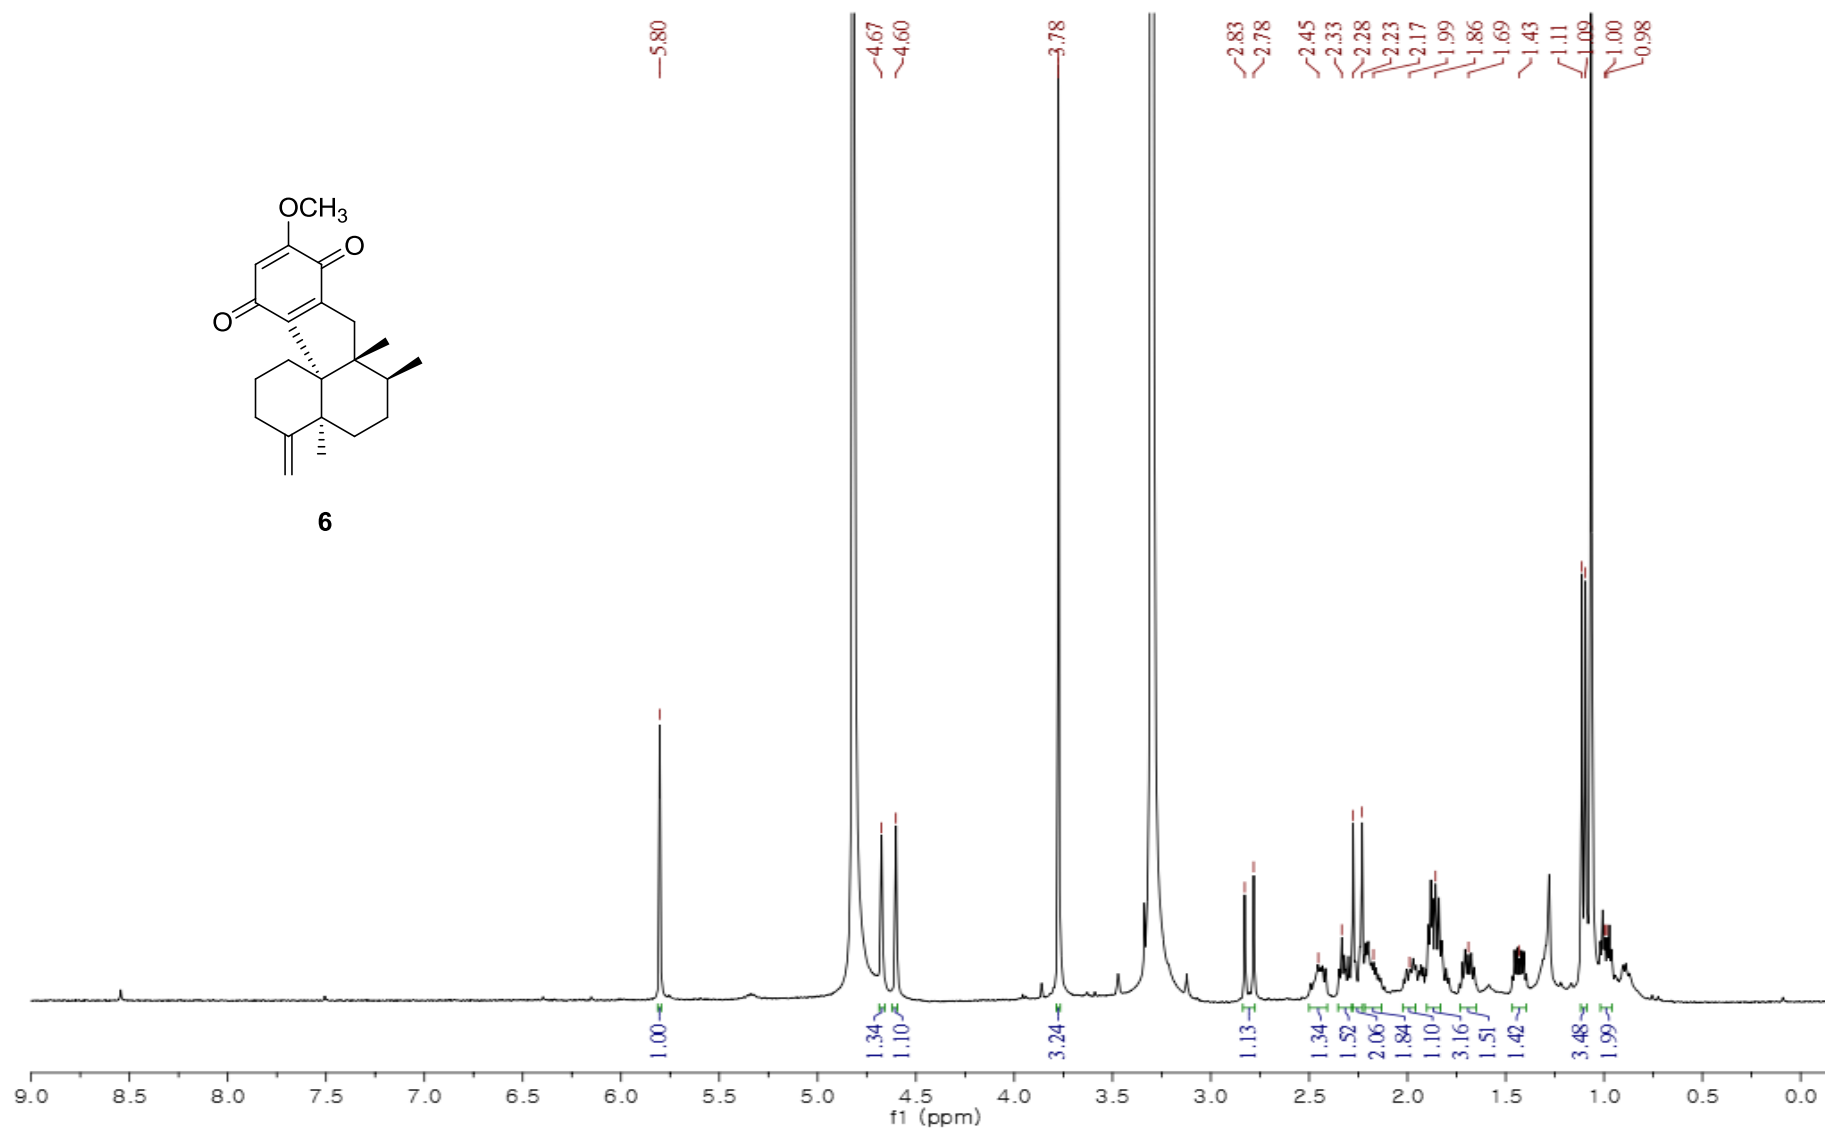

**Figure S32.** The  $^1\text{H}$  NMR (500 MHz,  $\text{CD}_3\text{OD}$ ) spectrum of compound **6**

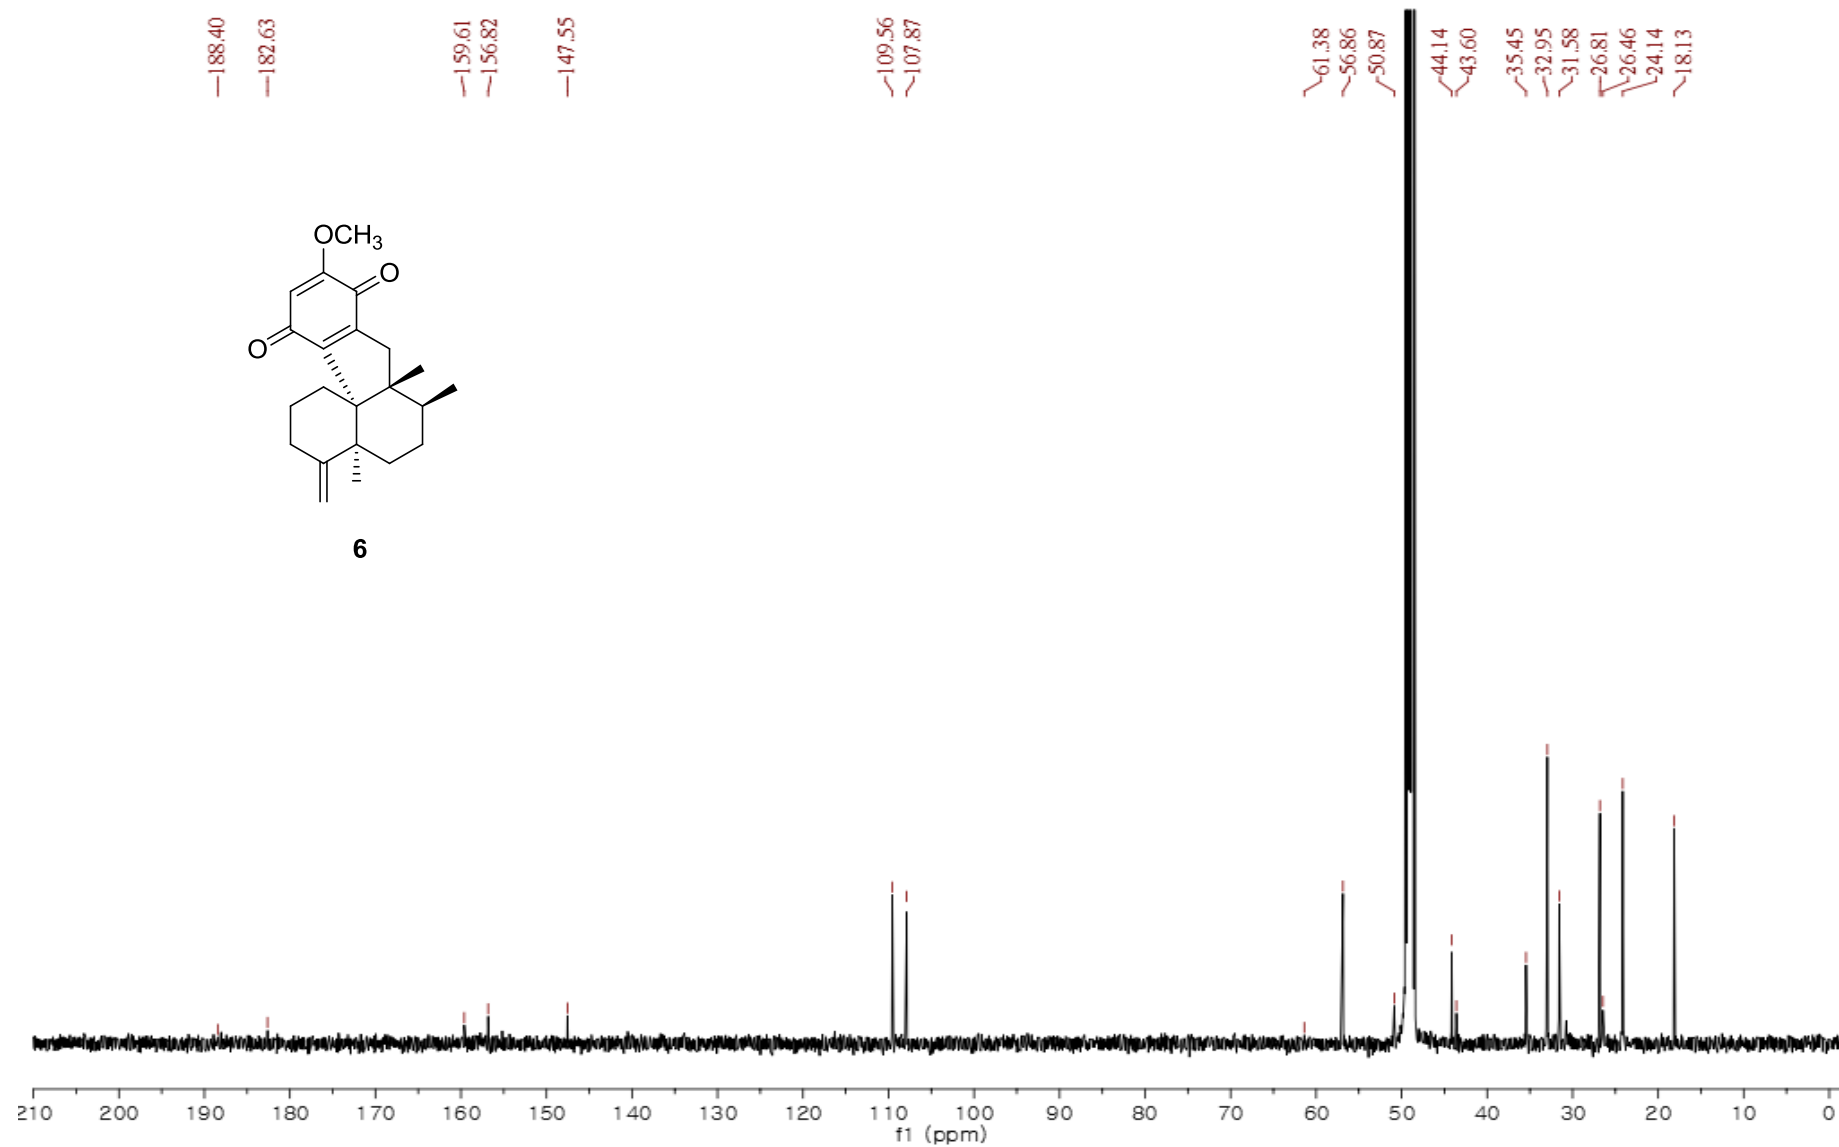

**Figure S33.** The <sup>13</sup>C NMR (125 MHz, CD<sub>3</sub>OD) spectrum of compound **6**

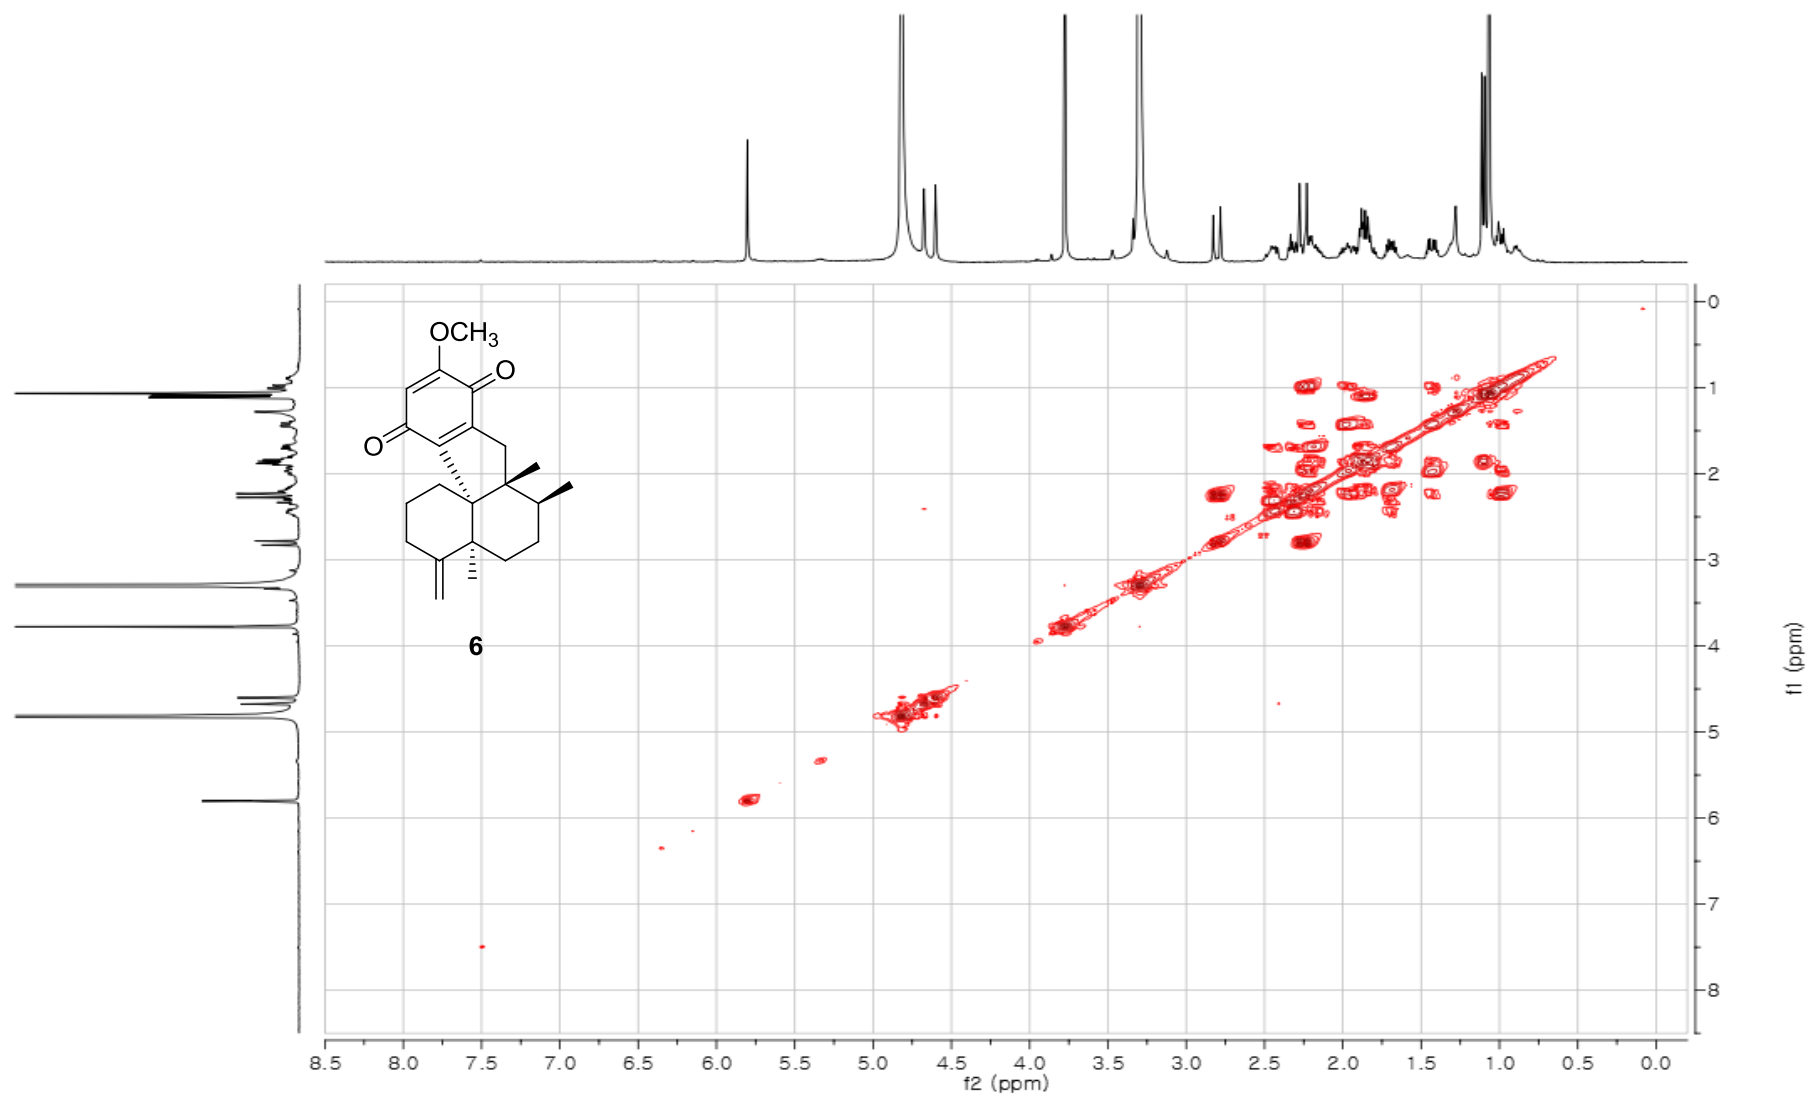

**Figure S34.** The COSY NMR (500 MHz,  $\text{CD}_3\text{OD}$ ) spectrum of compound **6**

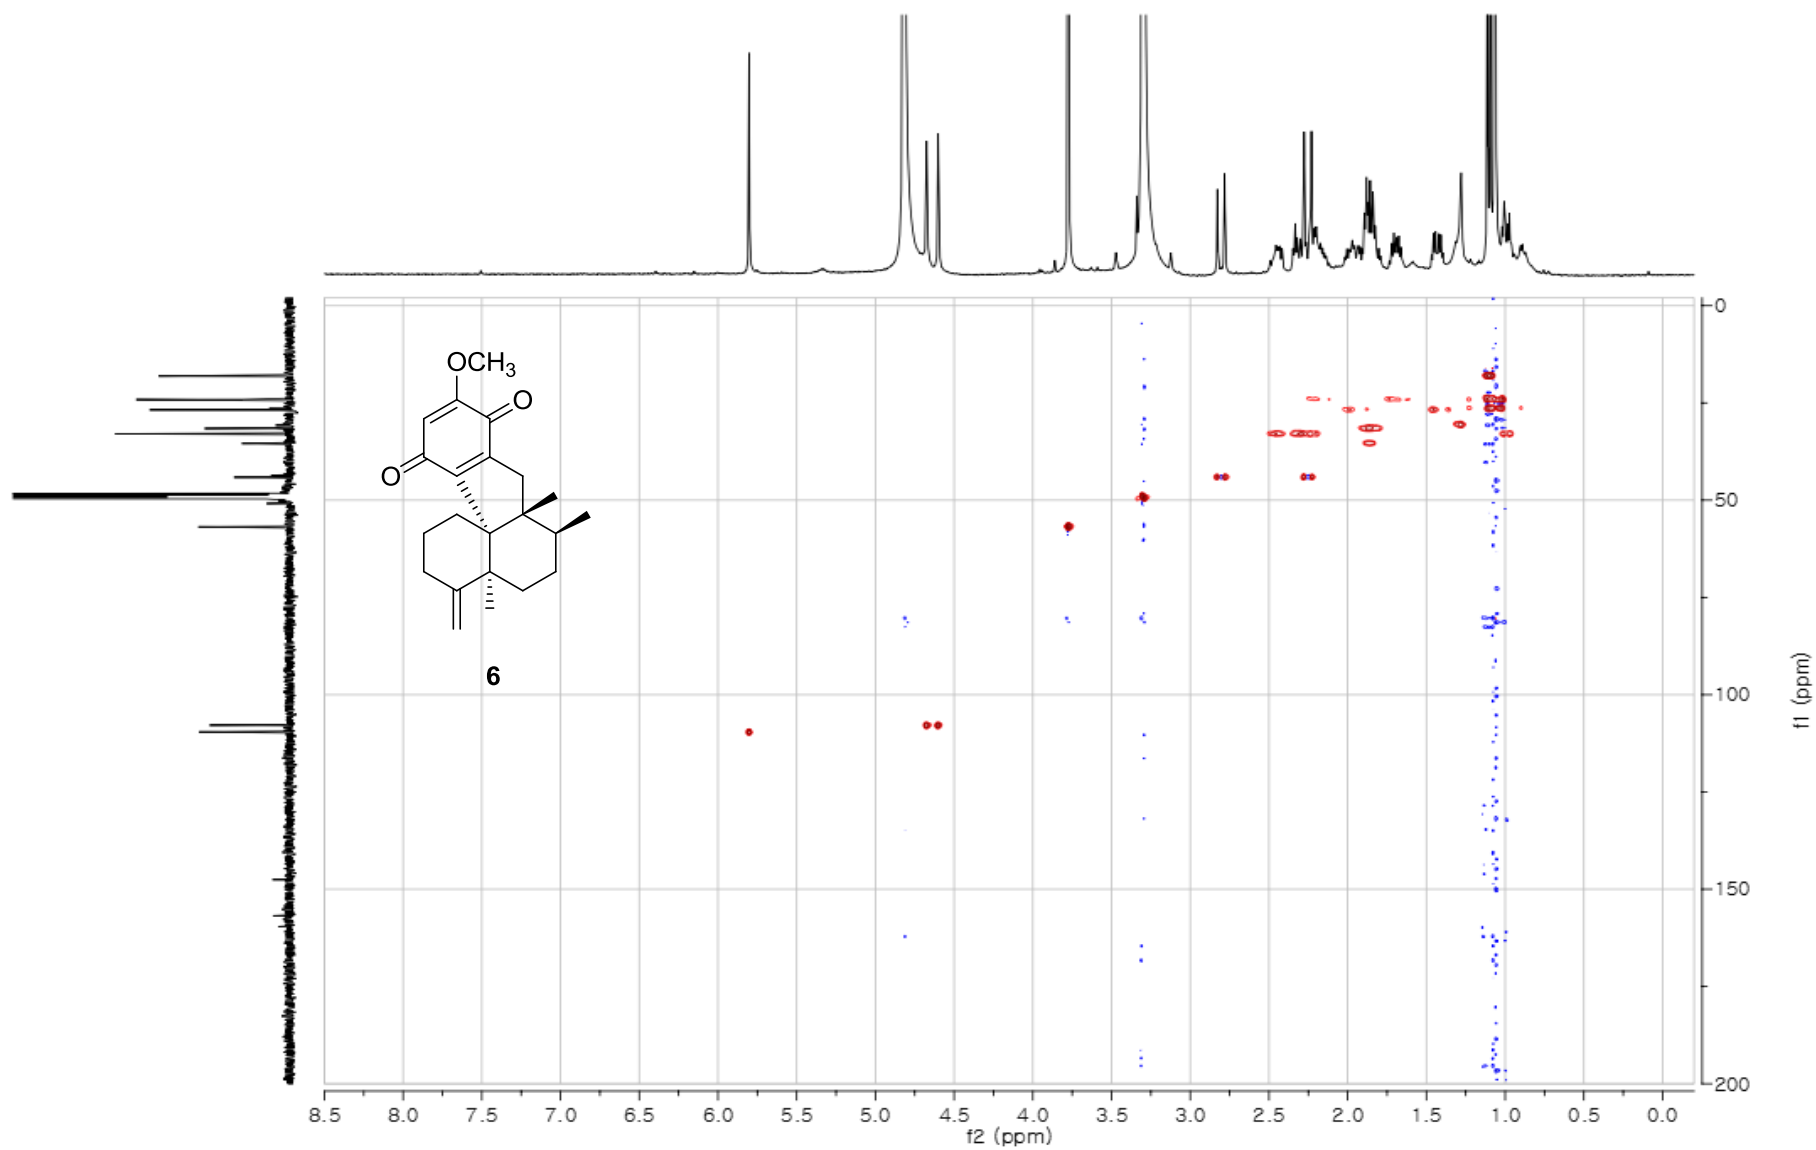

**Figure S35.** The HSQC NMR (500 MHz, CD<sub>3</sub>OD) spectrum of compound **6**

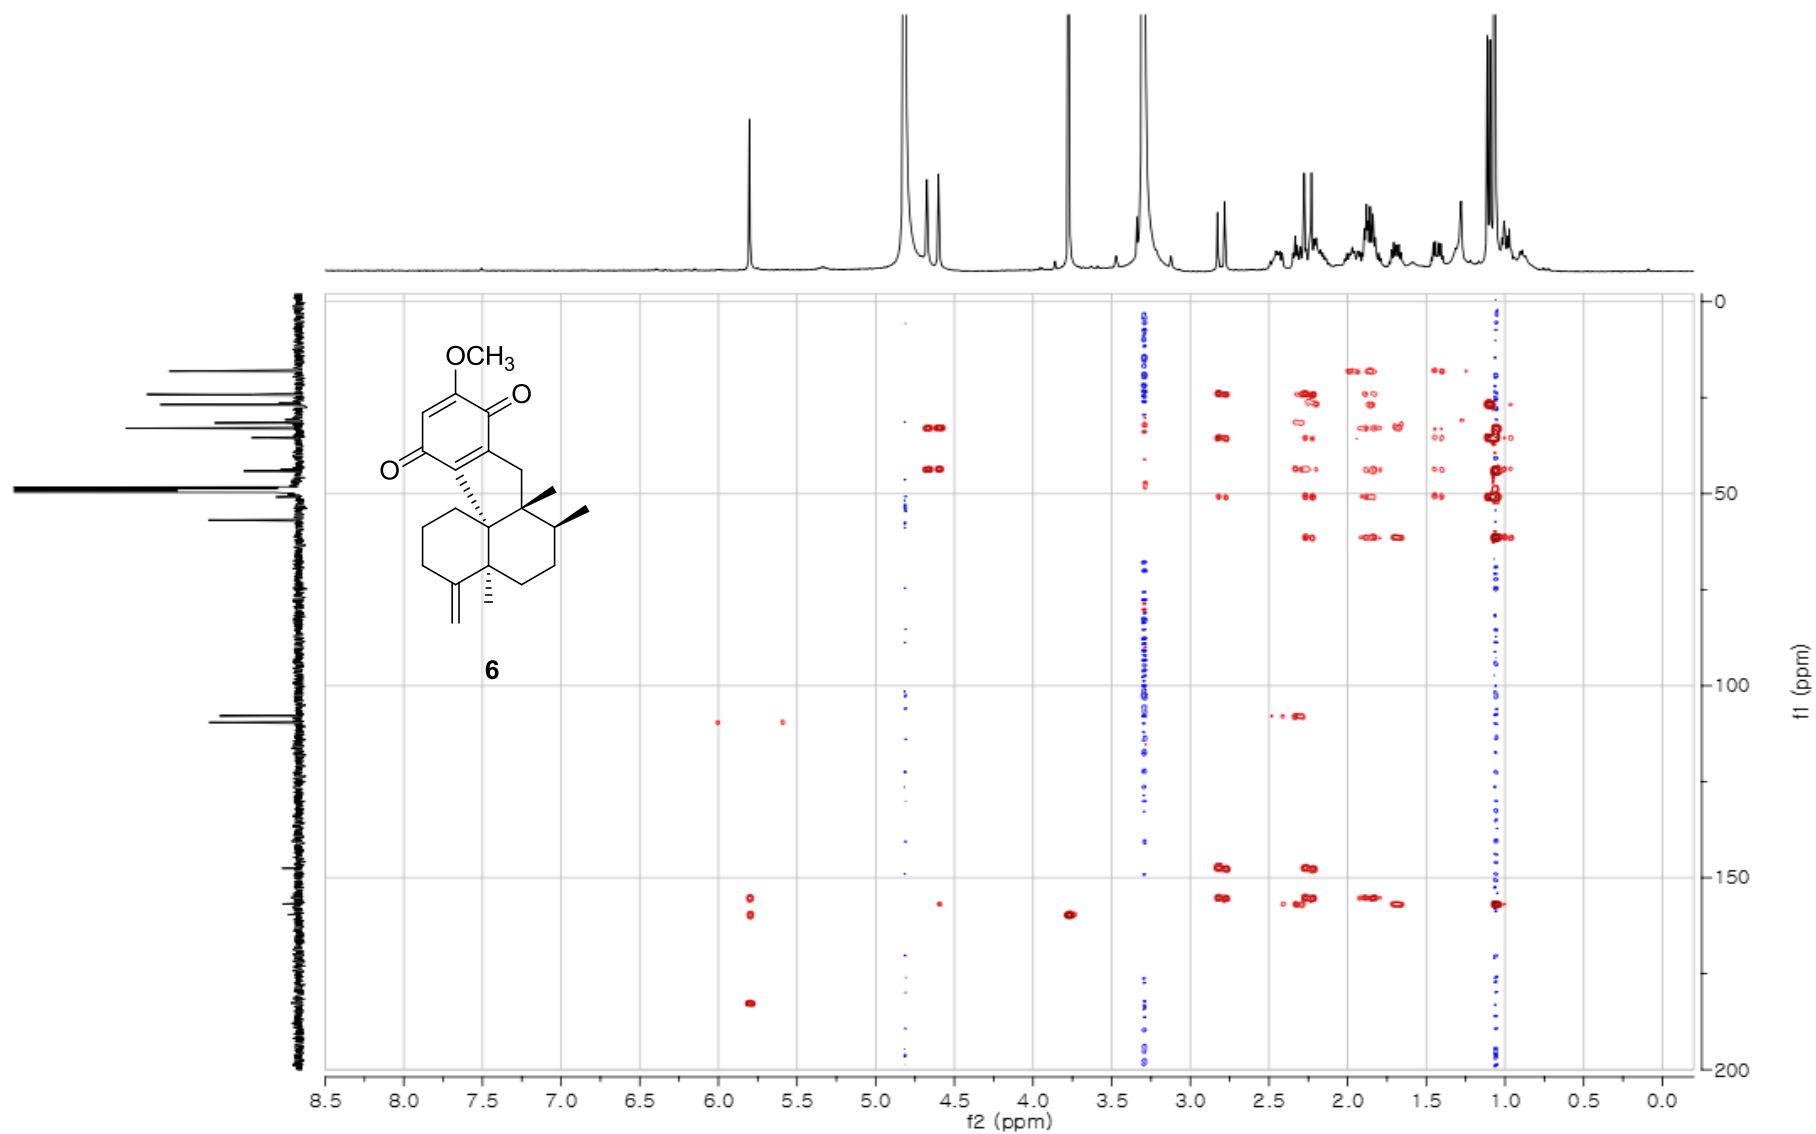

**Figure S36.** The HMBC NMR (500 MHz,  $\text{CD}_3\text{OD}$ ) spectrum of compound **6**

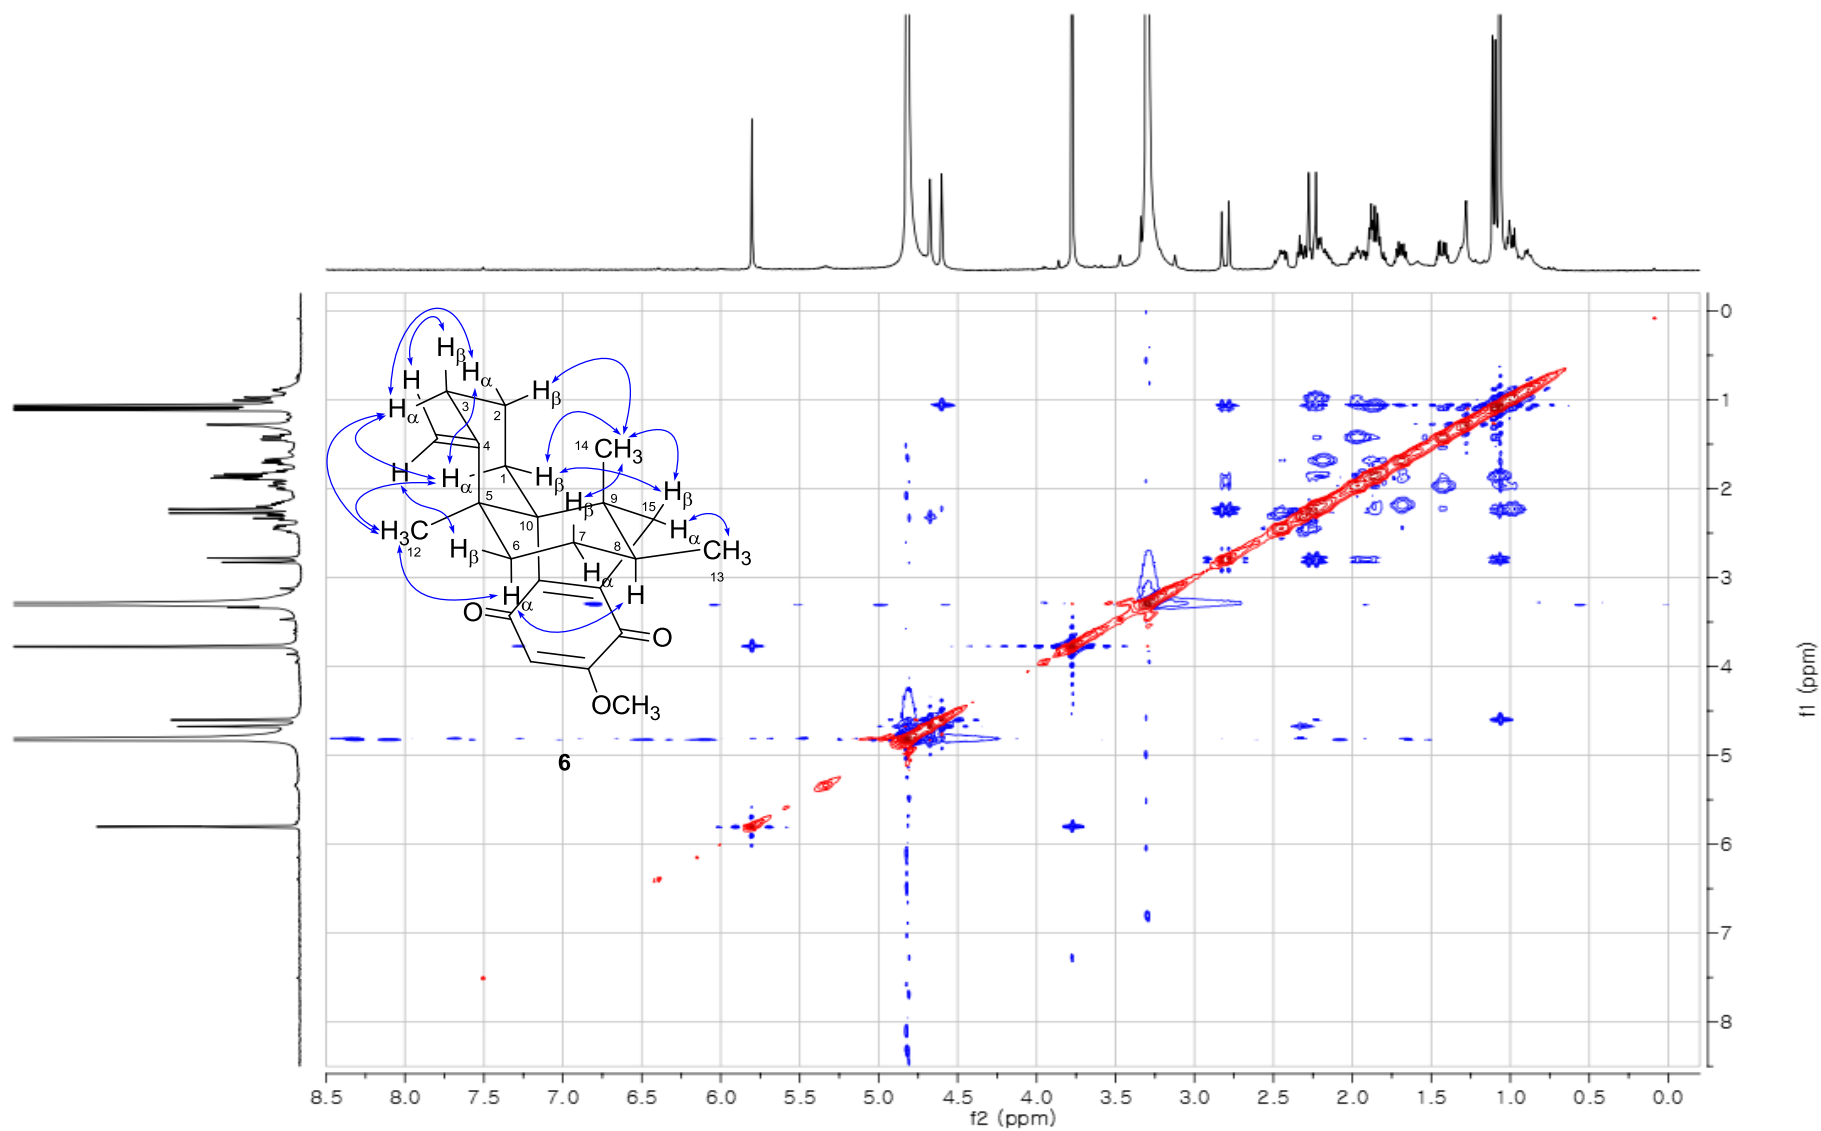

**Figure S37.** The NOESY NMR (500 MHz, CD<sub>3</sub>OD) spectrum of compound **6**



**Figure S38.** Energy minimized conformation of cycloaurenone C (**6**) at the basis set def-SV(P) for all atoms and functional B3LYP/DFT level.

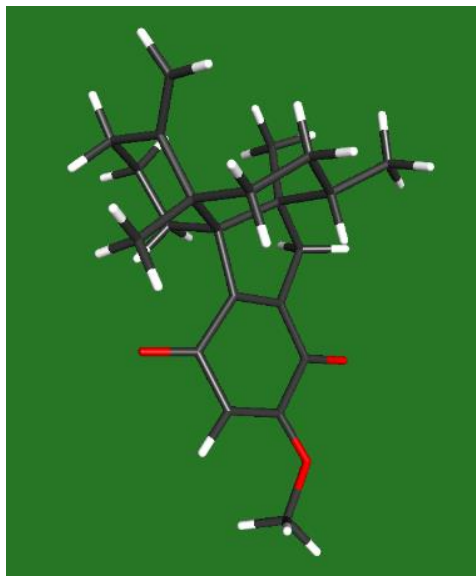

cycloaurenone C (**6**) : total energy = -1079.28129245278  
 kinetic energy = 1068.71443177919, potential energy = -2147.99572423196  
 DFT settings (Functional B3-LYP / Gridsize M3), Geometry optimization options (Energy  $10^{-6}$  Hartree, Gradient norm  $|dE / dxyz| = 10^{-3}$  Hartree/Bohr)

**Figure S39.** Energy minimized conformation of cycloaurenone C (*ent*-**6**) at the basis set def-SV(P) for all atoms and functional B3LYP/DFT level.

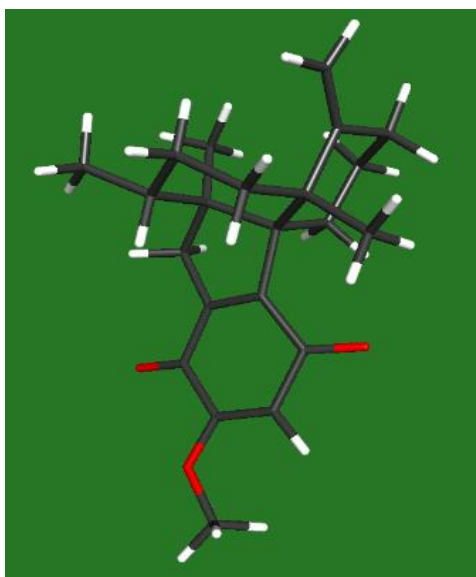

cycloaurenone C (*ent*-**6**) : total energy = -1079.28122946455  
 kinetic energy = 1068.71203078936, potential energy = -2147.99326025390  
 DFT settings (Functional B3-LYP / Gridsize M3), Geometry optimization options (Energy  $10^{-6}$  Hartree, Gradient norm  $|dE / dxyz| = 10^{-3}$  Hartree/Bohr)

**Table S1.** Energy minimized coordinates of cycloaurenone C (**6**) at the basis set def-SV(P) for all atoms (Å)

| atom | x       | y       | z       |
|------|---------|---------|---------|
| C    | -3.2476 | -0.3831 | -2.273  |
| C    | -4.108  | -1.4169 | -2.8944 |
| C    | -2.922  | -0.4078 | -0.9566 |
| H    | -5.6607 | -3.5529 | 0.3521  |
| H    | -4.0533 | -4.1394 | 0.7783  |
| C    | -3.1398 | -6.3265 | -2.5715 |
| H    | -2.5401 | -4.5734 | -3.6432 |
| H    | -3.0426 | -5.8888 | -4.7011 |
| H    | -3.8269 | -7.1858 | -2.6513 |
| C    | -5.8909 | -5.9091 | -0.8443 |
| H    | -6.8603 | -5.4163 | -0.6735 |
| H    | -5.639  | -6.43   | 0.0948  |
| H    | -3.6491 | -7.4682 | -0.1374 |
| C    | -4.3213 | -2.6922 | -2.1275 |
| C    | -4.1081 | -2.6388 | -0.7898 |
| C    | -3.4098 | -1.54   | -0.0877 |
| C    | -5.0878 | -3.9841 | -2.5199 |
| C    | -4.6731 | -3.8212 | -0.074  |
| C    | -4.7949 | -4.8897 | -1.1932 |
| C    | -4.6761 | -4.7106 | -3.8925 |
| H    | -6.0265 | -6.6721 | -1.6284 |
| C    | -3.078  | -6.525  | -0.0734 |
| H    | -2.0062 | -6.7944 | -0.0863 |
| C    | -4.535  | -3.7529 | -5.111  |
| H    | -5.3944 | -3.0881 | -5.2636 |
| H    | -4.405  | -4.3705 | -6.0178 |
| H    | -3.6466 | -3.1116 | -5.0138 |
| C    | -7.1697 | -5.1286 | -4.4454 |
| C    | -7.6321 | -4.4673 | -3.1451 |
| C    | -3.3841 | -5.5885 | -1.2571 |
| H    | -2.1162 | -6.7467 | -2.5663 |
| C    | -3.2908 | -5.3794 | -3.753  |
| H    | -2.6376 | -4.7724 | -1.217  |
| H    | -3.2865 | -6.0695 | 0.9104  |
| C    | -5.7768 | -5.7114 | -4.3177 |

**Table S2.** Energy minimized coordinates of cycloaurenone C (*ent*-6) at the basis set def-SV(P) for all atoms (Å )

| atom | x        | y       | z        |
|------|----------|---------|----------|
| C    | -6.7165  | -8.1566 | -7.0617  |
| C    | -8.0185  | -7.6081 | -6.6138  |
| C    | -6.0113  | -7.6069 | -8.0816  |
| C    | -10.1473 | -5.1613 | -8.827   |
| H    | -8.3949  | -4.7333 | -10.1493 |
| C    | -11.7152 | -7.7035 | -8.4589  |
| C    | -11.8773 | -6.8676 | -9.7196  |
| H    | -10.8878 | -8.419  | -8.6271  |
| H    | -12.7278 | -6.1702 | -9.6342  |
| H    | -12.1048 | -7.5323 | -10.5744 |
| C    | -10.9613 | -3.8575 | -8.8174  |
| H    | -12.0314 | -4.0256 | -8.6112  |
| H    | -11.6352 | -4.7369 | -11.4146 |
| C    | -8.7205  | -6.6514 | -7.5361  |
| C    | -7.952   | -6.0247 | -8.4605  |
| C    | -6.5734  | -6.4199 | -8.8231  |
| H    | -6.3279  | -8.9614 | -6.4346  |
| C    | -10.109  | -5.9674 | -7.4081  |
| C    | -8.6468  | -4.8595 | -9.085   |
| H    | -8.3195  | -3.9267 | -8.5835  |
| H    | -10.8808 | -3.3534 | -9.7952  |
| H    | -10.5749 | -3.146  | -8.0713  |
| H    | -10.8333 | -6.1258 | -12.1778 |
| H    | -9.8632  | -4.7424 | -11.6262 |
| C    | -11.2034 | -7.9913 | -6.0737  |
| H    | -10.5029 | -8.775  | -6.3978  |
| H    | -10.8293 | -7.6025 | -5.1187  |
| C    | -12.5894 | -6.0635 | -6.6824  |
| C    | -12.3331 | -5.2327 | -5.4409  |
| H    | -12.611  | -8.3235 | -8.278   |
| C    | -10.5972 | -6.0897 | -10.018  |
| C    | -11.3903 | -6.9084 | -7.1748  |
| C    | -10.7333 | -5.3735 | -11.3743 |
| H    | -9.7964  | -6.8436 | -10.1361 |
| H    | -12.1833 | -8.47   | -5.896   |
